# Supplementary material for: Discovery of novel West Nile Virus protease inhibitor based on isobenzonafuranone and triazolic derivatives of eugenol and indan-1,3-dione scaffolds
Source: PubMed Central journal article supplement (PMC6762200; doi:10.1371/journal.pone.0223017), 2019-09-26
Supplement: pone.0223017.s001.pdf [file pone.0223017.s001.pdf]

# SUPPLEMENTARY MATERIAL

## Discovery of novel West Nile Virus protease inhibitor based on isobenzonafuranone and triazolic derivatives of eugenol and indan-1,3-dione scaffolds

André S. de Oliveira<sup>1,2¶</sup>, Poliana Aparecida Rodrigues Gazolla<sup>2¶</sup>, Ana Flávia C. da S. Oliveira<sup>1,2¶</sup>, Wagner Luiz Pereira<sup>2</sup>, Livia Cristina de Souza Viol<sup>2</sup>, Angélica Faleiros da Silva Maia<sup>2</sup>, Edjon G. Santos<sup>1</sup>, Ítalo Esposti P. da Silva<sup>1</sup>, Tiago Antônio de Oliveira Mendes<sup>4</sup>, Adalberto Manoel da Silva<sup>3</sup>, Roberto Sousa Dias<sup>1</sup>, Cynthia Canedo da Silva<sup>1</sup>, Marcelo D. Polêto<sup>1</sup>, Róbson R. Teixeira<sup>3\*</sup>, and Sergio O. de Paula<sup>\*1</sup>

<sup>1</sup> Departamento de Biologia Geral, Universidade Federal de Viçosa, Av. P.H. Rolfs, S/N, Viçosa-MG (Brazil).

<sup>2</sup> Instituto Federal de Educação, Ciência e Tecnologia do Norte de Minas Gerais, Fazenda Biribiri, S/N, Diamantina-MG (Brazil).

<sup>3</sup> Departamento de Química, Universidade Federal de Viçosa, Av. P.H. Rolfs, S/N, Viçosa-MG (Brazil).

<sup>4</sup> Departamento de Bioquímica Biologia Molecular, Universidade Federal de Viçosa, Av. P.H. Rolfs, S/N, Viçosa-MG (Brazil).

<sup>5</sup> Instituto Federal de Educação, Ciência e Tecnologia Catarinense, Campus Araquari Rodovia BR 280, km 27 - Araquari-SC (Brazil).

\* Corresponding authors

depaula@ufv.br (SOP)

robsonr.teixeira@ufv.br (RRT)

¶These authors contributed equally.

# CONTENTS

|                                         | <b>Page</b> |
|-----------------------------------------|-------------|
| <b>Table A.....</b>                     | <b>3</b>    |
| <b>Selected IR AND NMR SPECTRA.....</b> | <b>12</b>   |
| <b>Figure S1.....</b>                   | <b>73</b>   |

**Table A: Docking of the compounds 23 to 49 with WNV protease**

| Comp. | Ligation               |                                                                                               | Interacti<br>on<br>distance<br>(Å) | aa                 | Docking/Ligation Energy                                                                                 |
|-------|------------------------|-----------------------------------------------------------------------------------------------|------------------------------------|--------------------|---------------------------------------------------------------------------------------------------------|
|       | Ligation<br>type       | Description                                                                                   |                                    |                    |                                                                                                         |
| 23    | Hydrogen<br>Bond       | OH of the amino acid with the<br>oxygen of the carbonic chain of the<br>molecule              | 2,45                               | Thr <sup>132</sup> | 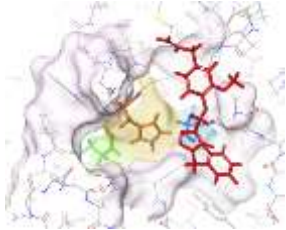<br>Energy: -2,318   |
| 24    |                        | No chemical interaction predicted                                                             |                                    |                    | <br>Energy: -1,081  |
| 25    | Hydrogen<br>Bond       | NH <sub>2</sub> of the amino acid with the<br>oxygen of the carbonic chain of the<br>molecule | 1,92                               | Asn <sup>84</sup>  |                                                                                                         |
| 25    | Halogen<br>Bond        | OH of the amino acid with the<br>chlorine of the molecule                                     | 3,26                               | Thr <sup>134</sup> |                                                                                                         |
| 25    | Halogen<br>Bond        | NH <sup>+</sup> of the amino acid with the<br>iodine of the molecule                          | 2,62                               | Gly <sup>133</sup> |                                                                                                         |
| 25    | Halogen<br>Bond        | NH <sup>+</sup> of the amino acid with the<br>iodine of the molecule                          | 3,42                               | Thr <sup>134</sup> | <br>Energy: +2,058 |
| 25    | cation- $\pi$          | NH <sup>+</sup> of the amino acid ring with the<br>phenyl ring of the molecule                | 6,39                               | His <sup>51</sup>  |                                                                                                         |
| 25    | $\pi$ - $\pi$ stacking | Amino acid ring with the triazole<br>ring of the molecule                                     | 4,11                               | His <sup>51</sup>  |                                                                                                         |

**Table A: Docking of the compounds 23 to 49 with WNV protease**

| Comp. | Ligation               |                                                                                                | Interacti<br>on<br>distance<br>(Å) | aa                             | Docking/Ligation Energy                                                                                 |
|-------|------------------------|------------------------------------------------------------------------------------------------|------------------------------------|--------------------------------|---------------------------------------------------------------------------------------------------------|
|       | Ligation<br>type       | Description                                                                                    |                                    |                                |                                                                                                         |
| 26    |                        | No chemical interaction predicted                                                              |                                    |                                | 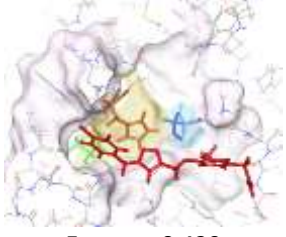<br>Energy: -0,429   |
| 27    | cation- $\pi$          | NH <sup>+</sup> of the amino acid ring with the triazole ring of the molecule                  | 5,43                               | His <sup>51</sup>              |                                                                                                         |
| 27    | cation- $\pi$          | NH <sup>+</sup> of the amino acid ring with the phenyl ring of the molecule                    | 6,20                               | His <sup>51</sup>              |                                                                                                         |
| 27    | $\pi$ - $\pi$ stacking | Amino acid ring with the phenyl ring of the molecule                                           | 5,15                               | His <sup>51</sup>              |                                                                                                         |
| 27    | Halogen Bond           | NH <sup>+</sup> of the amino acid with the iodine of the molecule                              | 2,43                               | Ser <sup>135</sup>             | <br>Energy: -0,055  |
| 27    | Halogen Bond           | NH <sup>+</sup> of the amino acid with the iodine of the molecule                              | 2,82                               | Thr <sup>134</sup>             |                                                                                                         |
| 28    | Hydrogen Bond          | OH of the amino acid with the oxygen of the carbonic chain of the molecule                     | 2,24                               | Thr <sup>132</sup>             |                                                                                                         |
| 28    | Hydrogen Bond          | O <sup>-</sup> of the amino acid with the NO <sub>2</sub> H <sub>2</sub> of the molecule       | 1,89                               | Asp <sup>12</sup> <sub>9</sub> |                                                                                                         |
| 28    | Hydrogen Bond          | O <sup>-</sup> of the amino acid with the NO <sub>2</sub> H <sub>2</sub> of the molecule       | 2,07                               | Asp <sup>12</sup> <sub>9</sub> |                                                                                                         |
| 28    | Hydrogen Bond          | NH <sup>+</sup> of the amino acid with the nitrogen of triazole ring of the molecule           | 2,46                               | Ser <sup>135</sup>             | <br>Energy: -2,732 |
| 28    | $\pi$ - $\pi$ stacking | Amino acid ring with the phenyl ring of the molecule                                           | 4,39                               | Tyr <sup>161</sup>             |                                                                                                         |
| 29    | Hydrogen Bond          | NH <sup>+</sup> of the amino acid with the OCH <sub>3</sub> of the phenyl ring in the molecule | 1,98                               | Gly <sup>133</sup>             |                    |



**Table A: Docking of the compounds 23 to 49 with WNV protease**

| Comp. | Ligation                          |                                                                                               | Interacti<br>on<br>distance<br>(Å) | aa                 | Docking/Ligation Energy                                                                                 |
|-------|-----------------------------------|-----------------------------------------------------------------------------------------------|------------------------------------|--------------------|---------------------------------------------------------------------------------------------------------|
|       | Ligation<br>type                  | Description                                                                                   |                                    |                    |                                                                                                         |
| 29    | cation- $\pi$                     | NH <sup>+</sup> of the amino acid ring with the triazole ring of the molecule                 | 6,13                               | His <sup>51</sup>  | Energy: -3,991                                                                                          |
| 29    | cation- $\pi$                     | NH <sup>+</sup> of the amino acid ring with the triazole ring of the molecule                 | 3,81                               | His <sup>51</sup>  |                                                                                                         |
| 29    | $\pi$ - $\pi$ stacking            | Amino acid ring with the phenyl ring of the molecule                                          | 5,04                               | His <sup>51</sup>  |                                                                                                         |
| 29    | $\pi$ - $\pi$ stacking            | Amino acid ring with the eugenol ring of the molecule                                         | 3,96                               | His <sup>51</sup>  |                                                                                                         |
| 30    | Hydrogen Bond                     | NH <sup>+</sup> of the amino acid with the OF <sub>3</sub> of the phenyl ring of the molecule | 1,96                               | Gly <sup>133</sup> | <br>Energy: -1,459  |
| 30    | Hydrogen Bond                     | NH <sub>2</sub> of the amino acid with the OCH <sub>3</sub> of the molecule                   | 2,08                               | Asn <sup>84</sup>  |                                                                                                         |
| 30    | cation- $\pi$                     | NH <sup>+</sup> of the amino acid ring with the phenyl ring of the molecule                   | 6,01                               | His <sup>51</sup>  |                                                                                                         |
| 30    | $\pi$ - $\pi$ stacking            | Amino acid ring with the phenyl ring of the molecule                                          | 4,93                               | His <sup>51</sup>  |                                                                                                         |
| 31    | $\pi$ - $\pi$ stacking            | Ring of the amino acid with the eugenol ring of the molecule                                  | 5,08                               | Tyr <sup>161</sup> | <br>Energy: +1,993 |
| 32    | No chemical interaction predicted |                                                                                               |                                    |                    | <br>Energy: +2,136 |

**Table A: Docking of the compounds 23 to 49 with WNV protease**

| Comp. | Ligation         |                                                                                                  | Interacti<br>on<br>distance<br>(Å) | aa                 | Docking/Ligation Energy                                                                                     |
|-------|------------------|--------------------------------------------------------------------------------------------------|------------------------------------|--------------------|-------------------------------------------------------------------------------------------------------------|
|       | Ligation<br>type | Description                                                                                      |                                    |                    |                                                                                                             |
| 33    | Hydrogen<br>Bond | NH <sup>+</sup> of the amino acid with the<br>OCH <sub>3</sub> of the eugenol of the<br>molecule | 1,80                               | Ile <sup>155</sup> | 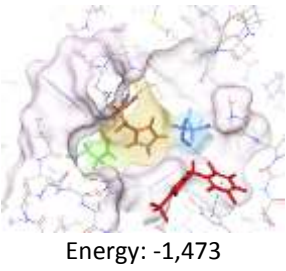 <p>Energy: -1,473</p>   |
| 33    | Halogen<br>Bond  | OH of the amino acid with the<br>iodine of the molecule                                          | 2,68                               | Ser <sup>135</sup> |                                                                                                             |
| 33    | π-π stacking     | Ring of the amino acid with the<br>phenyl ring of the molecule                                   | 3,80                               | Tyr <sup>161</sup> |                                                                                                             |
| 34    | Hydrogen<br>Bond | NH <sub>2</sub> of the amino acid with the<br>oxygen of the carbonic chain of the<br>molecule    | 1,84                               | Asn <sup>84</sup>  |  <p>Energy: +1,863</p>  |
| 35    | cation-π         | NH <sup>+</sup> of the amino acid ring with the<br>triazole ring of the molecule                 | 5,88                               | His <sup>51</sup>  |  <p>Energy: -2,343</p> |
| 35    | π-π stacking     | Amino acid ring with the triazole<br>ring of the molecule                                        | 5,04                               | His <sup>51</sup>  |                                                                                                             |
| 35    | π-π stacking     | Amino acid ring with the phenyl<br>ring of the molecule                                          | 4,22                               | Tyr <sup>161</sup> |                                                                                                             |
| 35    | Halogen<br>Bond  | OH of the amino acid with Bromo<br>of the molecule                                               | 2,10                               | Ser <sup>135</sup> |                                                                                                             |
| 35    | Halogen<br>Bond  | NH <sup>+</sup> do of the amino acid with<br>Bromo of the molecule                               | 3,25                               | Thr <sup>134</sup> |                                                                                                             |
| 36    | Hydrogen<br>Bond | NH <sup>+</sup> of the amino acid with the<br>nitrogen of triazole ring of the<br>molecule       | 2,70                               | Gly <sup>153</sup> |  <p>Energy: +1,825</p> |
| 36    | π-π stacking     | Amino acid ring with the phenyl<br>ring of the molecule                                          | 4,30                               | Tyr <sup>161</sup> |                                                                                                             |
| 36    | Halogen<br>Bond  | NH <sup>+</sup> of the amino acid with Bromo<br>of the molecule                                  | 3,19                               | Gly <sup>133</sup> |                                                                                                             |
| 36    | Halogen<br>Bond  | NH <sup>+</sup> of the amino acid with Bromo<br>of the molecule                                  | 3,01                               | Thr <sup>134</sup> |                                                                                                             |
| 36    | Halogen<br>Bond  | OH of the amino acid with Bromo<br>of the molecule                                               | 2,56                               | Ser <sup>135</sup> |                                                                                                             |

**Table A: Docking of the compounds 23 to 49 with WNV protease**

| Comp. | Ligation               |                                                                                            | Interacti<br>on<br>distance<br>(Å) | aa                             | Docking/Ligation Energy                                                                                 |
|-------|------------------------|--------------------------------------------------------------------------------------------|------------------------------------|--------------------------------|---------------------------------------------------------------------------------------------------------|
|       | Ligation<br>type       | Description                                                                                |                                    |                                |                                                                                                         |
| 37    | cation- $\pi$          | NH <sub>3</sub> <sup>+</sup> do of the amino acid with the eugenol ring of the molecule    | 5,31                               | Lys <sup>54</sup>              | 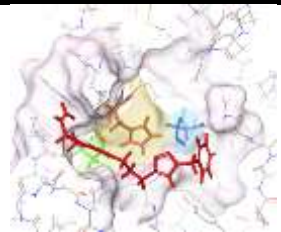<br>Energy: +2,012   |
| 38    | cation- $\pi$          | NH <sub>3</sub> <sup>+</sup> of the amino acid with the eugenol ring of the molecule       | 4,79                               | Lys <sup>54</sup>              | <br>Energy: +1,608   |
| 39    | Hydrogen Bond          | OH of the amino acid with the OCH <sub>3</sub> of the eugenol of the molecule              | 2,32                               | Thr <sup>132</sup>             | <br>Energy: -2,863  |
| 39    | cation- $\pi$          | NH <sup>+</sup> of the amino acid ring with the triazole ring of the molecule              | 3,82                               | His <sup>51</sup>              |                                                                                                         |
| 39    | $\pi$ - $\pi$ stacking | Amino acid ring with the triazole ring of the molecule                                     | 3,51                               | His <sup>51</sup>              |                                                                                                         |
| 40    | Hydrogen Bond          | NH <sup>+</sup> of the amino acid with the OCH <sub>3</sub> of the eugenol of the molecule | 2,77                               | His <sup>51</sup>              | <br>Energy: +1,347 |
| 41    | Hydrogen Bond          | NH <sup>+</sup> of the amino acid with the oxigênio da cadeia carbônica of the molecule    | 2,48                               | Gly <sup>133</sup>             | <br>Energy: -2,436 |
| 41    | Hydrogen Bond          | OH of the amino acid with the OCH <sub>3</sub> of the eugenol of the molecule              | 2,48                               | Thr <sup>132</sup>             |                                                                                                         |
| 42    | Hydrogen Bond          | O <sup>-</sup> of the amino acid with the NO <sub>2</sub> H <sub>2</sub> of the molecule   | 2,00                               | Asp <sup>12</sup> <sub>9</sub> |                    |

**Table A: Docking of the compounds 23 to 49 with WNV protease**

| Comp. | Ligation         |                                                                                                | Interacti<br>on<br>distance<br>(Å) | aa                             | Docking/Ligation Energy                                                               |
|-------|------------------|------------------------------------------------------------------------------------------------|------------------------------------|--------------------------------|---------------------------------------------------------------------------------------|
|       | Ligation<br>type | Description                                                                                    |                                    |                                |                                                                                       |
| 42    | Hydrogen<br>Bond | O <sup>-</sup> of the amino acid with the<br>NO <sub>2</sub> H <sub>2</sub> of the molecule    | 1,79                               | Asp <sup>12</sup> <sub>9</sub> | Energy: +0,463                                                                        |
| 42    | cation-π         | NH <sup>+</sup> of the amino acid ring with the<br>triazole ring of the molecule               | 4,49                               | His <sup>51</sup>              |                                                                                       |
| 42    | π-π stacking     | Amino acid ringwith the triazole<br>ring of the molecule                                       | 3,96                               | His <sup>51</sup>              |                                                                                       |
| 43    | Hydrogen<br>Bond | NH <sup>+</sup> of the amino acid with the<br>nitrogen of triazole ring of the<br>molecule     | 2,26                               | Gly <sup>133</sup>             | 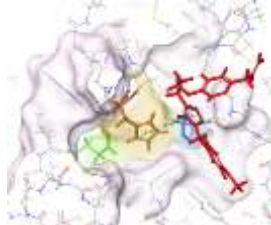   |
| 43    | cation-π         | NH <sup>+</sup> of the amino acid ring with the<br>triazole ring of the molecule               | 6,25                               | His <sup>51</sup>              |                                                                                       |
| 43    | π-π stacking     | Amino acid ringwith the triazole<br>ring of the molecule                                       | 5,15                               | His <sup>51</sup>              |                                                                                       |
| 44    | Hydrogen<br>Bond | NH <sup>+</sup> of the amino acid with the OF <sub>3</sub><br>of the molecule                  | 2,07                               | Gly <sup>133</sup>             |  |
| 44    | Hydrogen<br>Bond | NH <sub>2</sub> of the amino acid with<br>thexigênio da cadeia carbônica of<br>the molecule    | 1,73                               | Asn <sup>84</sup>              |                                                                                       |
| 45    | Hydrogen<br>Bond | NH <sup>+</sup> of the amino acid with the<br>nitrogênio da anel triazólico of the<br>molecule | 2,62                               | Gly <sup>133</sup>             |  |
|       |                  |                                                                                                |                                    |                                | Energy: +0,392                                                                        |
| 46    | Hydrogen<br>Bond | NH <sup>+</sup> of the amino acid with the<br>oxygen of the carbonic chain of the<br>molecule  | 2,63                               | Gly <sup>133</sup>             |  |
|       |                  |                                                                                                |                                    |                                | Energy: +2,811                                                                        |

**Table A: Docking of the compounds 23 to 49 with WNV protease**

| Comp. | Ligation               |                                                                                               | Interacti<br>on<br>distance<br>(Å) | aa                 | Docking/Ligation Energy                                                                                     |
|-------|------------------------|-----------------------------------------------------------------------------------------------|------------------------------------|--------------------|-------------------------------------------------------------------------------------------------------------|
|       | Ligation<br>type       | Description                                                                                   |                                    |                    |                                                                                                             |
| 47    | Hydrogen<br>Bond       | NH <sub>2</sub> of the amino acid with the<br>oxygen of the carbonic chain of the<br>molecule | 2,03                               | Asn <sup>84</sup>  | 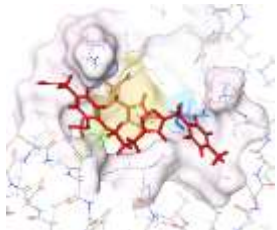 <p>Energy: -3,613</p>   |
| 47    | $\pi$ - $\pi$ stacking | Amino acid ring with the triazole<br>ring of the molecule                                     | 3,64                               | His <sup>51</sup>  |                                                                                                             |
| 48    | cation- $\pi$          | NH <sup>+</sup> of the amino acid ring with the<br>triazole ring of the molecule              | 5,26                               | His <sup>51</sup>  |  <p>Energy: +0,947</p>   |
| 48    | Halogen<br>Bond        | OH of the amino acid with Bromo<br>of the molecule                                            | 2,13                               | Ser <sup>135</sup> |                                                                                                             |
| 49    | $\pi$ - $\pi$ stacking | Amino acid ring with the phenyl<br>ring of the molecule                                       | 4,11                               | Tyr <sup>161</sup> |  <p>Energy: +0,969</p> |
| 49    | Halogen<br>Bond        | OH of the amino acid with Bromo<br>of the molecule                                            | 2,49                               | Ser <sup>135</sup> |                                                                                                             |
| 49    | Halogen<br>Bond        | NH <sup>+</sup> of the amino acid with Bromo<br>of the molecule                               | 3,41                               | Ser <sup>135</sup> |                                                                                                             |



## **SELECTED IR AND NMR SPECTRA**

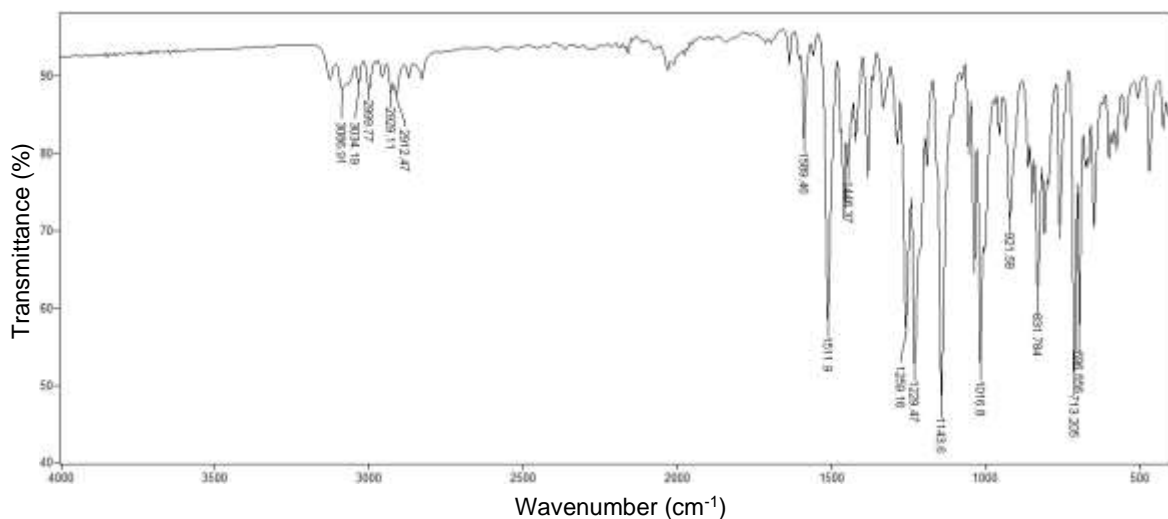

**Fig. A.** IR spectrum (ATR) of 4-((4-allyl-2-methoxyphenoxy)methyl)-1-benzyl-1*H*-1,2,3-triazole (**23**).

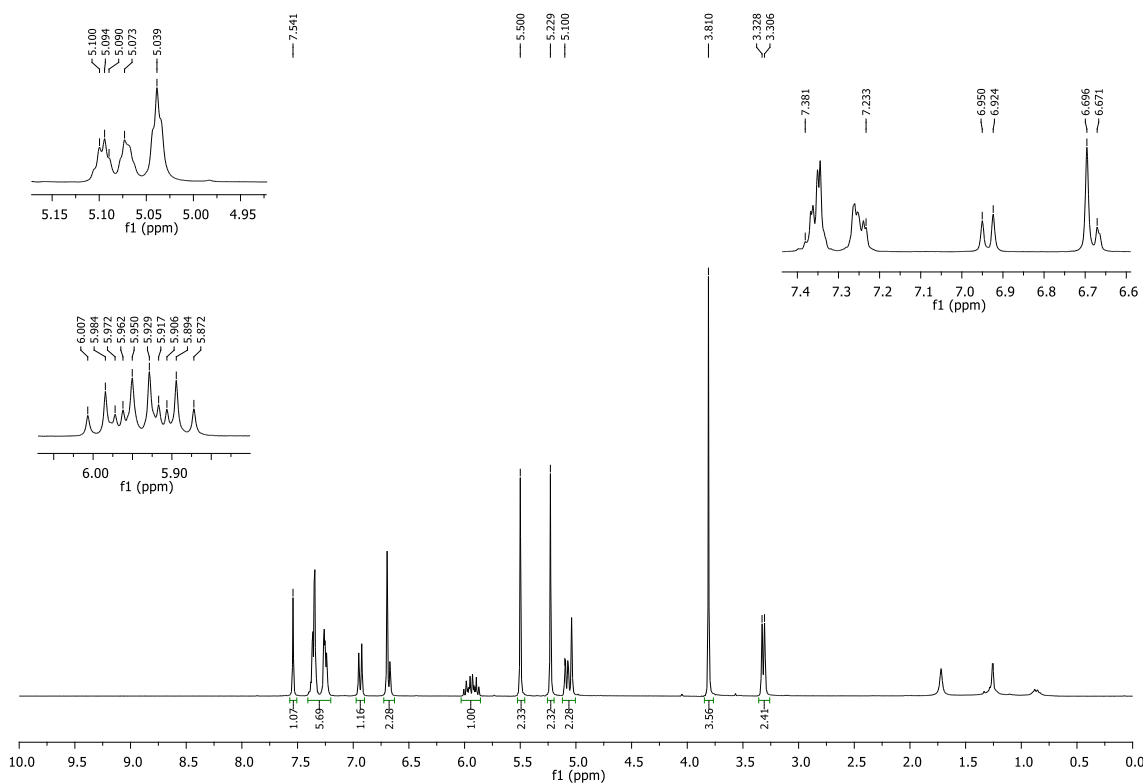

**Fig. B.**  $^1\text{H}$  NMR spectrum (300 MHz,  $\text{CDCl}_3$ ) of 4-((4-allyl-2-methoxyphenoxy)methyl)-1-benzyl-1*H*-1,2,3-triazole (**23**).



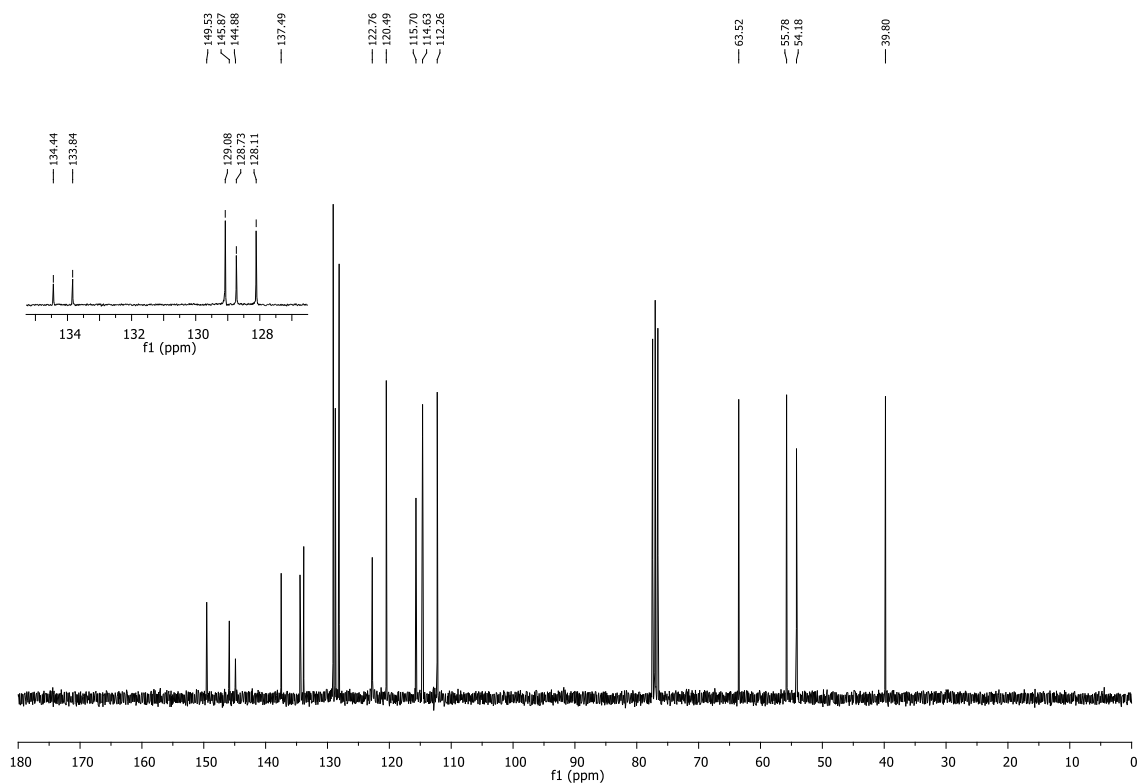

**Fig. C.**  $^{13}\text{C}$  NMR spectrum (75 MHz,  $\text{CDCl}_3$ ) of 4-((4-allyl-2-methoxyphenoxy)methyl)-1-benzyl-*1H*-1,2,3-triazole (**23**).

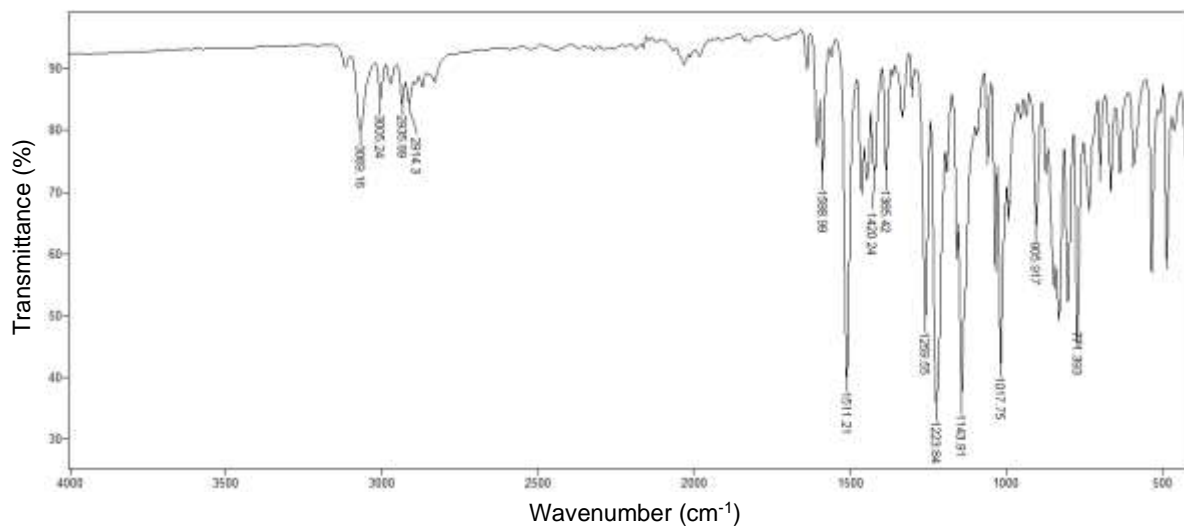

**Fig. D.** IR spectrum (ATR) of 4-((4-allyl-2-methoxyphenoxy)methyl)-1-(4-fluorobenzyl)-*1H*-1,2,3-triazole (**24**).

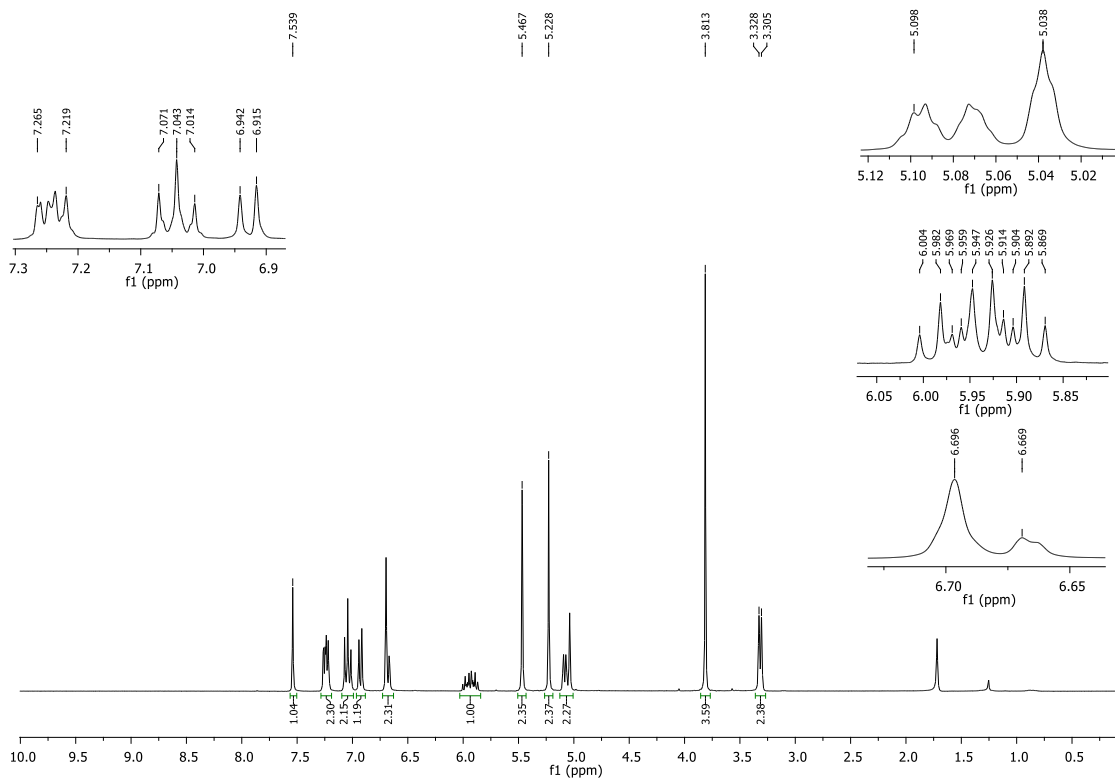

**Fig. E.**  $^1\text{H}$  NMR spectrum (300 MHz,  $\text{CDCl}_3$ ) of 4-((4-allyl-2-methoxyphenoxy)methyl)-1-(4-fluorobenzyl)-*1H*-1,2,3-triazole (**24**).

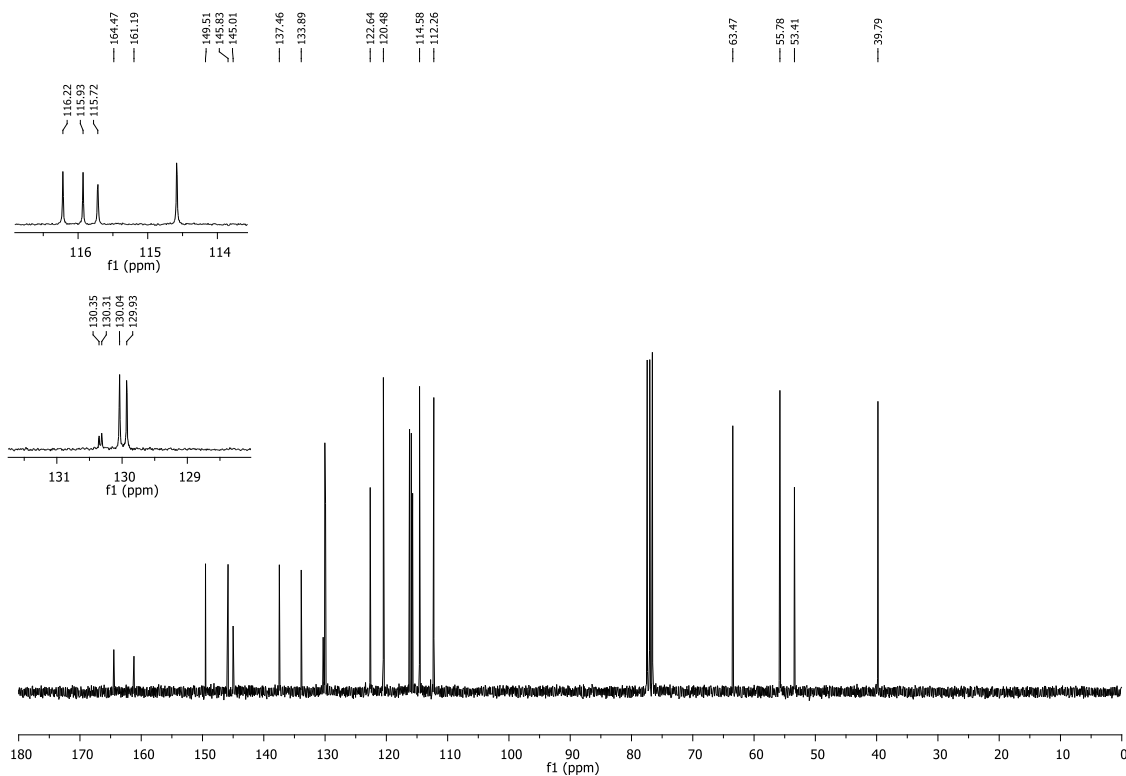

**Fig. F.**  $^{13}\text{C}$  NMR spectrum (75 MHz,  $\text{CDCl}_3$ ) of 4-((4-allyl-2-methoxyphenoxy)methyl)-1-(4-fluorobenzyl)-*1H*-1,2,3-triazole (**24**).

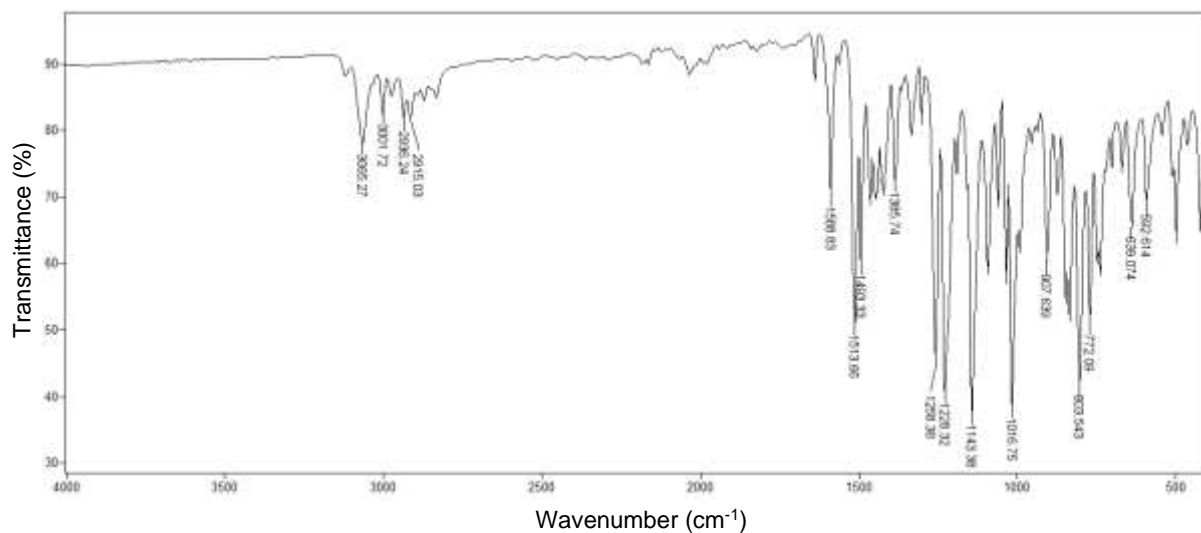

**Fig. G.** IR spectrum (ATR) of 4-((4-allyl-2-methoxyphenoxy)methyl)-1-(4-chlorobenzyl)-1*H*-1,2,3-triazole (**25**).

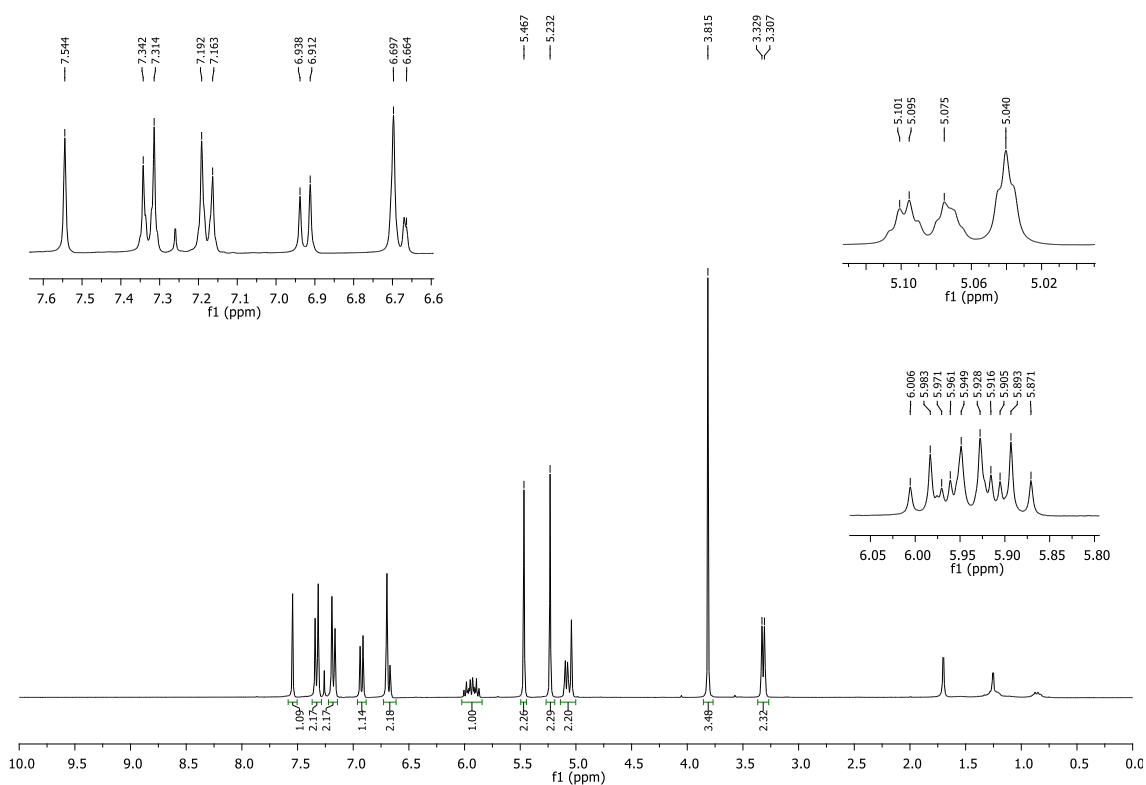

**Fig. H.**  $^1\text{H}$  NMR spectrum (300 MHz,  $\text{CDCl}_3$ ) of 4-((4-allyl-2-methoxyphenoxy)methyl)-1-(4-chlorobenzyl)-1*H*-1,2,3-triazole (**25**).

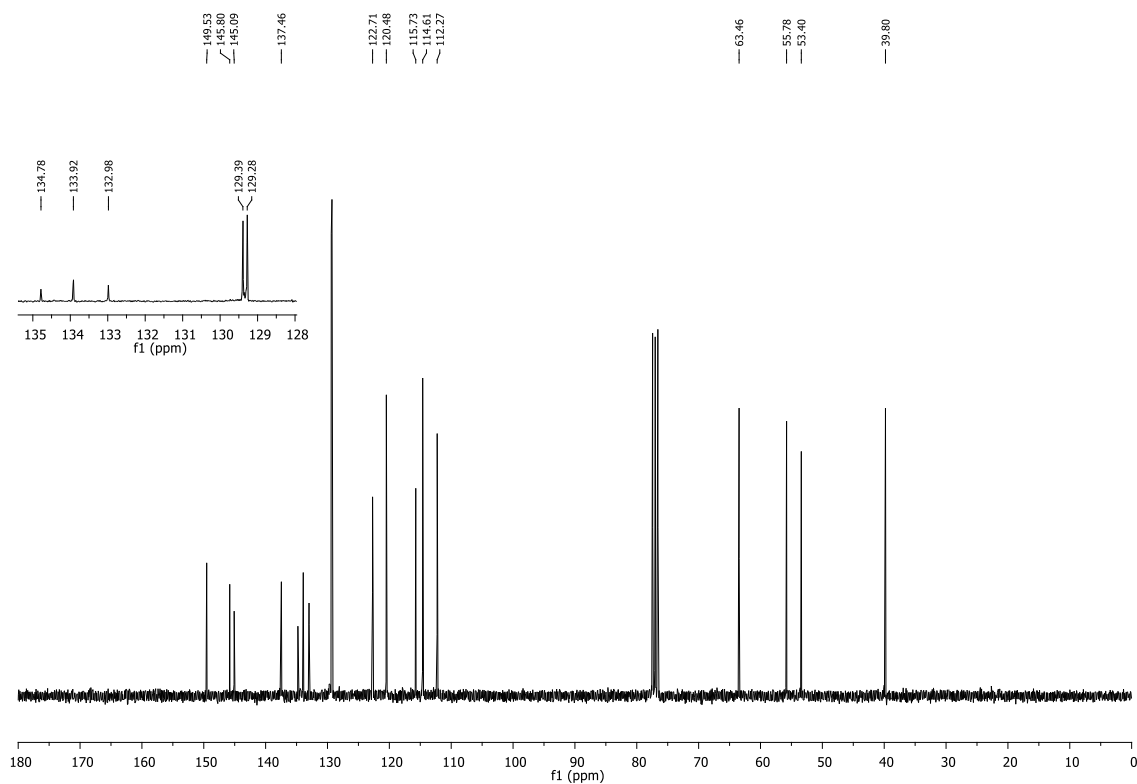

**Fig. I.**  $^{13}\text{C}$  NMR spectrum (75 MHz,  $\text{CDCl}_3$ ) of 4-((4-allyl-2-methoxyphenoxy)methyl)-1-(4-chlorobenzyl)-*1H*-1,2,3-triazole (**25**).

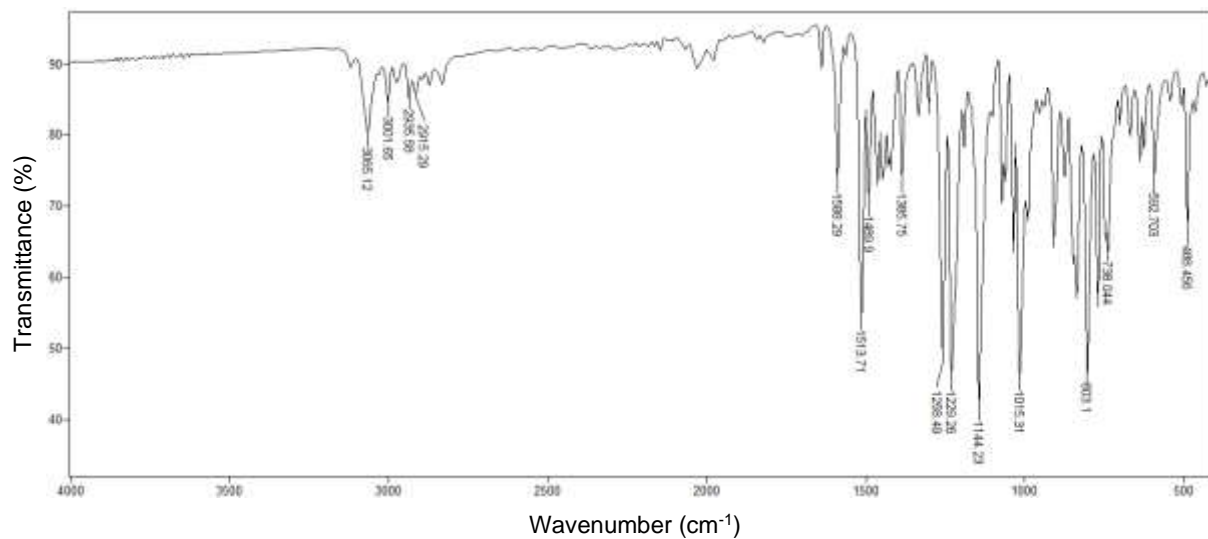

**Fig. J.** IR spectrum (ATR) of 4-((4-allyl-2-methoxyphenoxy)methyl)-1-(4-bromobenzyl)-*1H*-1,2,3-triazole (**26**).

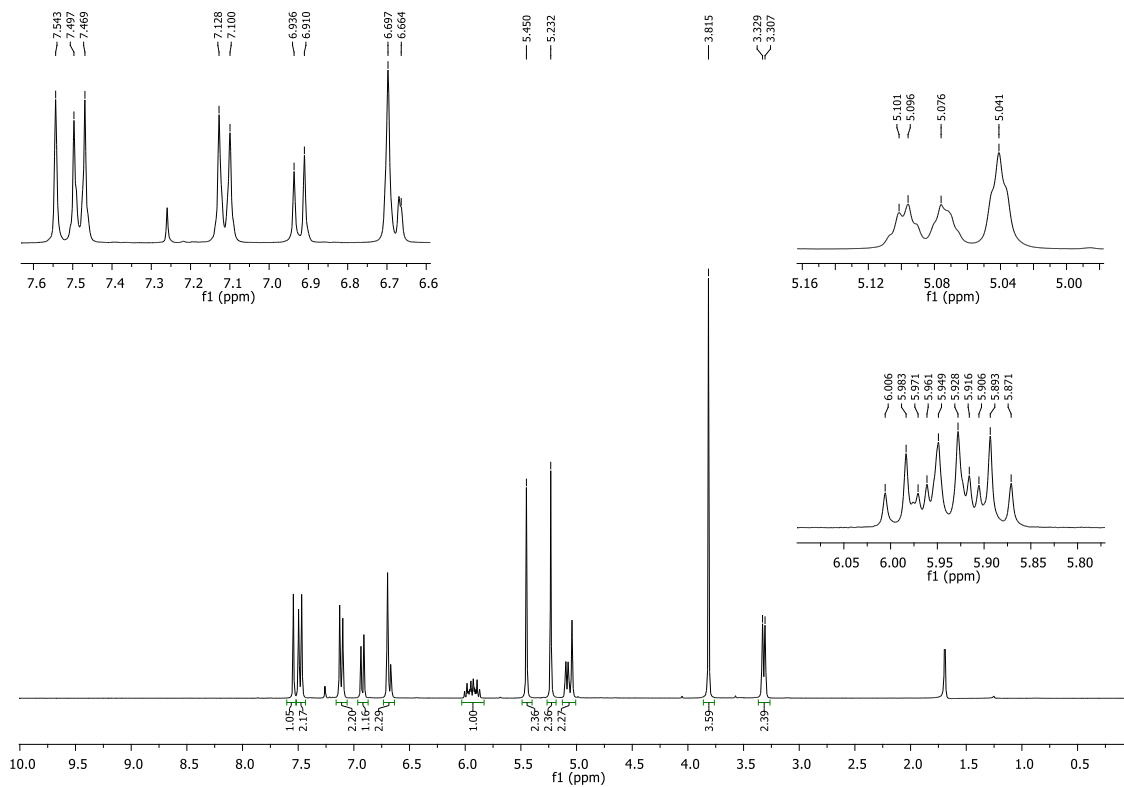

**Fig. K.**  $^1\text{H}$  NMR spectrum (300 MHz,  $\text{CDCl}_3$ ) of 4-((4-allyl-2-methoxyphenoxy)methyl)-1-(4-bromobenzyl)-1*H*-1,2,3-triazole (**26**).

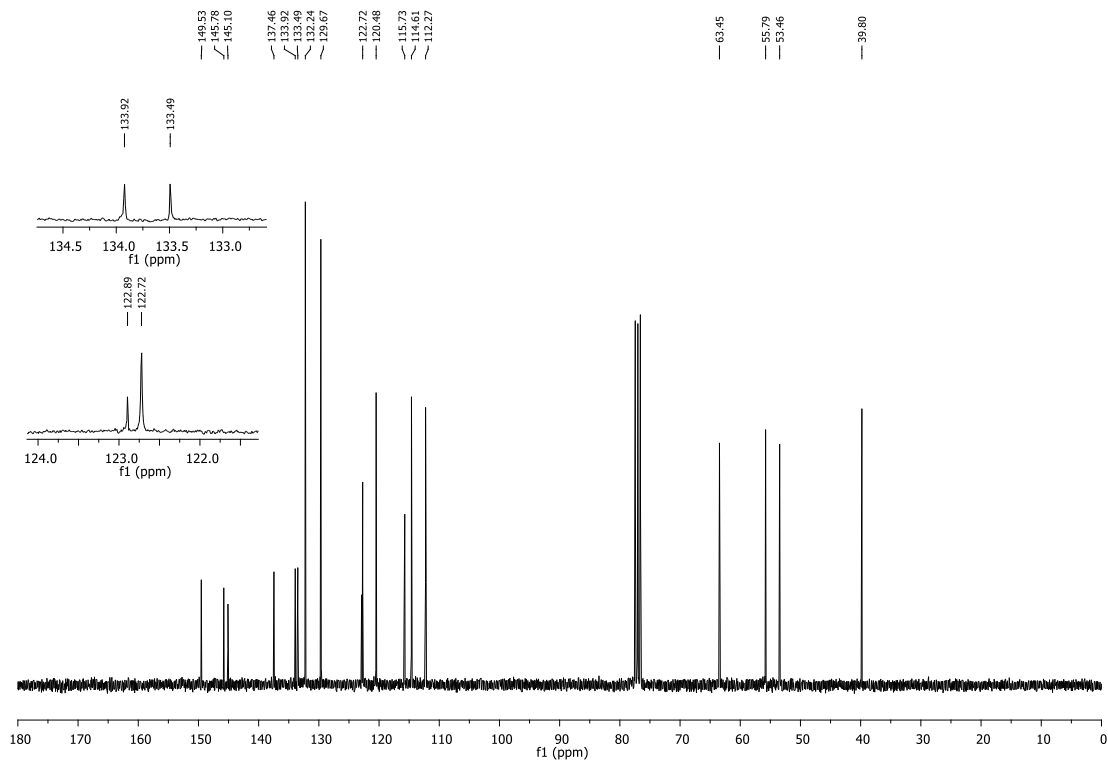

**Fig. L.**  $^{13}\text{C}$  NMR spectrum (75 MHz,  $\text{CDCl}_3$ ) of 4-((4-allyl-2-methoxyphenoxy)methyl)-1-(4-bromobenzyl)-1*H*-1,2,3-triazole (**26**).

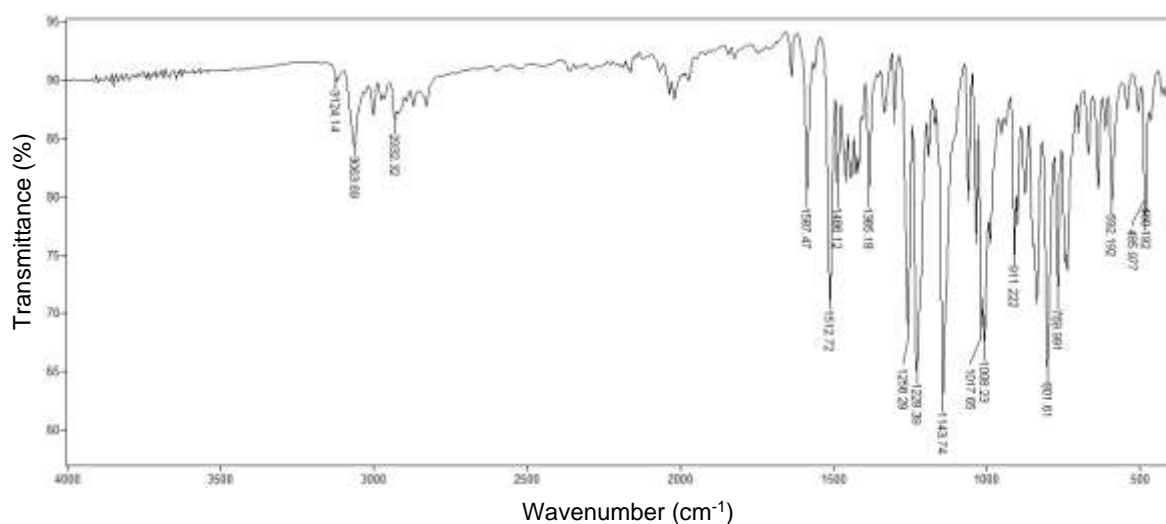

**Fig. M.** IR spectrum (ATR) of 4-((4-allyl-2-methoxyphenoxy)methyl)-1-(4-iodobenzyl)-1*H*-1,2,3-triazole (**27**).

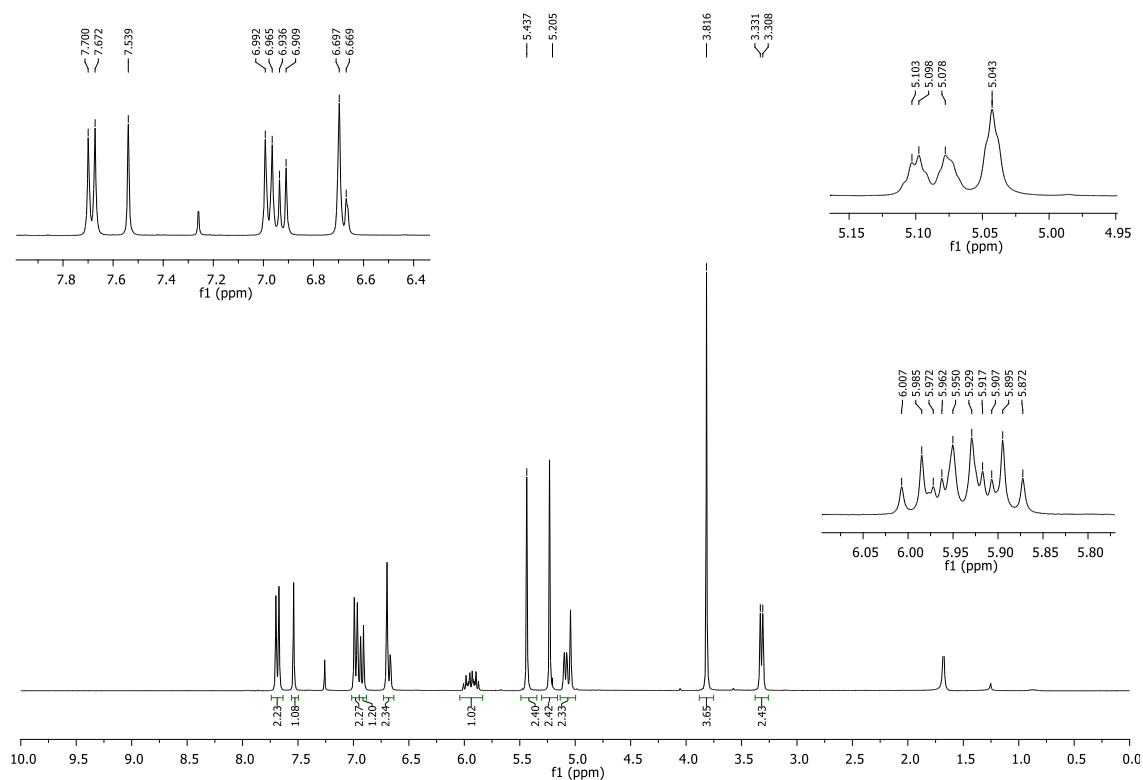

**Fig. N.**  $^1\text{H}$  NMR spectrum (300 MHz,  $\text{CDCl}_3$ ) of 4-((4-allyl-2-methoxyphenoxy)methyl)-1-(4-iodobenzyl)-1*H*-1,2,3-triazole (**27**).

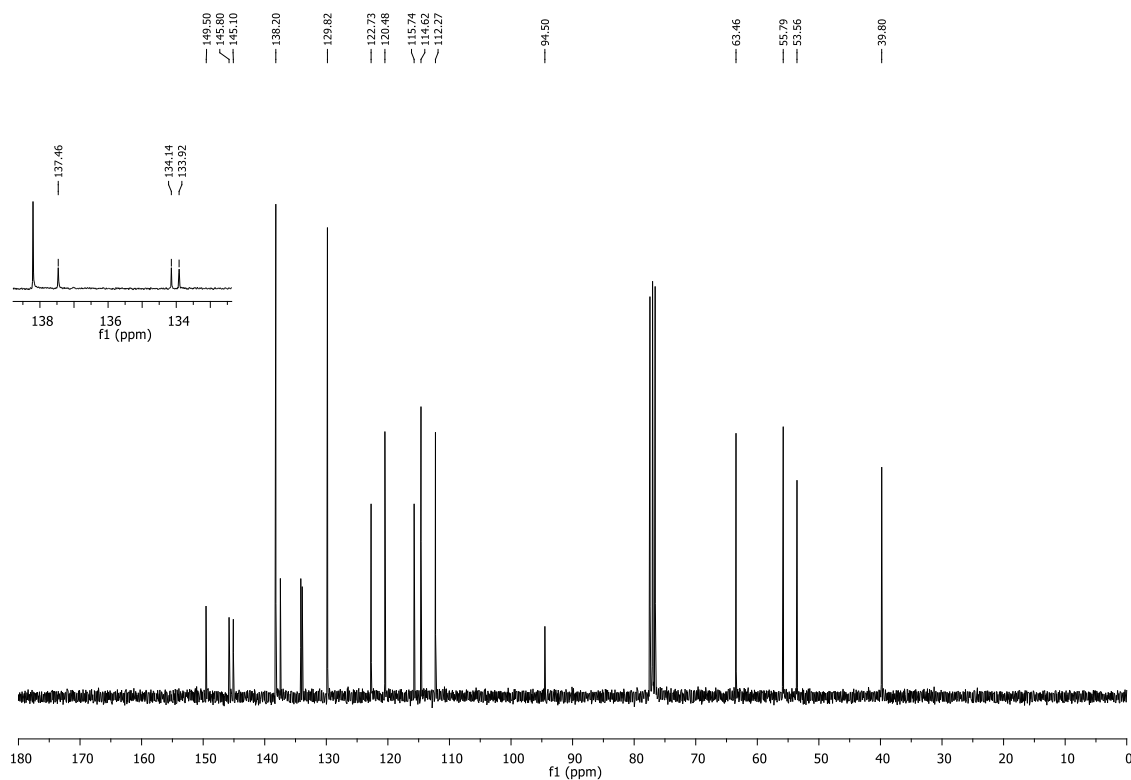

**Fig. O.**  $^{13}\text{C}$  NMR spectrum (75 MHz,  $\text{CDCl}_3$ ) of 4-((4-allyl-2-methoxyphenoxy)methyl)-1-(4-iodobenzyl)-*1H*-1,2,3-triazole (**27**).

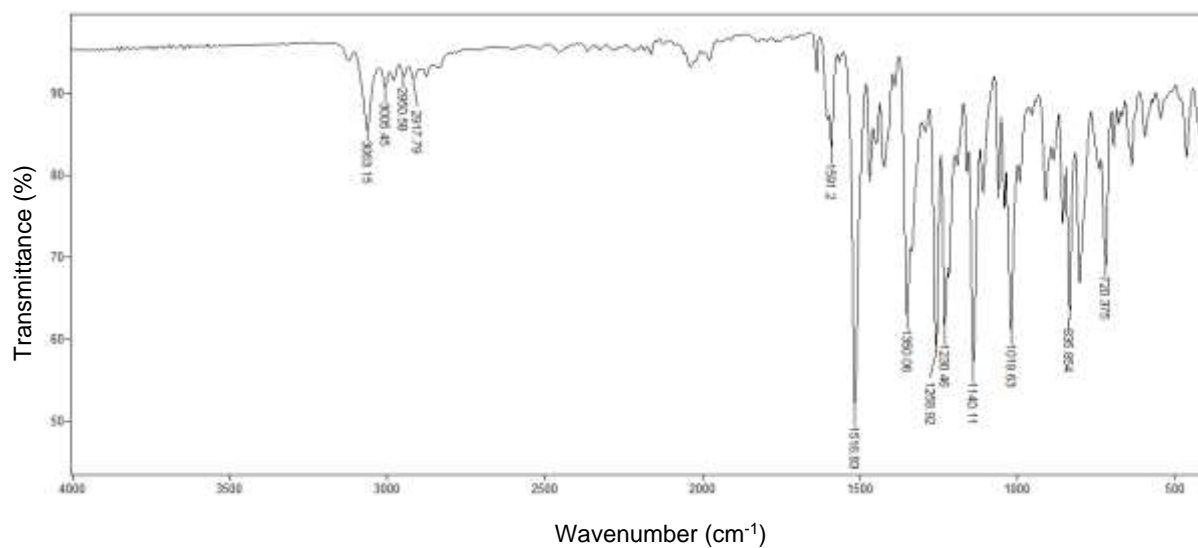

**Fig. P.** IR spectrum (ATR) of 4-((4-allyl-2-methoxyphenoxy)methyl)-1-(4-nitrobenzyl)-*1H*-1,2,3-triazole (**28**).

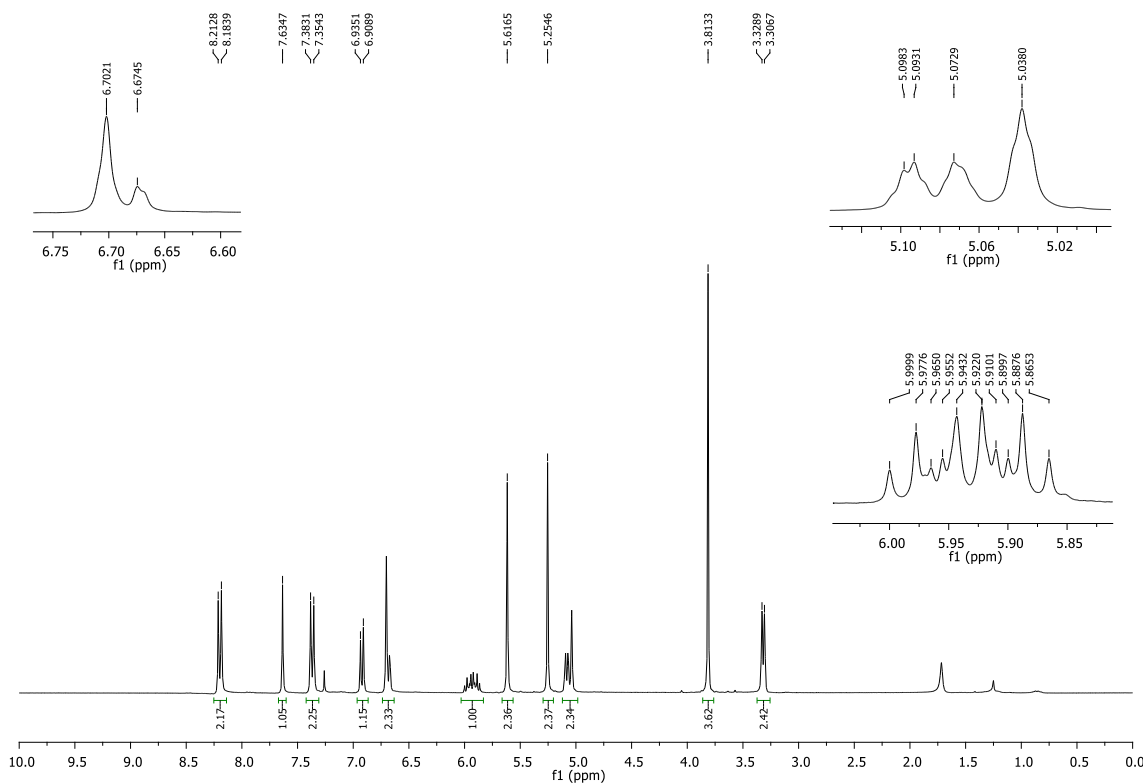

**Fig. Q.**  $^1\text{H}$  NMR spectrum (300 MHz,  $\text{CDCl}_3$ ) of 4-((4-allyl-2-methoxyphenoxy)methyl)-1-(4-nitrobenzyl)-*1H*-1,2,3-triazole (**28**).

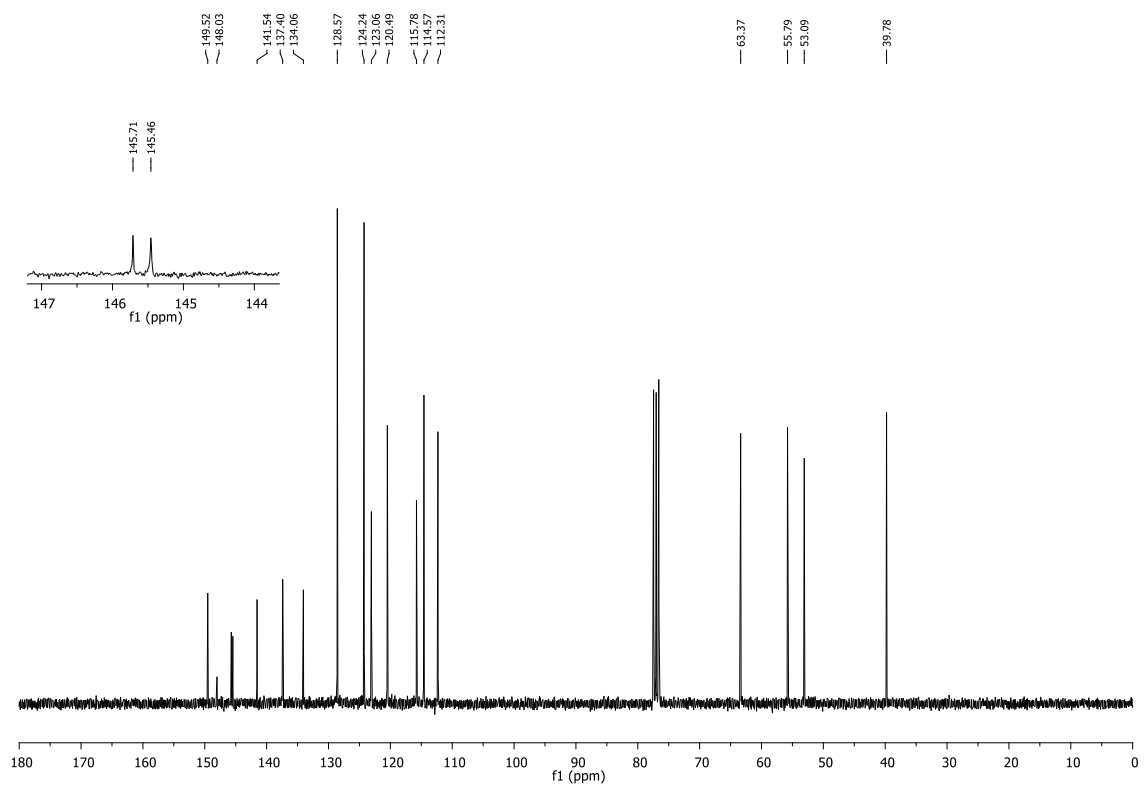

**Fig. R.**  $^{13}\text{C}$  NMR spectrum (75 MHz,  $\text{CDCl}_3$ ) of 4-((4-allyl-2-methoxyphenoxy)methyl)-1-(4-nitrobenzyl)-*1H*-1,2,3-triazole (**28**).



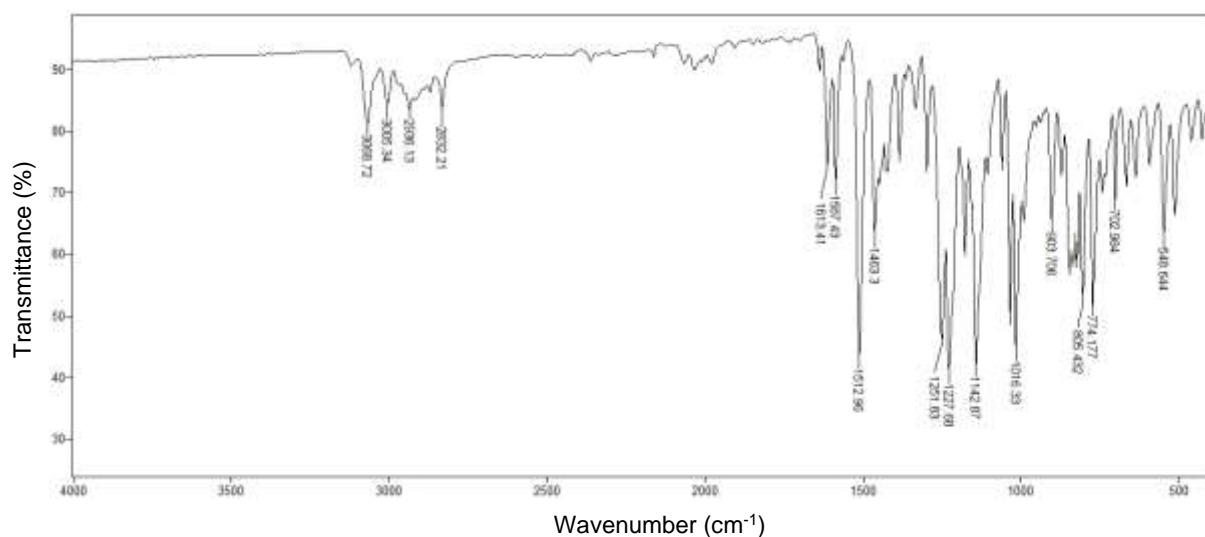

**Fig. S.** IR spectrum (ATR) of 4-((4-allyl-2-methoxyphenoxy)methyl)-1-(4-methoxybenzyl)-1H-1,2,3-triazole (**29**).

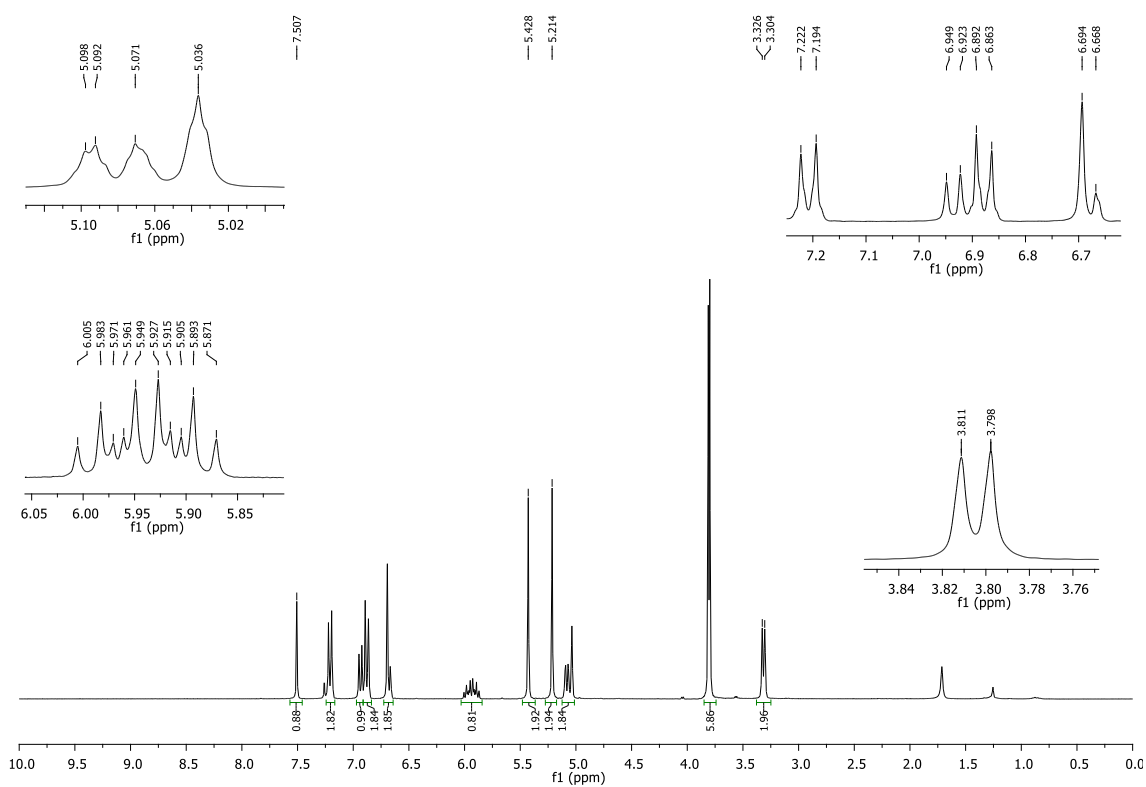

**Fig. T.**  $^1\text{H}$  NMR spectrum (300 MHz,  $\text{CDCl}_3$ ) of 4-((4-allyl-2-methoxyphenoxy)methyl)-1-(4-methoxybenzyl)-1H-1,2,3-triazole (**29**).

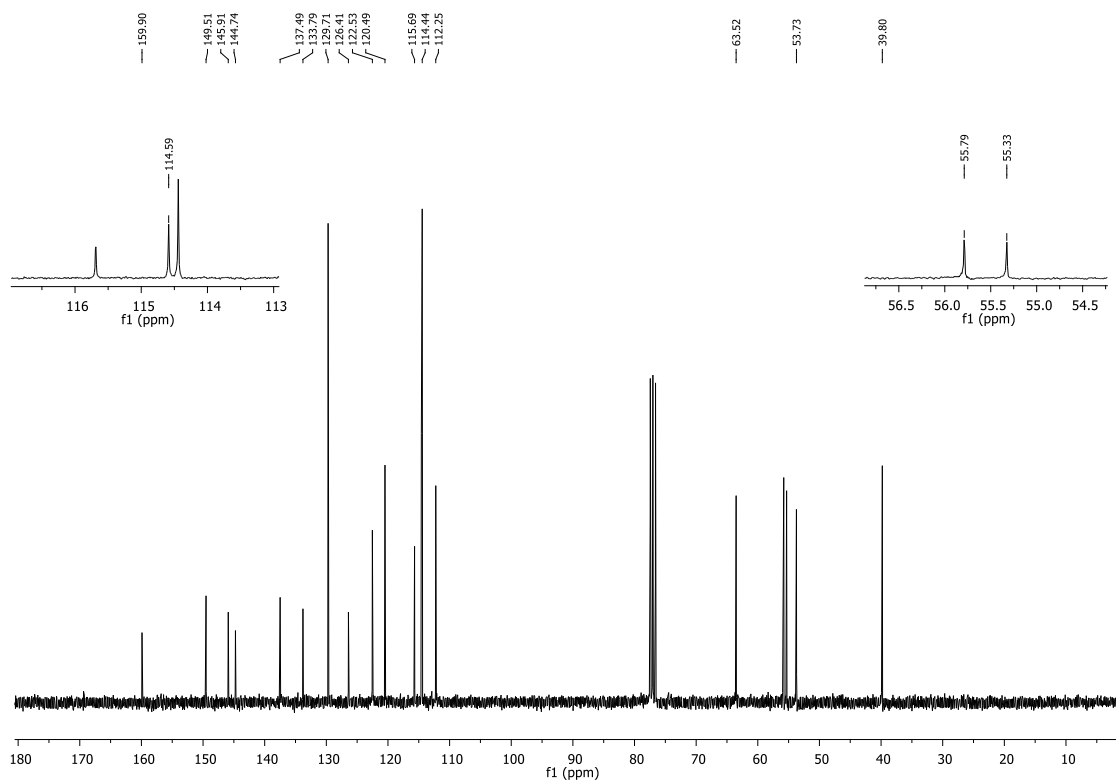

**Fig. U.**  $^{13}\text{C}$  NMR spectrum (75 MHz,  $\text{CDCl}_3$ ) of 4-((4-allyl-2-methoxyphenoxy)methyl)-1-(4-methoxybenzyl)-*1H*-1,2,3-triazole (**29**).

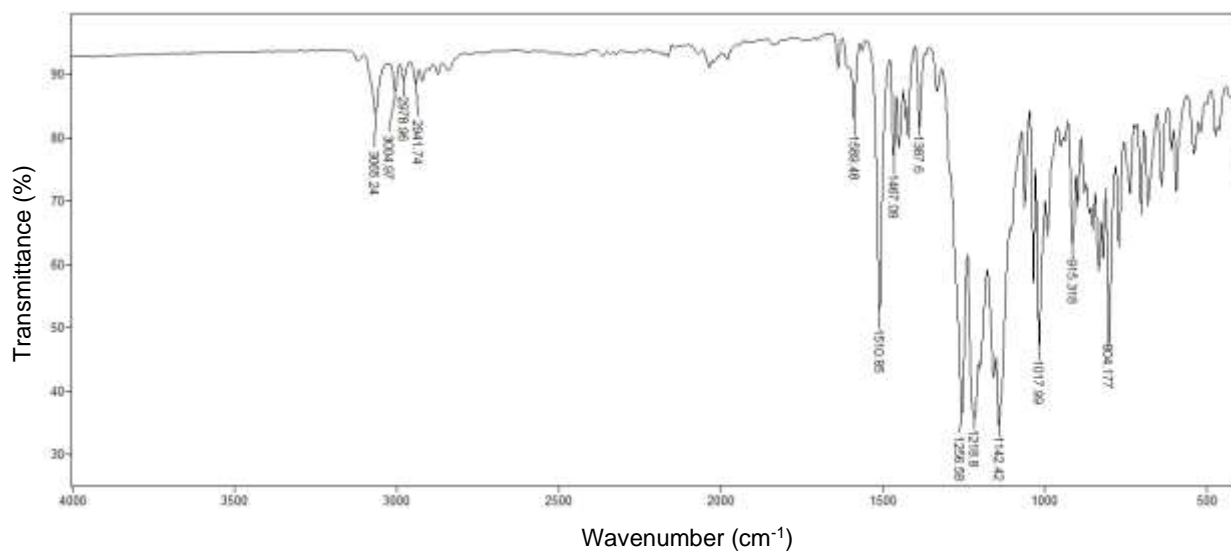

**Fig. V.** IR spectrum (ATR) of 4-((4-allyl-2-methoxyphenoxy)methyl)-1-(4-(trifluoromethoxy)benzyl)-*1H*-1,2,3-triazole (**30**).

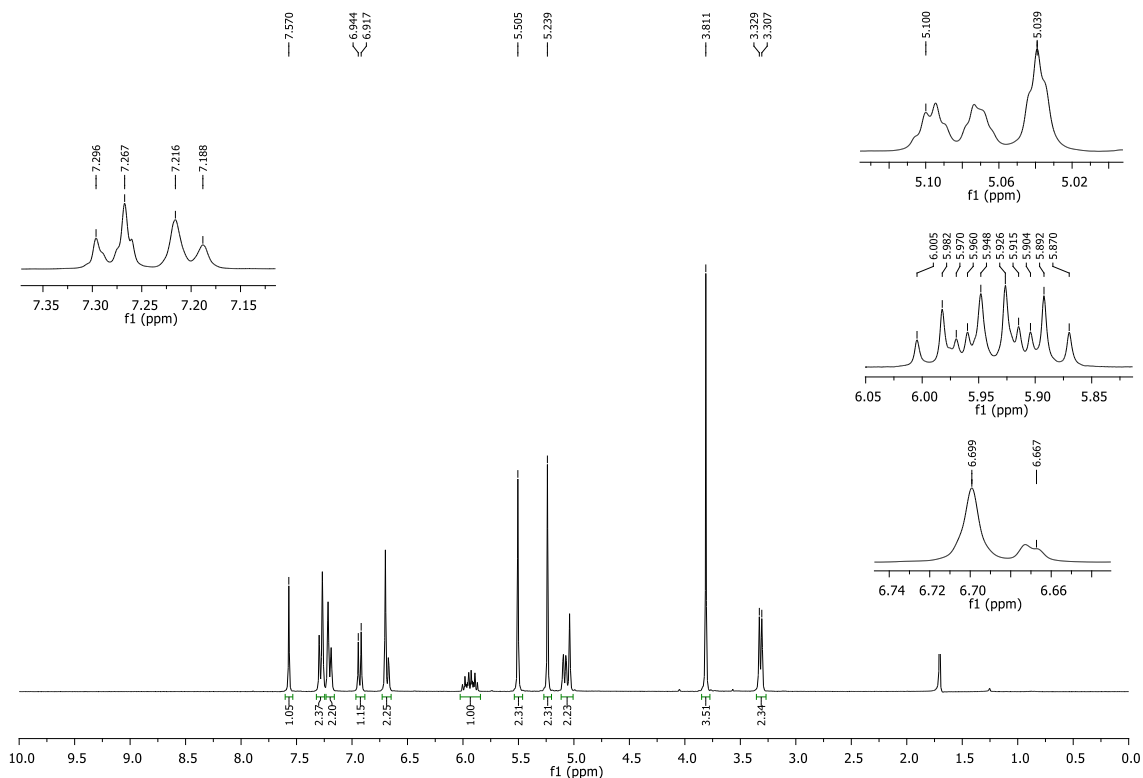

**Fig. X.**  $^1\text{H}$  NMR spectrum (300 MHz,  $\text{CDCl}_3$ ) 4-((4-allyl-2-methoxyphenoxy)methyl)-1-(4-(trifluoromethoxy)benzyl)-*1H*-1,2,3-triazole (**30**).

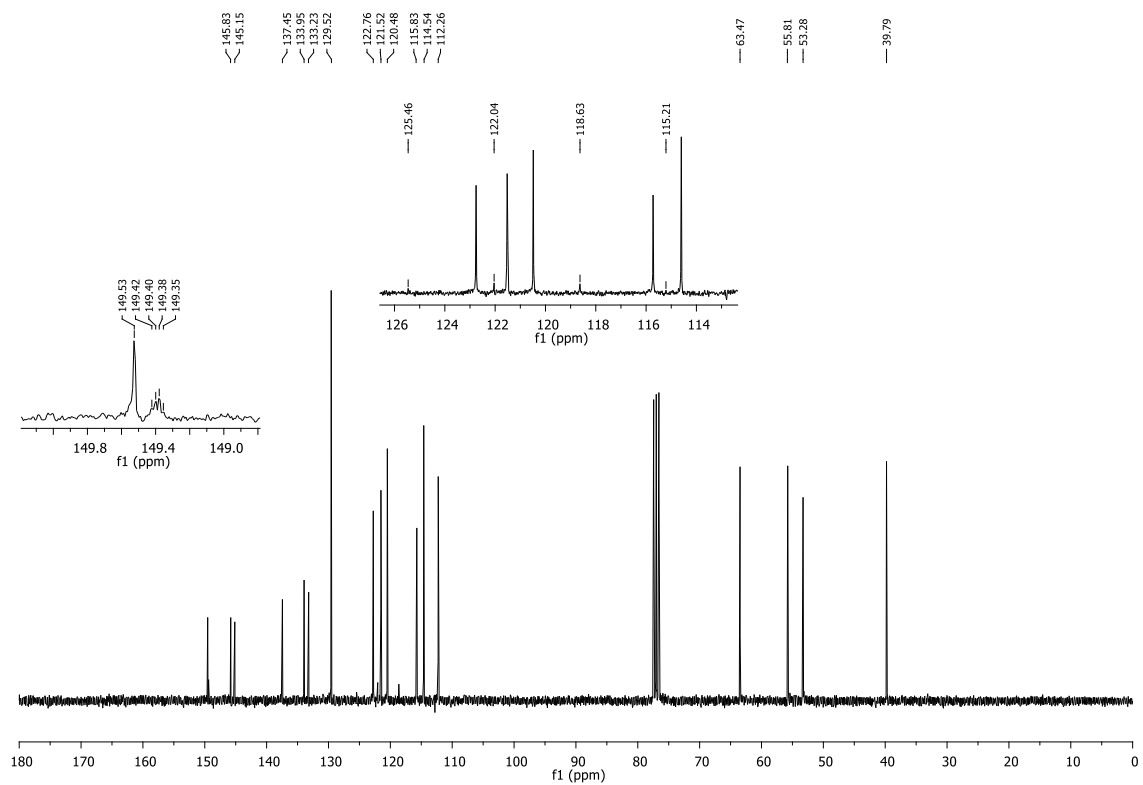

**Fig. W.**  $^{13}\text{C}$  NMR spectrum (75 MHz,  $\text{CDCl}_3$ ) of 4-((4-allyl-2-methoxyphenoxy)methyl)-1-(4-(trifluoromethoxy)benzyl)-*1H*-1,2,3-triazole (**30**).

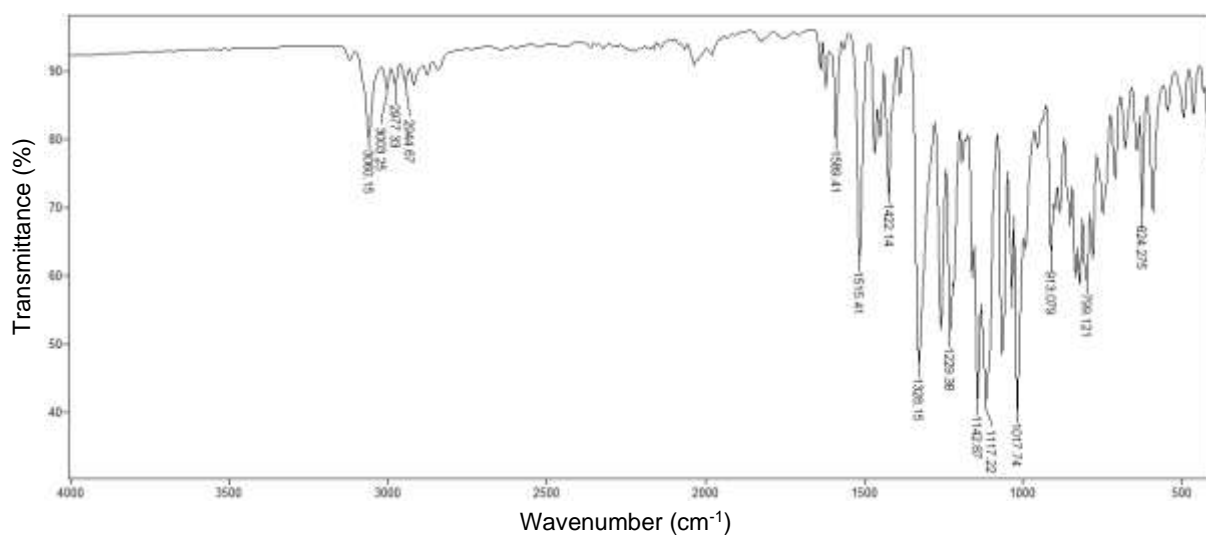

**Fig. Y.** IR spectrum (ATR) of 4-((4-allyl-2-methoxyphenoxy)methyl)-1-(4-(trifluoromethyl)benzyl)-1*H*-1,2,3-triazole (**31**).

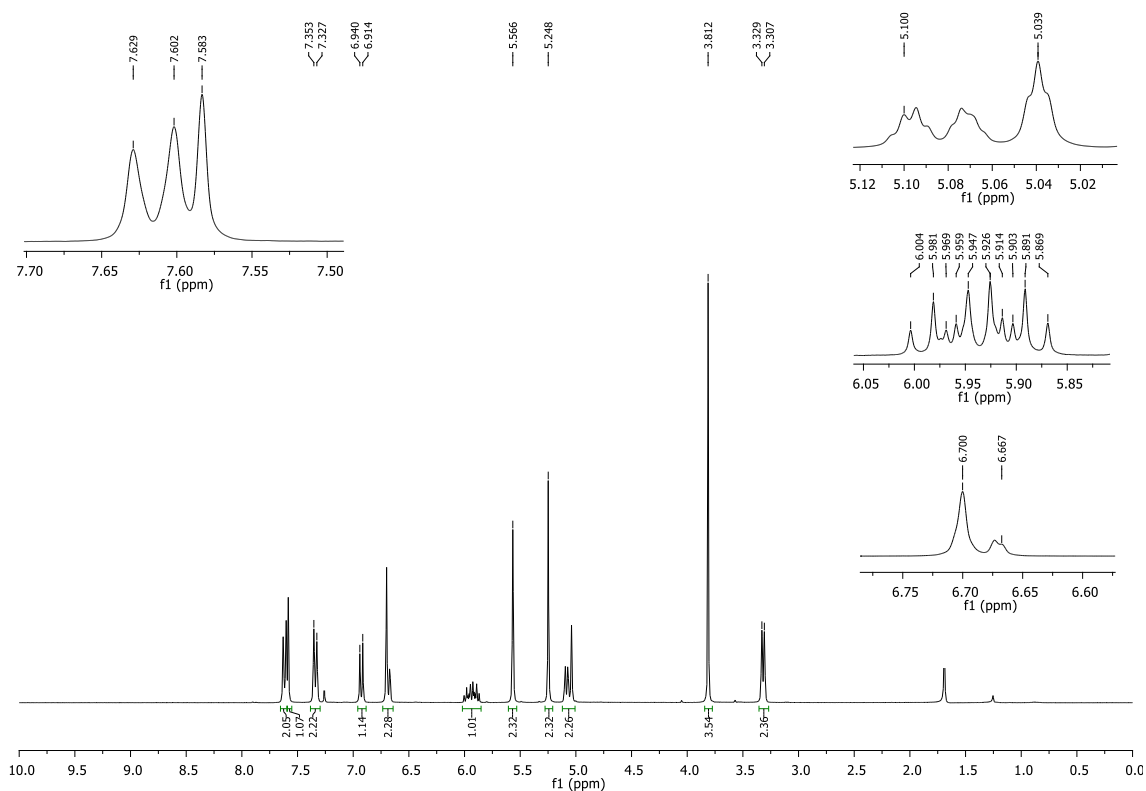

**Fig. Z.**  $^1\text{H}$  NMR spectrum (300 MHz,  $\text{CDCl}_3$ ) of 4-((4-allyl-2-methoxyphenoxy)methyl)-1-(4-(trifluoromethyl)benzyl)-1*H*-1,2,3-triazole (**31**).

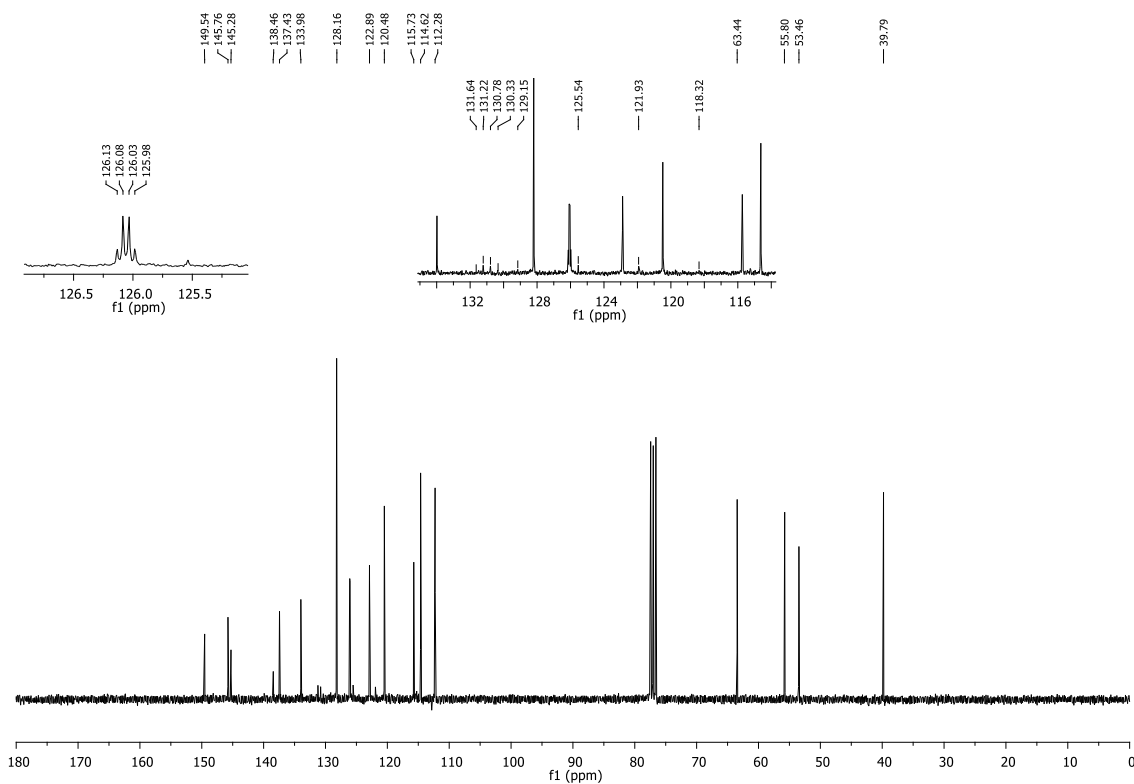

**Fig. AA.**  $^{13}\text{C}$  NMR spectrum (75 MHz,  $\text{CDCl}_3$ ) of 4-((4-allyl-2-methoxyphenoxy)methyl)-1-(4-(trifluoromethyl)benzyl)-*1H*-1,2,3-triazole (**31**).

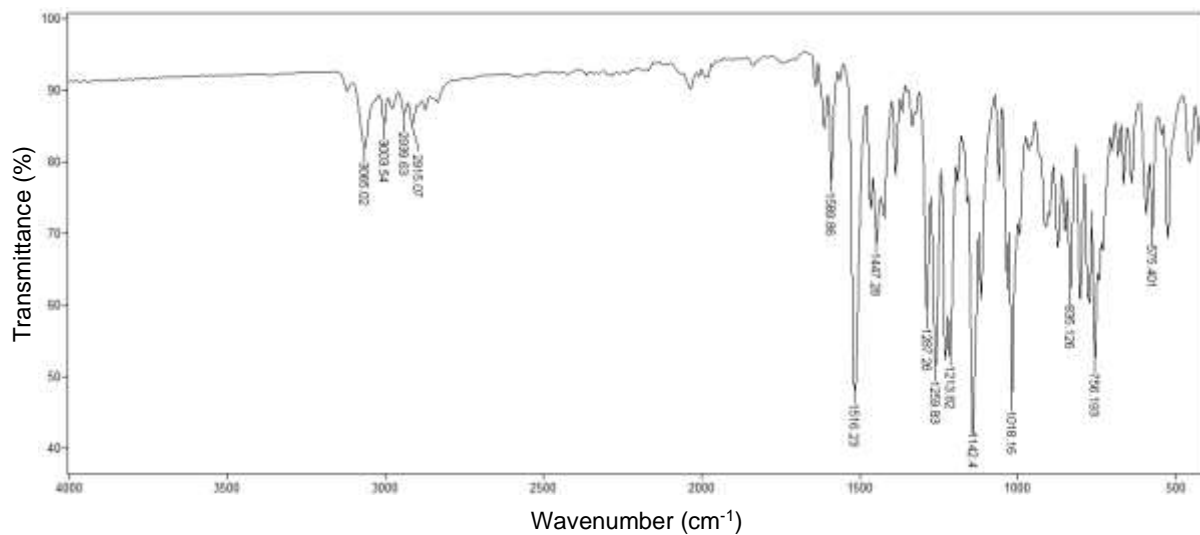

**Fig. AB.** IR spectrum (ATR) of 4-((4-allyl-2-methoxyphenoxy)methyl)-1-(3,4-difluorobenzyl)-*1H*-1,2,3-triazole (**32**).

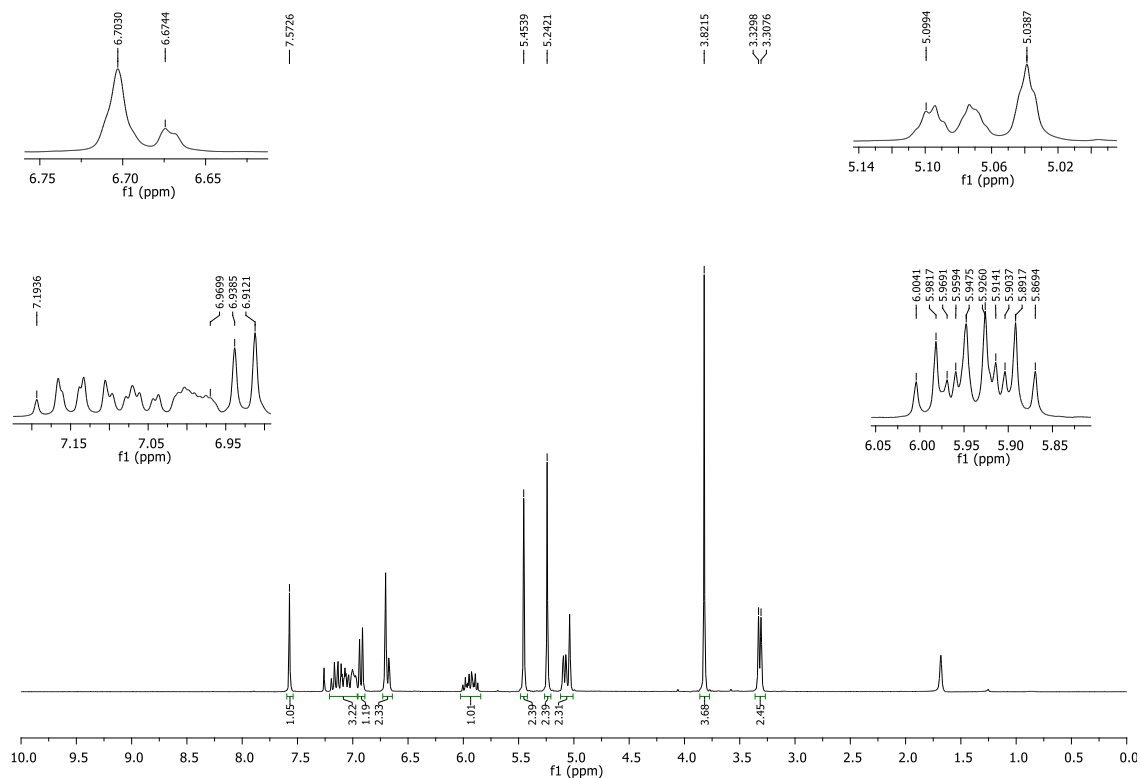

**Fig. AC.**  $^1\text{H}$  NMR spectrum (300 MHz,  $\text{CDCl}_3$ ) of 4-((4-allyl-2-methoxyphenoxy)methyl)-1-(3,4-difluorobenzyl)-*1H*-1,2,3-triazole (**32**).

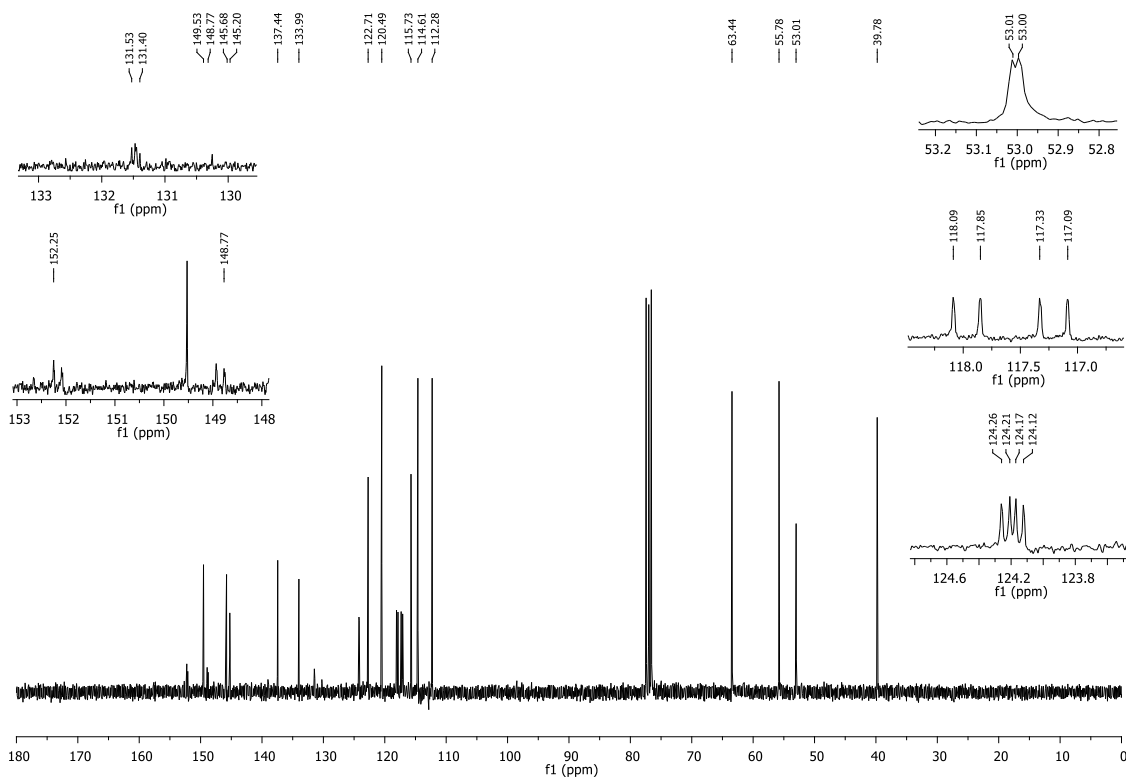

**Fig. AD.**  $^{13}\text{C}$  NMR spectrum (75 MHz,  $\text{CDCl}_3$ ) of 4-((4-allyl-2-methoxyphenoxy)methyl)-1-(3,4-difluorobenzyl)-*1H*-1,2,3-triazole (**32**).

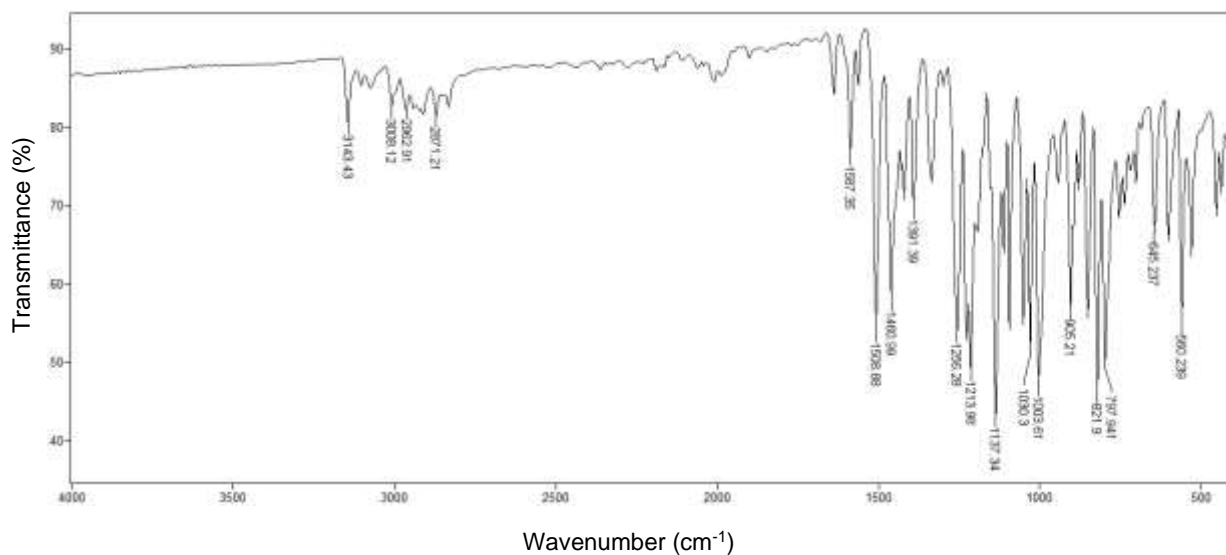

**Fig. AE.** IR spectrum (ATR) of 4-((4-allyl-2-methoxyphenoxy)methyl)-1-(2,5-dichlorobenzyl)-1*H*-1,2,3-triazole (**33**).

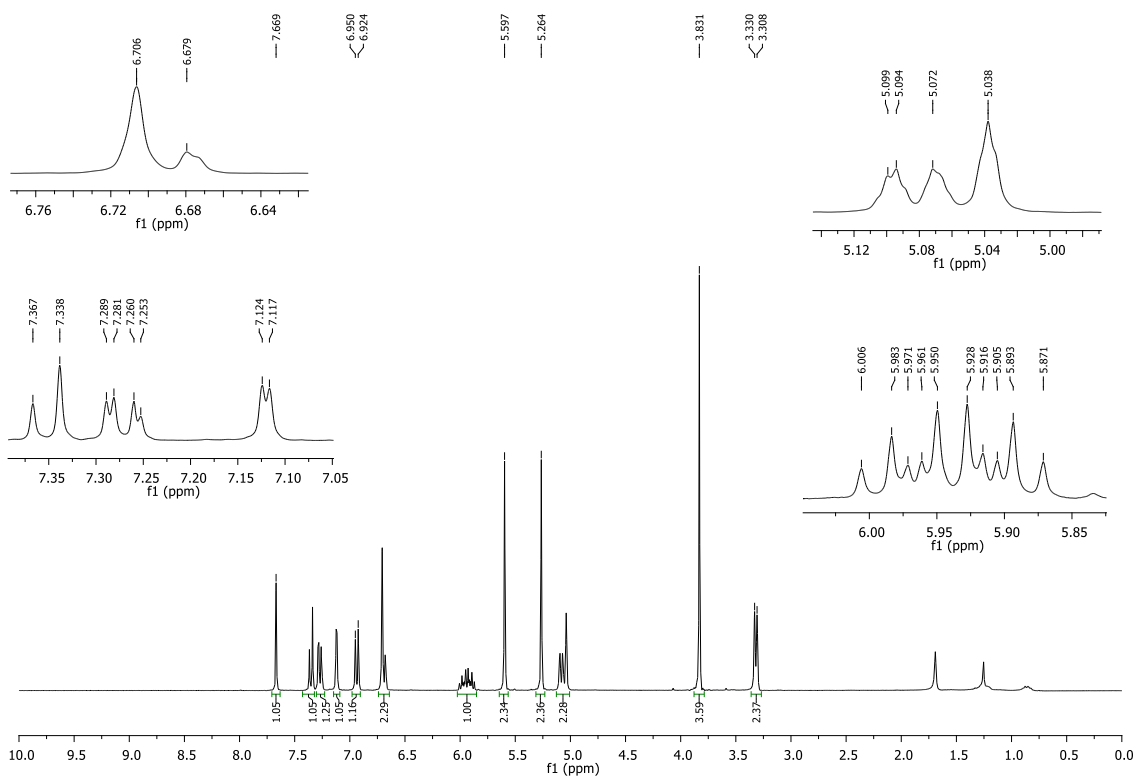

**Fig. AF.**  $^1\text{H}$  NMR spectrum (300 MHz,  $\text{CDCl}_3$ ) of 4-((4-allyl-2-methoxyphenoxy)methyl)-1-(2,5-dichlorobenzyl)-1*H*-1,2,3-triazole (**33**).

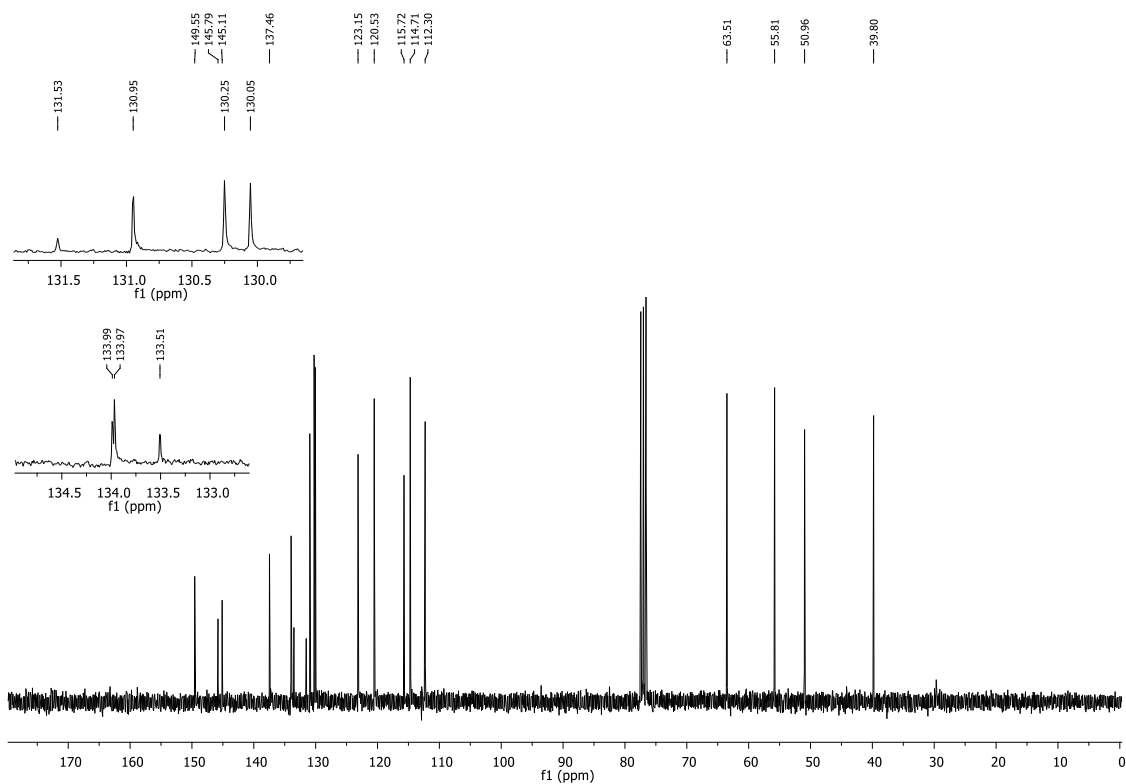

**Fig. AG.**  $^{13}\text{C}$  NMR spectrum (75 MHz,  $\text{CDCl}_3$ ) of 4-((4-allyl-2-methoxyphenoxy)methyl)-1-(2,5-dichlorobenzyl)-*1H*-1,2,3-triazole (**33**).

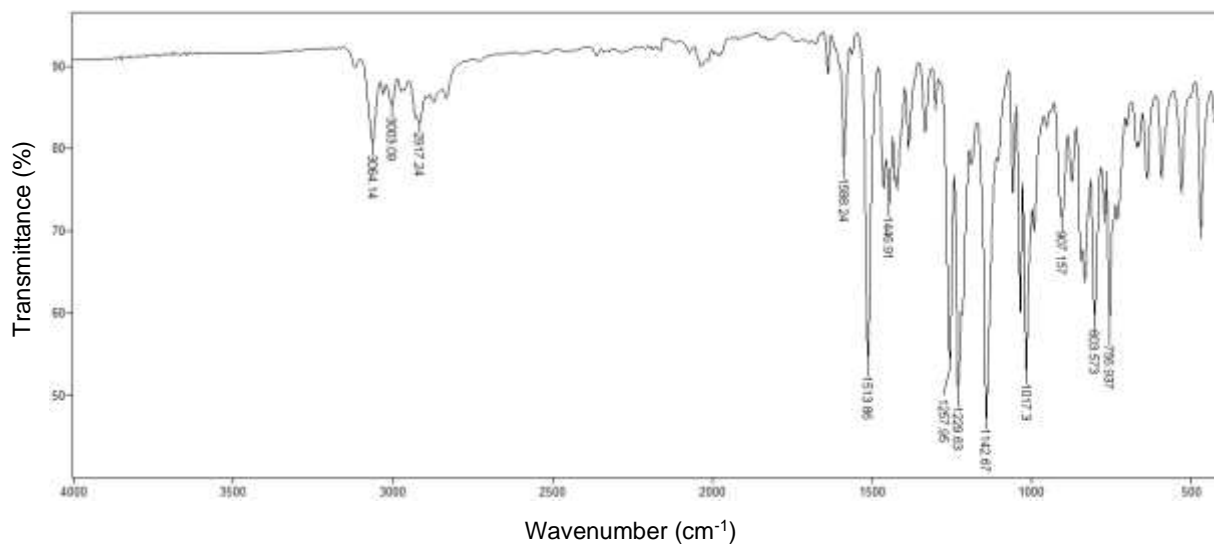

**Fig. AH.** IR spectrum (ATR) of 4-((4-allyl-2-methoxyphenoxy)methyl)-1-(4-methylbenzyl)-*1H*-1,2,3-triazole (**34**).



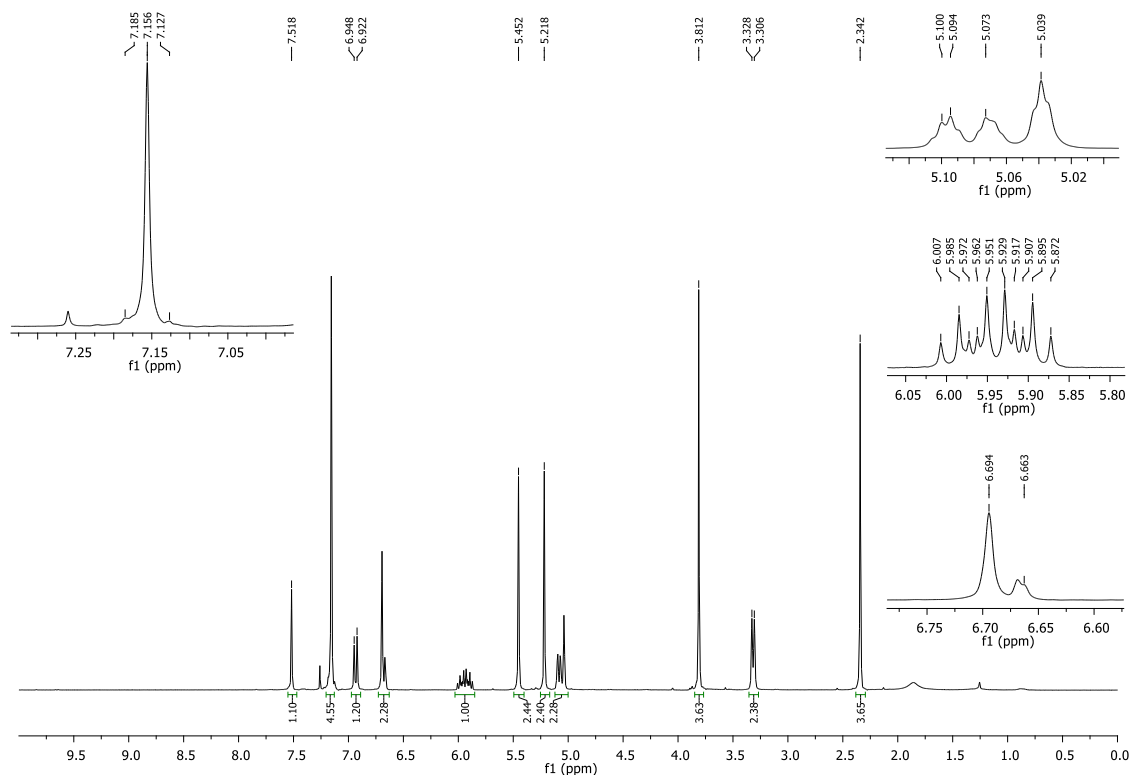

**Fig. A1.**  $^1\text{H}$  NMR spectrum (300 MHz,  $\text{CDCl}_3$ ) of 4-((4-allyl-2-methoxyphenoxy)methyl)-1-(4-methylbenzyl)-*1H*-1,2,3-triazole (**34**).

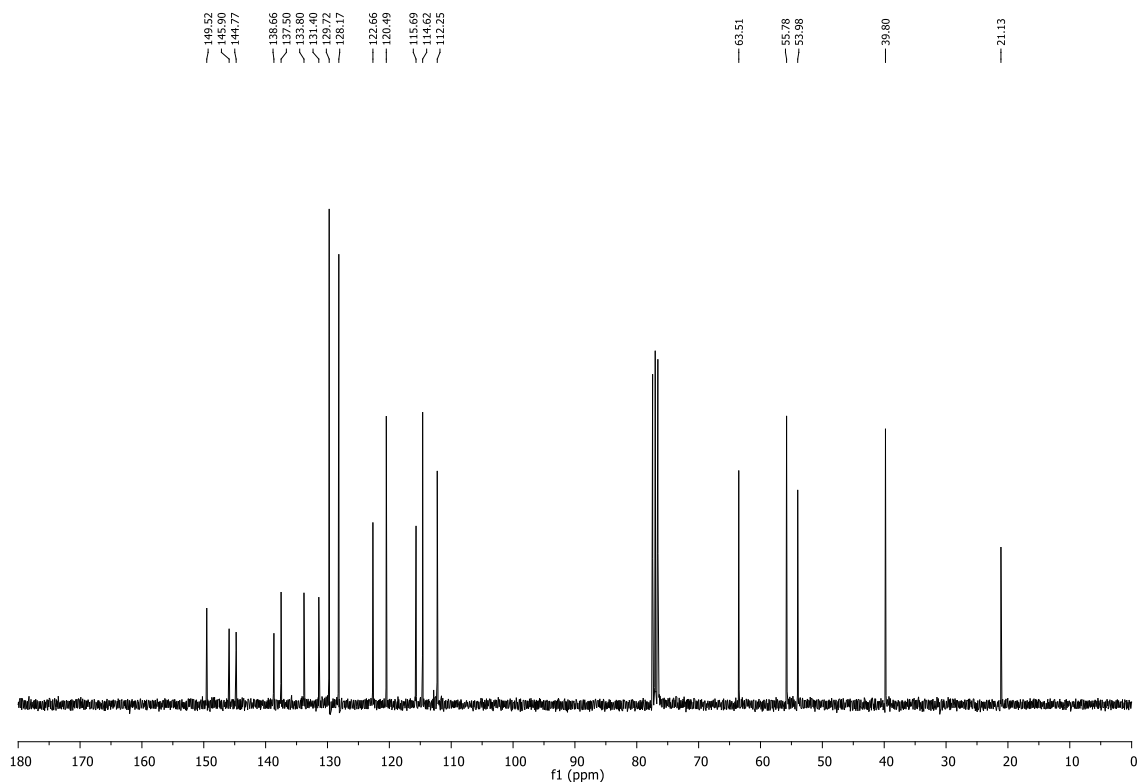

**Fig. A2.**  $^{13}\text{C}$  NMR spectrum (75 MHz,  $\text{CDCl}_3$ ) of 4-((4-allyl-2-methoxyphenoxy)methyl)-1-(4-methylbenzyl)-*1H*-1,2,3-triazole (**34**).

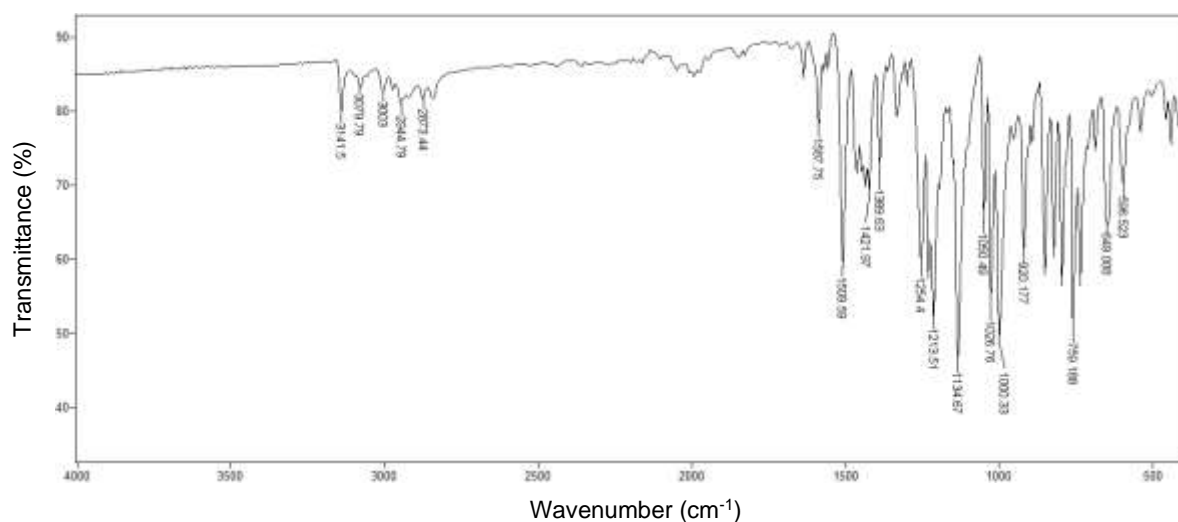

**Fig. AK.** IR spectrum (ATR) of 4-((4-allyl-2-methoxyphenoxy)methyl)-1-(2-bromobenzyl)-1*H*-1,2,3-triazole (**35**).

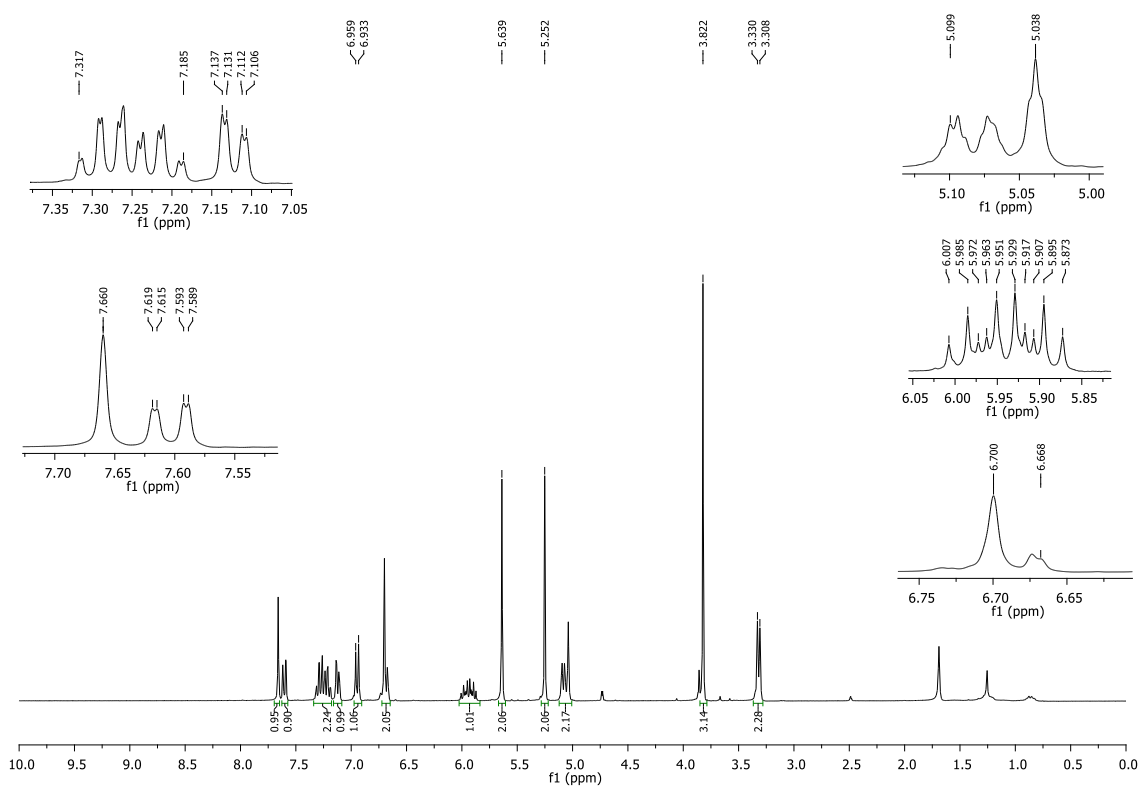

**Fig. AL.**  $^1\text{H}$  NMR spectrum (300 MHz,  $\text{CDCl}_3$ ) of 4-((4-allyl-2-methoxyphenoxy)methyl)-1-(2-bromobenzyl)-1*H*-1,2,3-triazole (**35**).

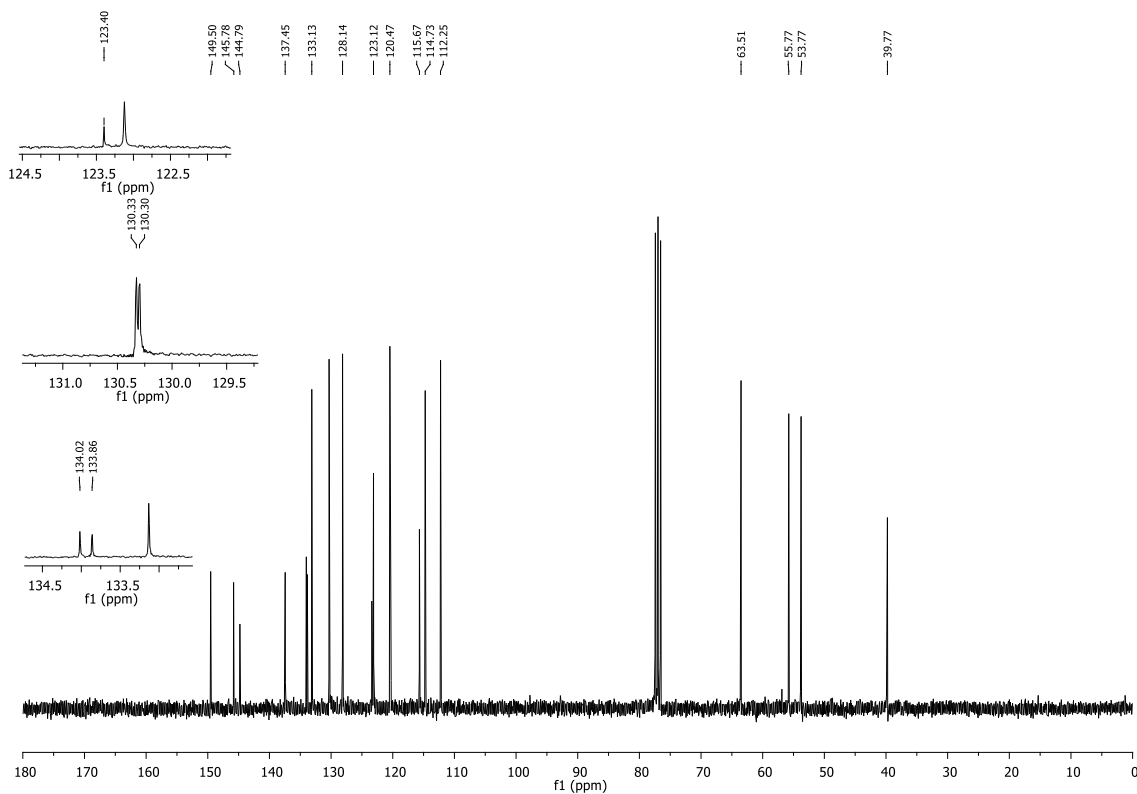

**Fig. AM.**  $^{13}\text{C}$  NMR spectrum (75 MHz,  $\text{CDCl}_3$ ) of 4-((4-allyl-2-methoxyphenoxy)methyl)-1-(2-bromobenzyl)-1H-1,2,3-triazole (**35**).

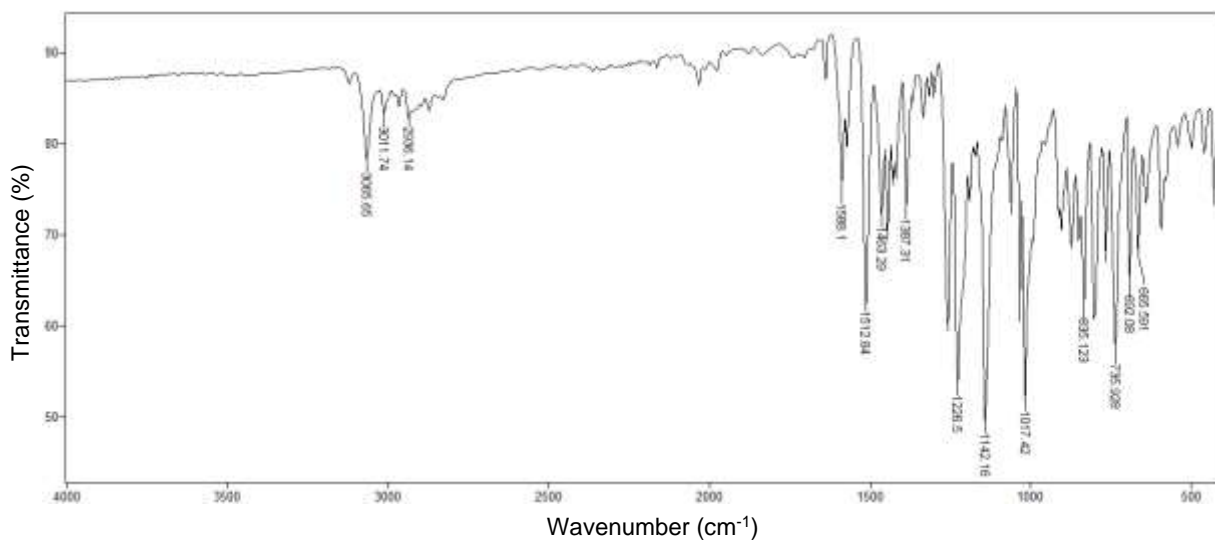

**Fig. AN.** IR spectrum (ATR) of 4-((4-allyl-2-methoxyphenoxy)methyl)-1-(3-bromobenzyl)-1H-1,2,3-triazole (**36**).

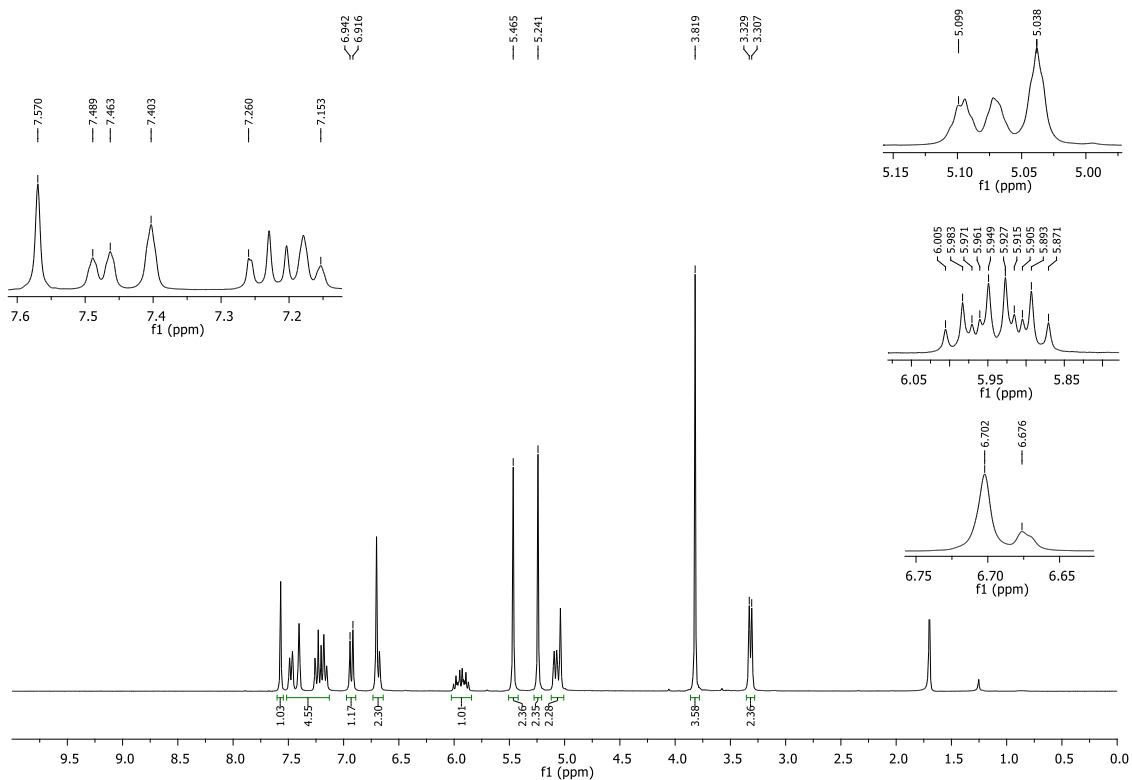

**Fig. AO.**  $^1\text{H}$  NMR spectrum (300 MHz,  $\text{CDCl}_3$ ) of 4-((4-allyl-2-methoxyphenoxy)methyl)-1-(3-bromobenzyl)-*1H*-1,2,3-triazole (**36**).

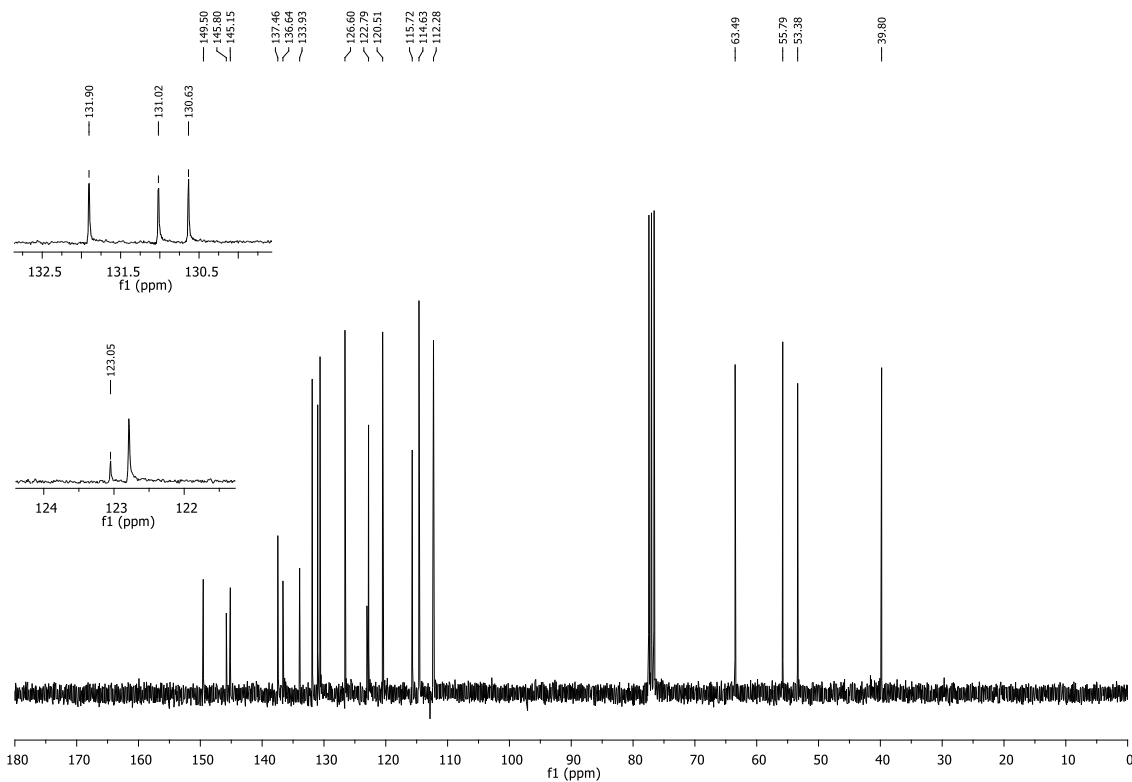

**Fig. AP.**  $^{13}\text{C}$  NMR spectrum (75 MHz,  $\text{CDCl}_3$ ) of 4-((4-allyl-2-methoxyphenoxy)methyl)-1-(3-bromobenzyl)-*1H*-1,2,3-triazole (**36**).

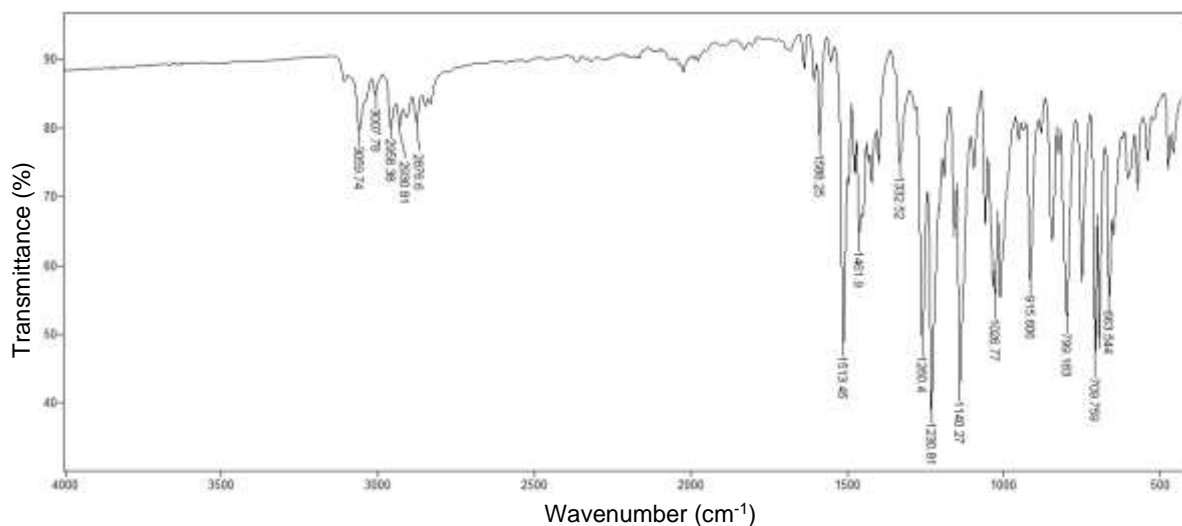

**Fig. AQ.** IR spectrum (ATR) of 4-(3-(4-allyl-2-methoxyphenoxy)propyl)-1-benzyl-1*H*-1,2,3-triazole (**37**).

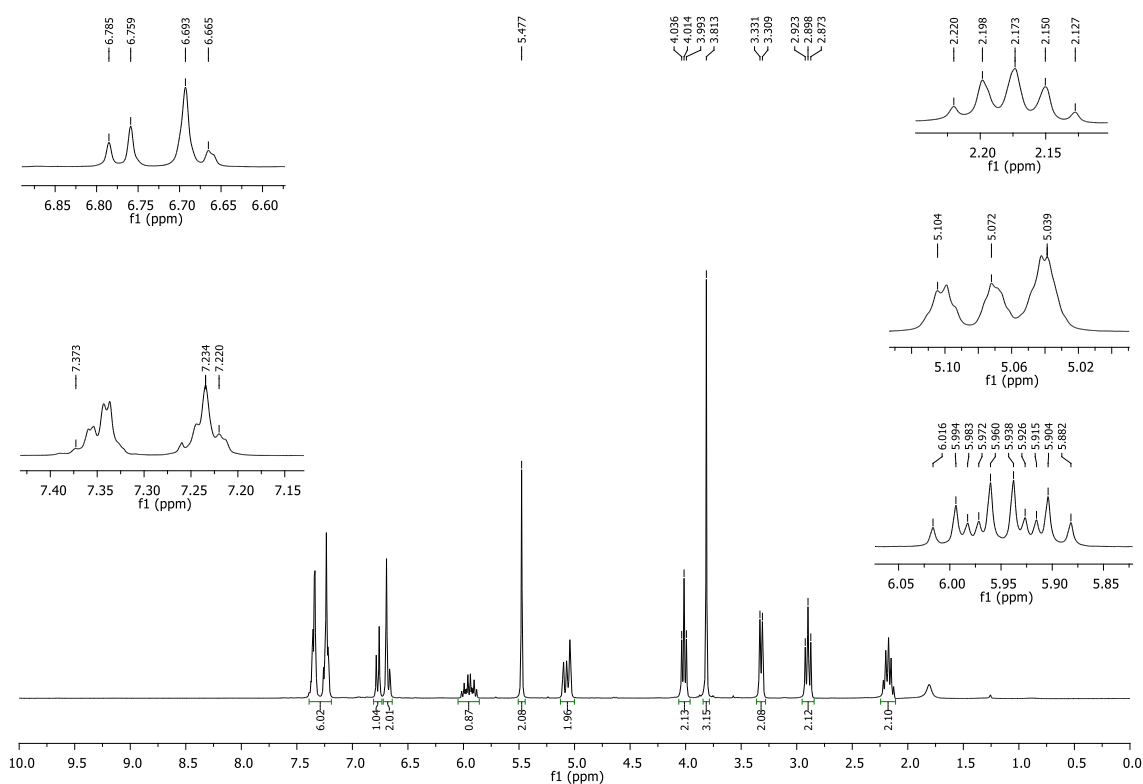

**Fig. AR.**  $^1\text{H}$  NMR spectrum (300 MHz,  $\text{CDCl}_3$ ) of 4-(3-(4-allyl-2-methoxyphenoxy)propyl)-1-benzyl-1*H*-1,2,3-triazole (**37**).

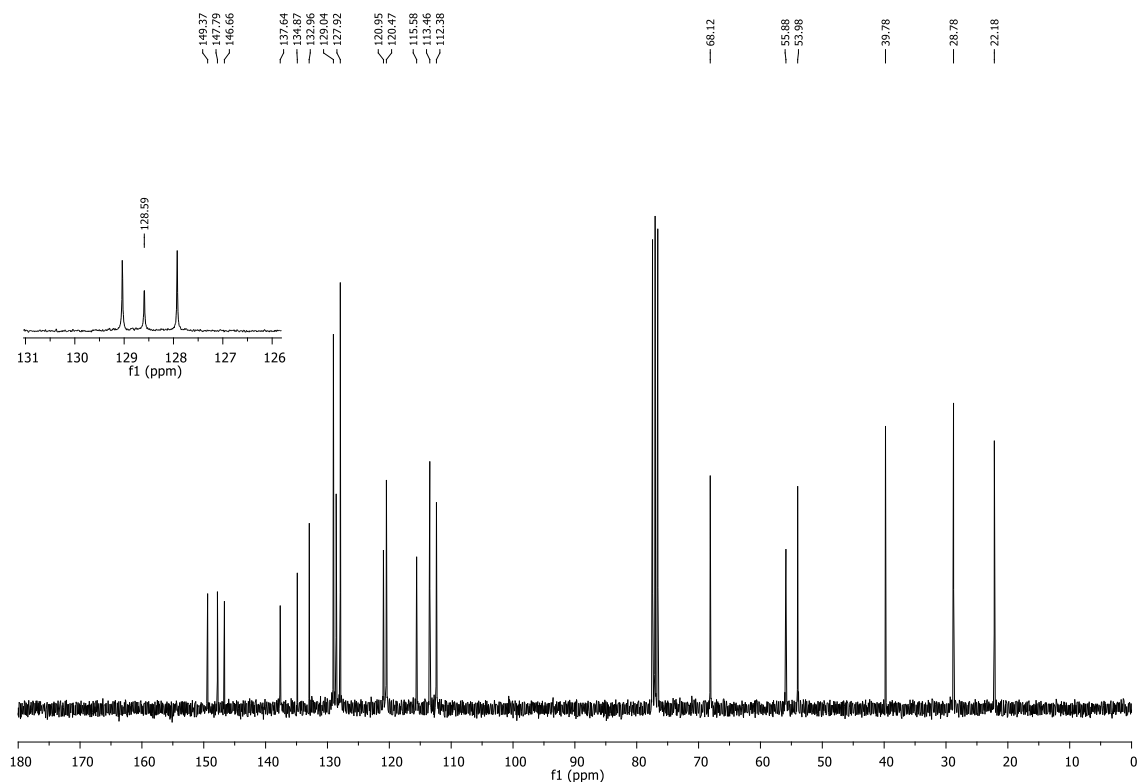

**Fig. AS.**  $^{13}\text{C}$  NMR spectrum (75 MHz,  $\text{CDCl}_3$ ) of 4-(3-(4-allyl-2-methoxyphenoxy)propyl)-1-benzyl-*1H*-1,2,3-triazole (**37**).

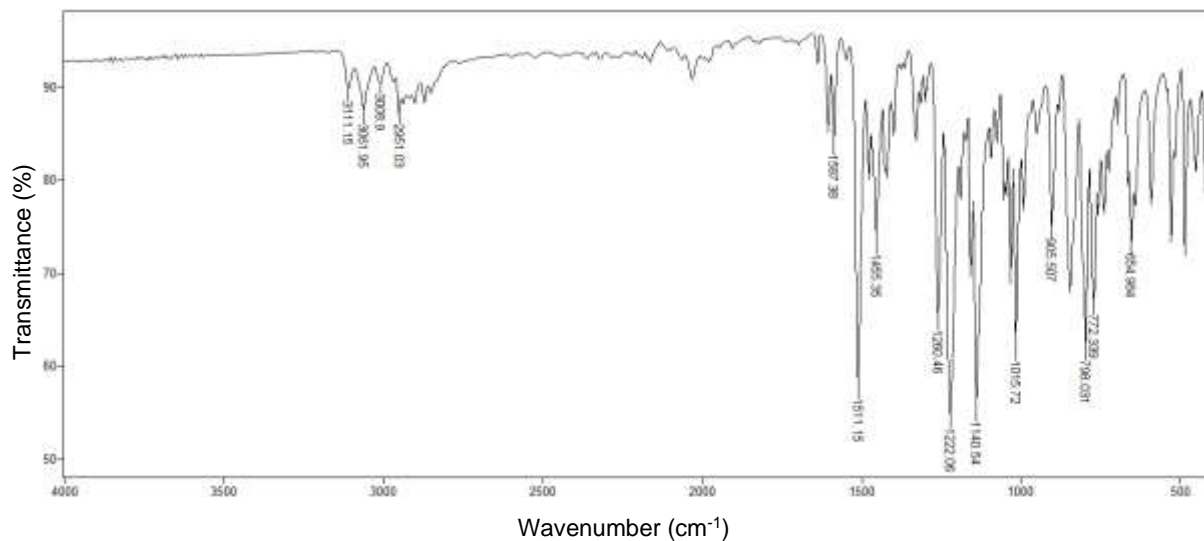

**Fig. AT.** IR spectrum (ATR) of 4-(3-(4-allyl-2-methoxyphenoxy)propyl)-1-(4-fluorobenzyl)-*1H*-1,2,3-triazole (**38**).

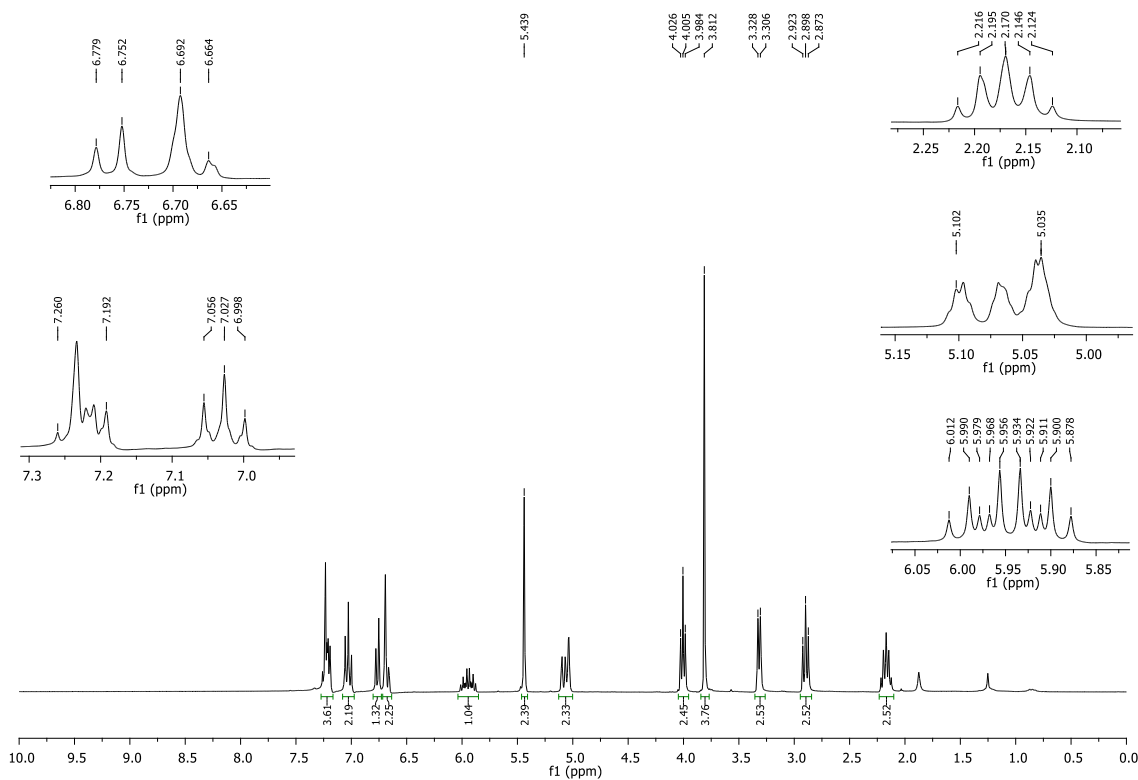

**Fig. AU.**  $^1\text{H}$  NMR spectrum (300 MHz,  $\text{CDCl}_3$ ) of 4-(3-(4-allyl-2-methoxyphenoxy)propyl)-1-(4-fluorobenzyl)-*1H*-1,2,3-triazole (**38**).

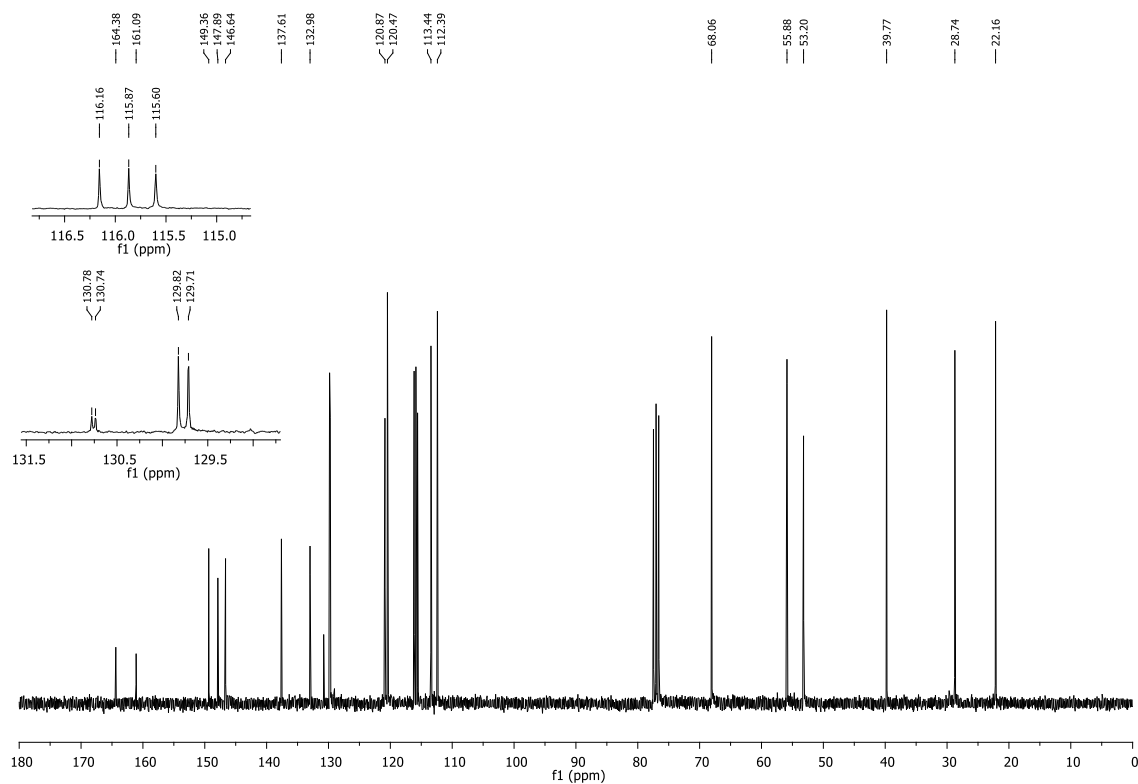

**Fig. AV.**  $^{13}\text{C}$  NMR spectrum (75 MHz,  $\text{CDCl}_3$ ) of 4-(3-(4-allyl-2-methoxyphenoxy)propyl)-1-(4-fluorobenzyl)-*1H*-1,2,3-triazole (**38**).

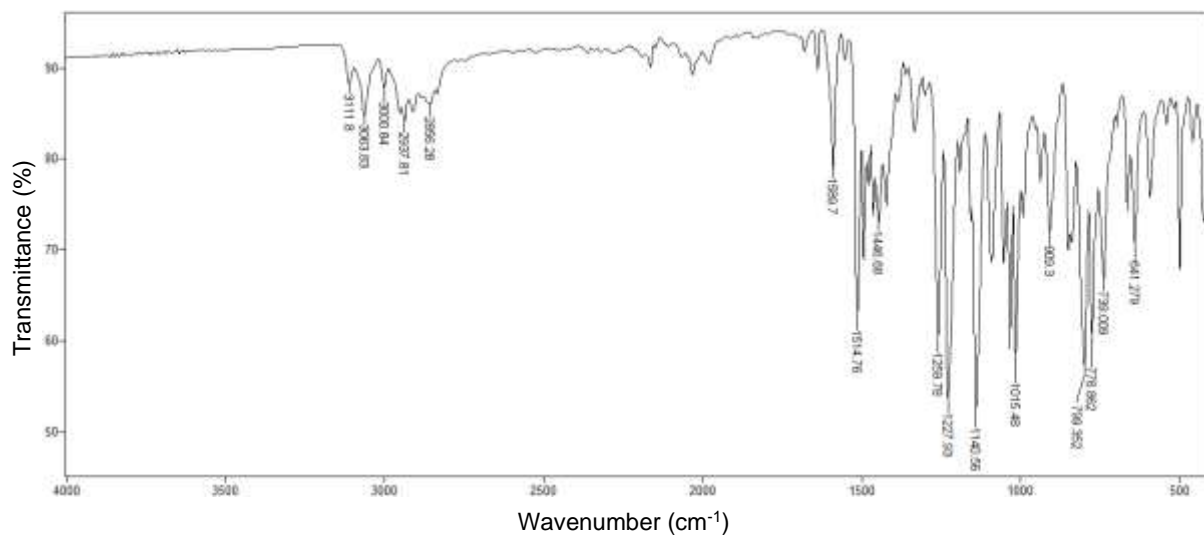

**Fig. AX.** IR spectrum (ATR) of 4-(3-(4-allyl-2-methoxyphenoxy)propyl)-1-(4-chlorobenzyl)-1*H*-1,2,3-triazole (**39**).

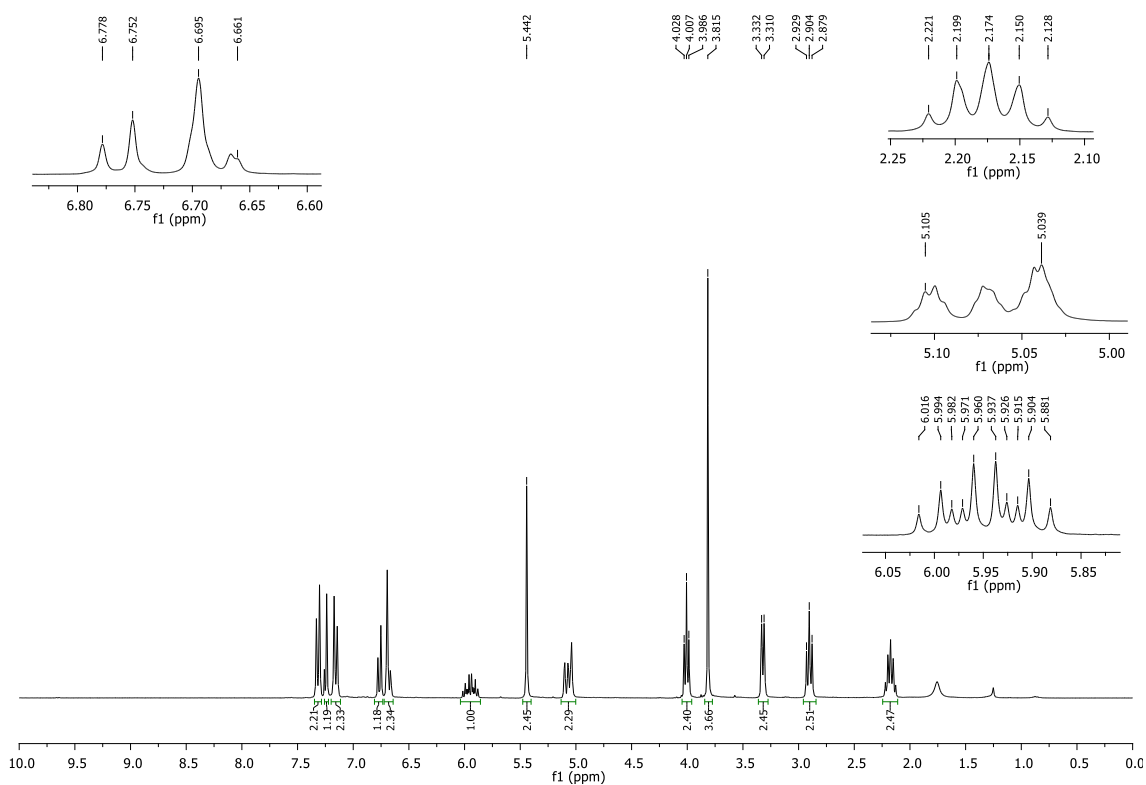

**Fig. AW.**  $^1\text{H}$  NMR spectrum (300 MHz,  $\text{CDCl}_3$ ) of 4-(3-(4-allyl-2-methoxyphenoxy)propyl)-1-(4-chlorobenzyl)-1*H*-1,2,3-triazole (**39**).



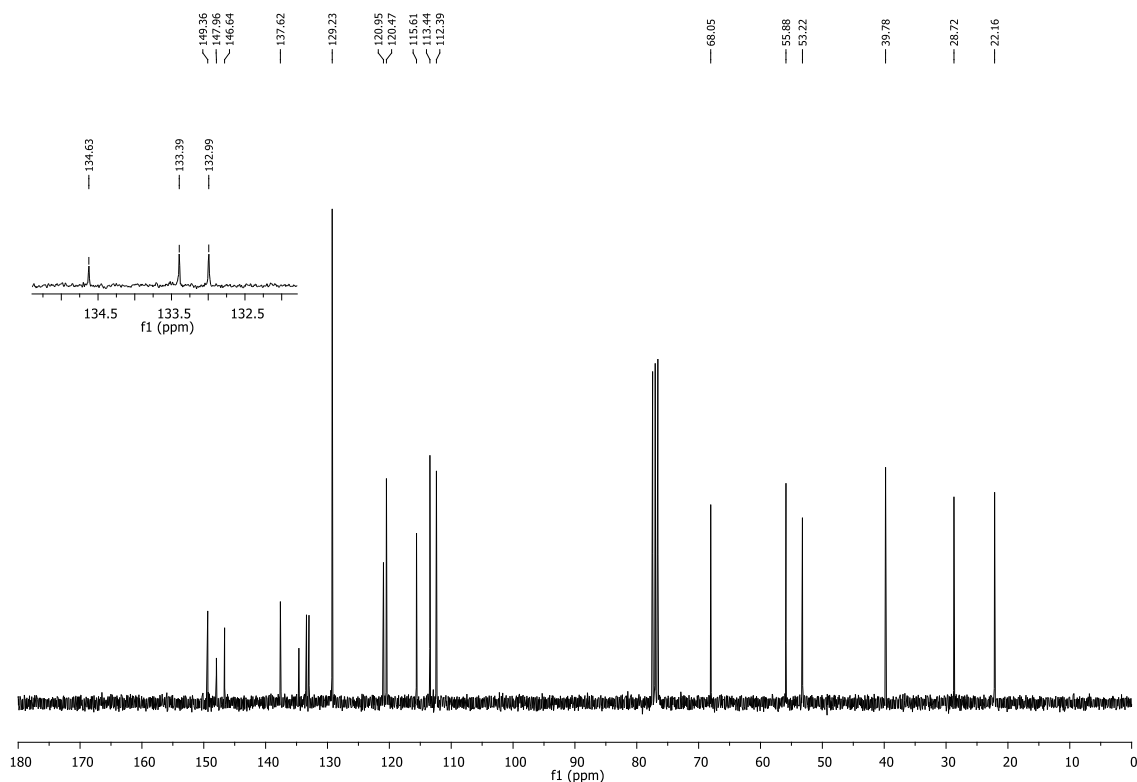

**Fig. AY.**  $^{13}\text{C}$  NMR spectrum (75 MHz,  $\text{CDCl}_3$ ) of 4-(3-(4-allyl-2-methoxyphenoxy)propyl)-1-(4-chlorobenzyl)-*1H*-1,2,3-triazole (**39**).

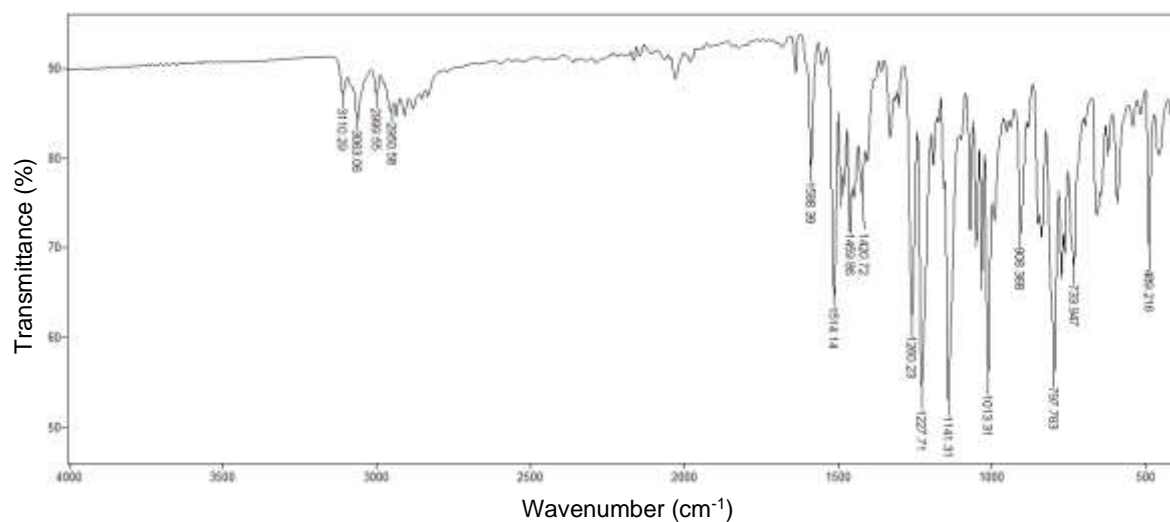

**Fig. AZ.** IR spectrum (ATR) of 4-(3-(4-allyl-2-methoxyphenoxy)propyl)-1-(4-bromobenzyl)-*1H*-1,2,3-triazole (**40**).

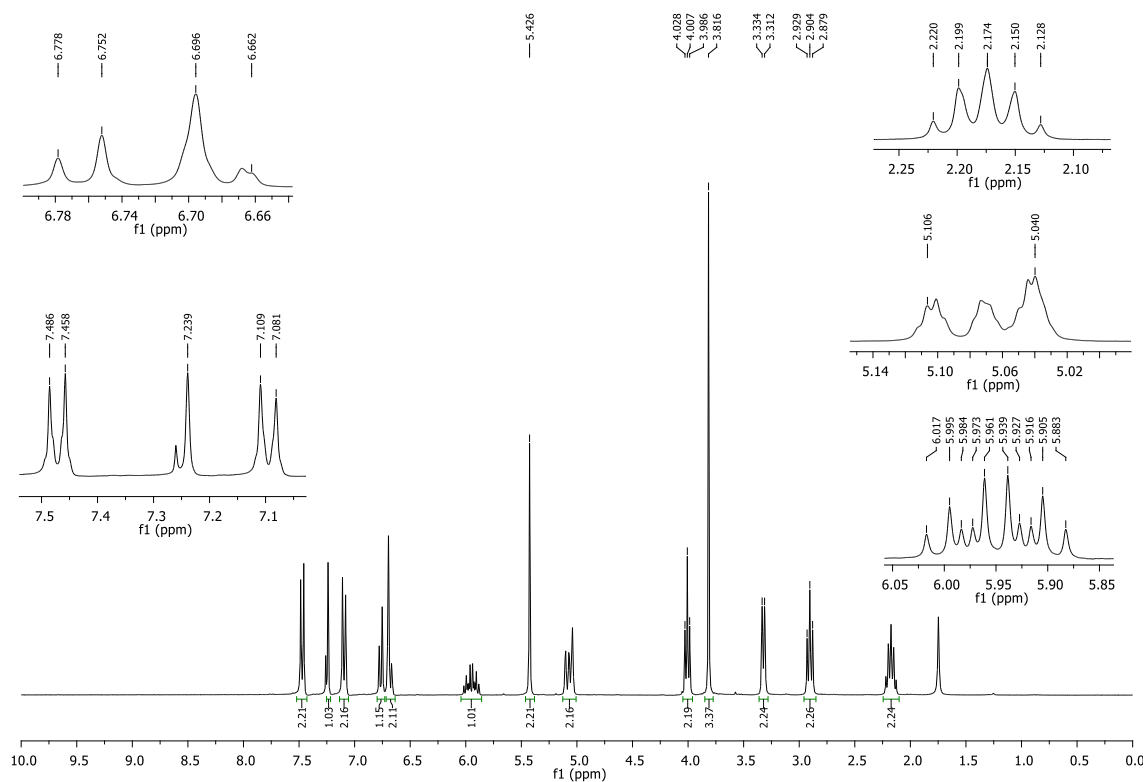

**Fig. BA.**  $^1\text{H}$  NMR spectrum (300 MHz,  $\text{CDCl}_3$ ) of 4-(3-(4-allyl-2-methoxyphenoxy)propyl)-1-(4-bromobenzyl)-*1H*-1,2,3-triazole (**40**).

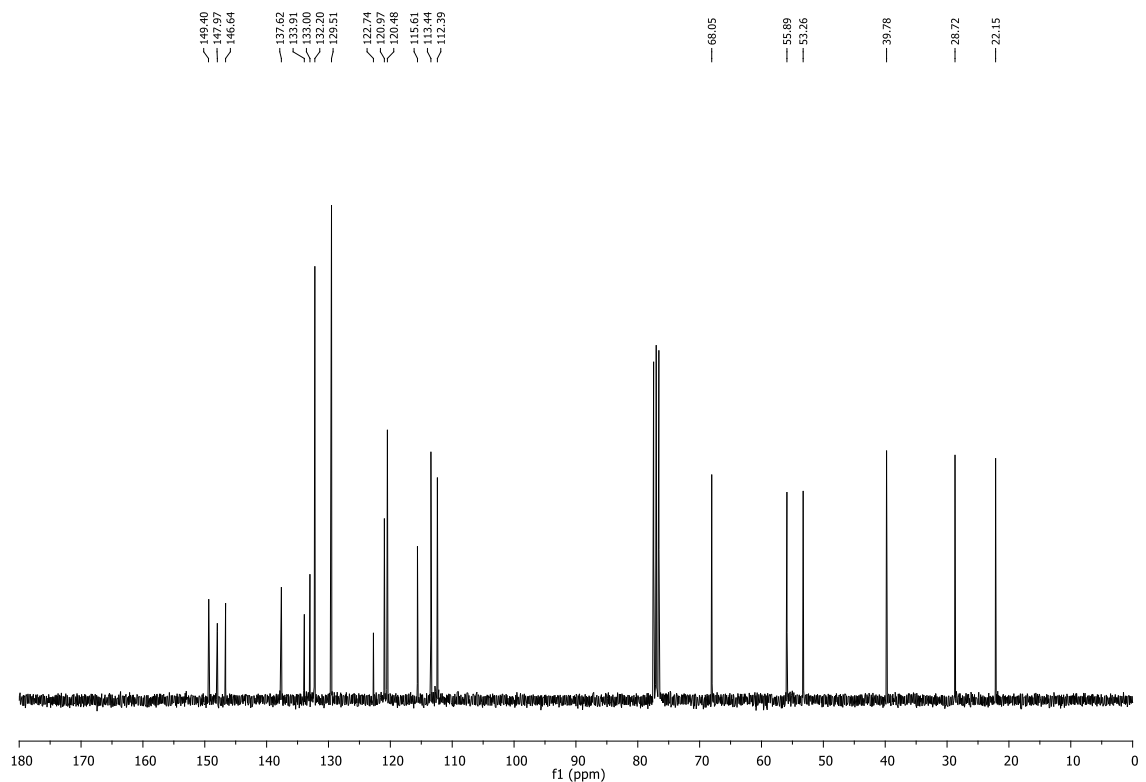

**Fig. BB.**  $^{13}\text{C}$  NMR spectrum (75 MHz,  $\text{CDCl}_3$ ) of 4-(3-(4-allyl-2-methoxyphenoxy)propyl)-1-(4-bromobenzyl)-*1H*-1,2,3-triazole (**40**).

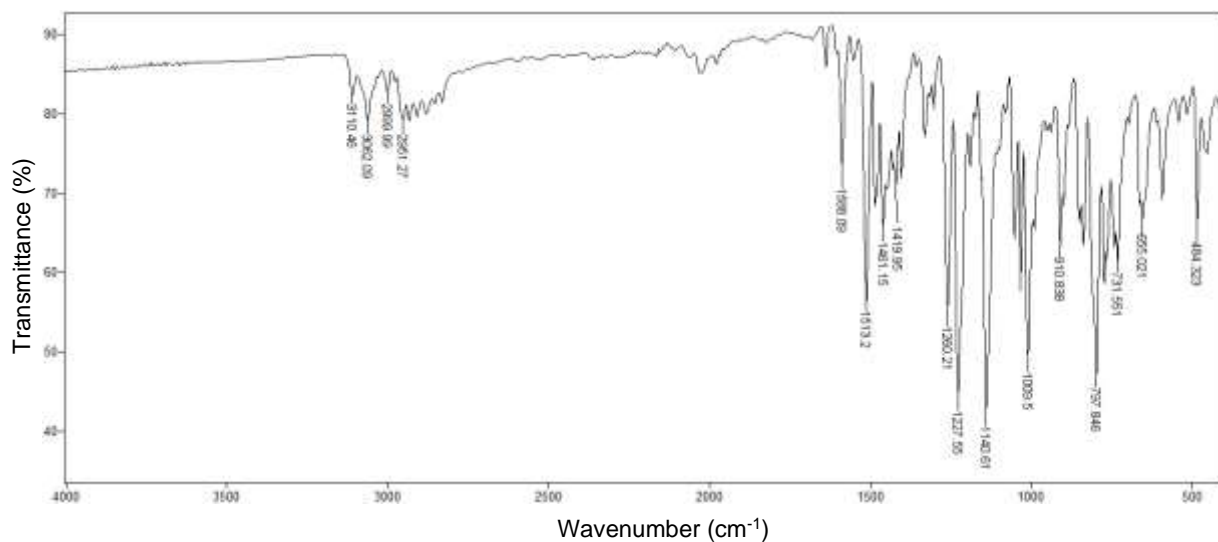

**Fig. BC.** IR spectrum (ATR) of 4-(3-(4-allyl-2-methoxyphenoxy)propyl)-1-(4-iodobenzyl)-1H-1,2,3-triazole (**41**).

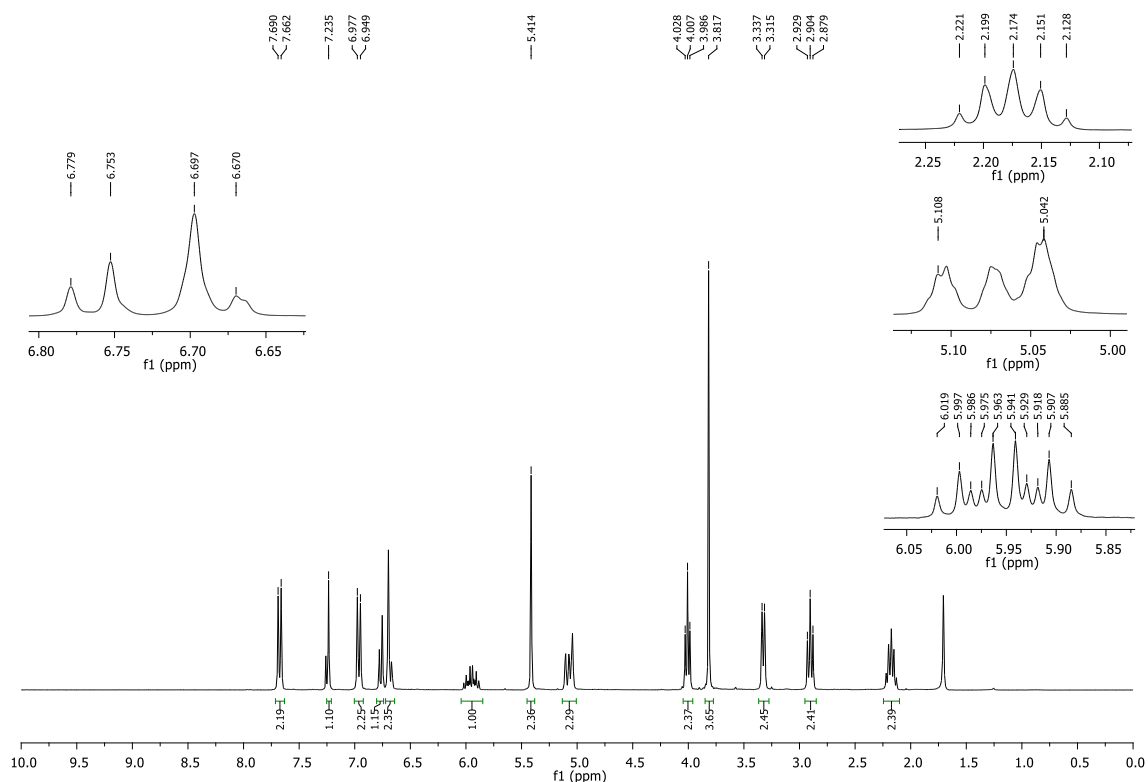

**Fig. BD.**  $^1\text{H}$  NMR spectrum (300 MHz,  $\text{CDCl}_3$ ) of 4-(3-(4-allyl-2-methoxyphenoxy)propyl)-1-(4-iodobenzyl)-1H-1,2,3-triazole (**41**).

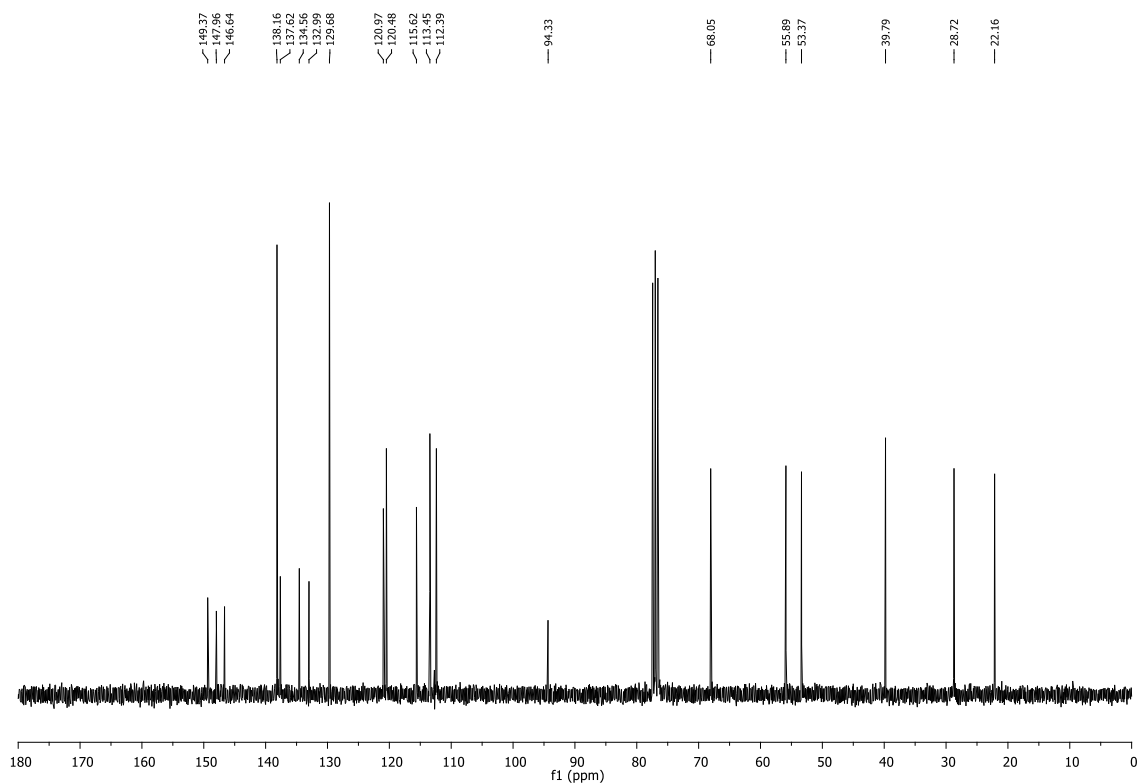

**Fig. BE.**  $^{13}\text{C}$  NMR spectrum (75 MHz,  $\text{CDCl}_3$ ) of 4-(3-(4-allyl-2-methoxyphenoxy)propyl)-1-(4-iodobenzyl)-*1H*-1,2,3-triazole (**41**).

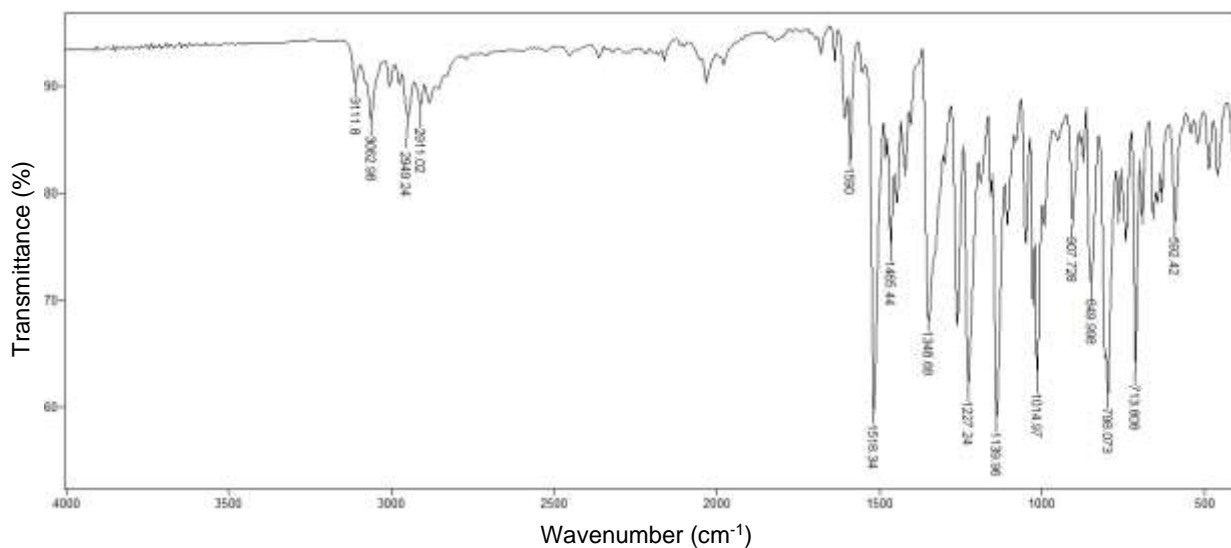

**Fig. BF.** IR spectrum (ATR) of 4-(3-(4-allyl-2-methoxyphenoxy)propyl)-1-(4-nitrobenzyl)-*1H*-1,2,3-triazole (**42**).

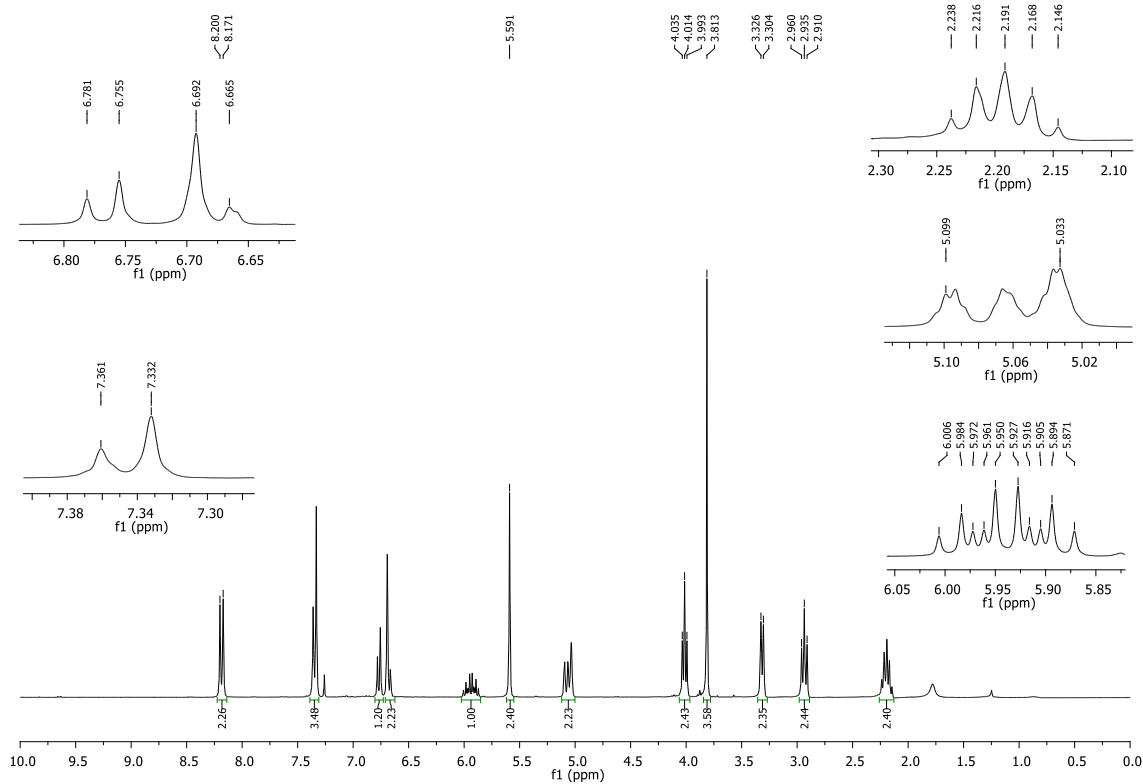

**Fig. BG.**  $^1\text{H}$  NMR spectrum (300 MHz,  $\text{CDCl}_3$ ) of 4-(3-(4-allyl-2-methoxyphenoxy)propyl)-1-(4-nitrobenzyl)-*1H*-1,2,3-triazole (**42**).

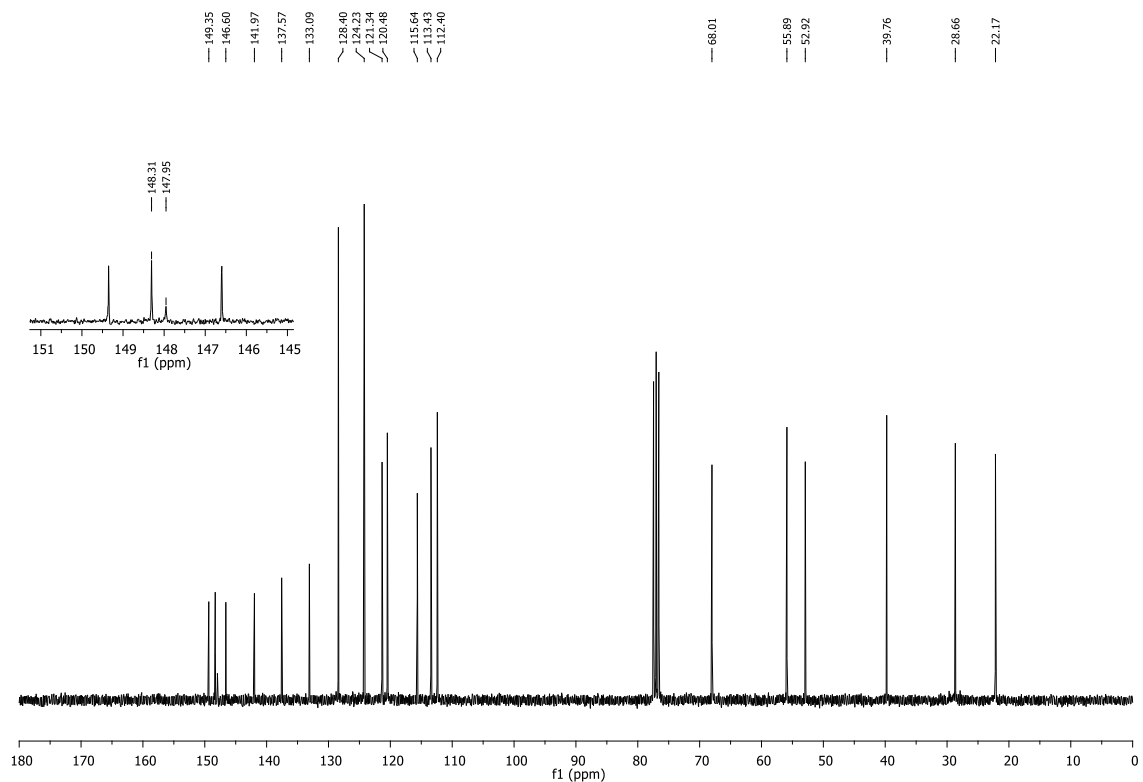

**Fig. BH.**  $^{13}\text{C}$  NMR spectrum (75 MHz,  $\text{CDCl}_3$ ) of 4-(3-(4-allyl-2-methoxyphenoxy)propyl)-1-(4-nitrobenzyl)-*1H*-1,2,3-triazole (**42**).

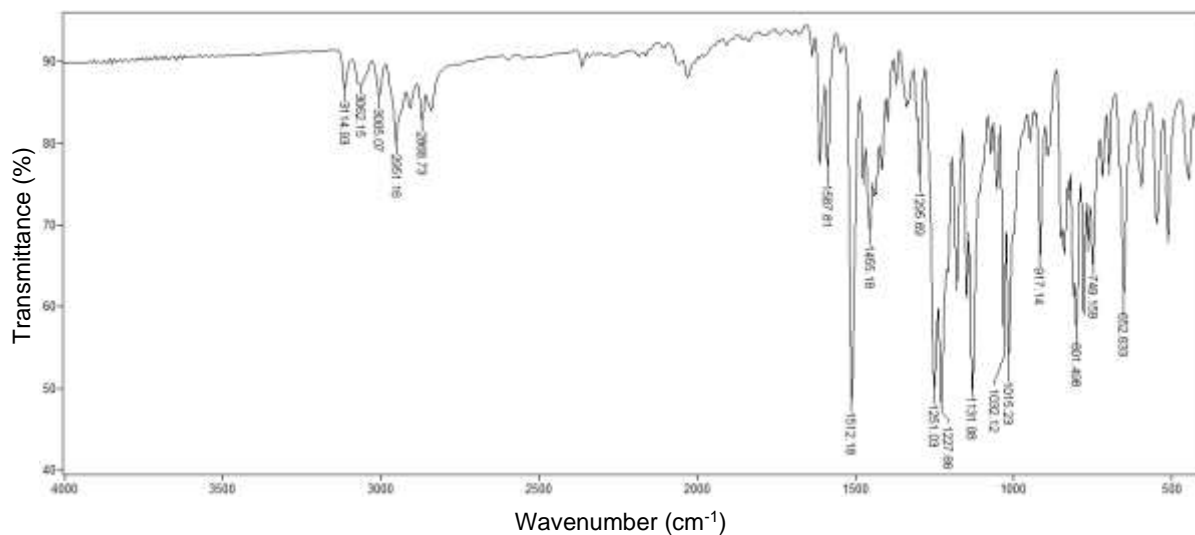

**Fig. BI.** IR spectrum (ATR) of 4-(3-(4-allyl-2-methoxyphenoxy)propyl)-1-(4-methoxybenzyl)-1*H*-1,2,3-triazole (**43**).

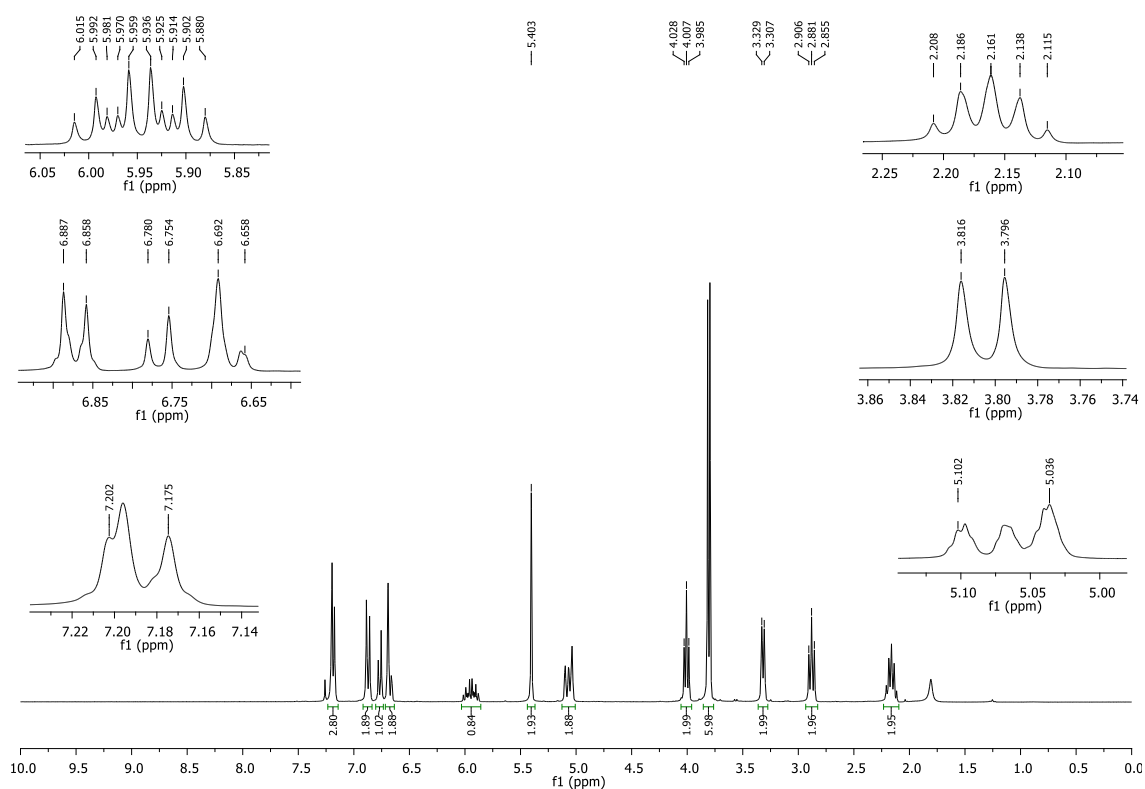

**Fig. BJ.**  $^1\text{H}$  NMR spectrum (300 MHz,  $\text{CDCl}_3$ ) of 4-(3-(4-allyl-2-methoxyphenoxy)propyl)-1-(4-methoxybenzyl)-1*H*-1,2,3-triazole (**43**).

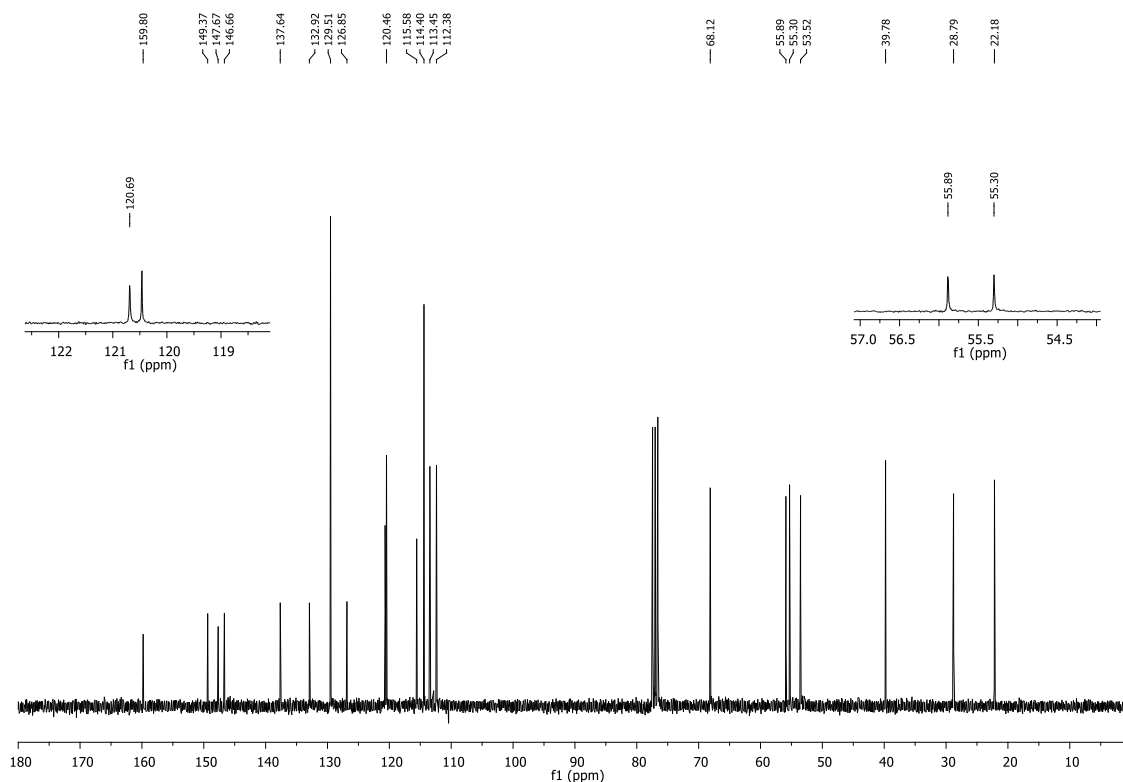

**Fig. BK.**  $^{13}\text{C}$  NMR spectrum (75 MHz,  $\text{CDCl}_3$ ) of 4-(3-(4-allyl-2-methoxyphenoxy)propyl)-1-(4-methoxybenzyl)-*1H*-1,2,3-triazole (**43**).

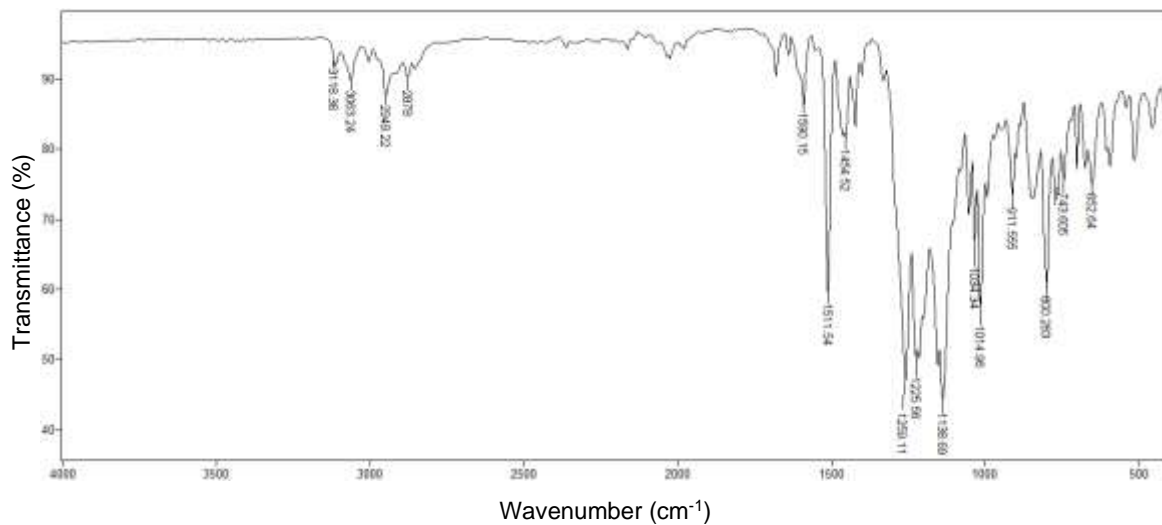

**Fig. BL.** IR spectrum (ATR) of 4-(3-(4-allyl-2-methoxyphenoxy)propyl)-1-(4-(trifluoromethoxy)benzyl)-*1H*-1,2,3-triazole (**44**).

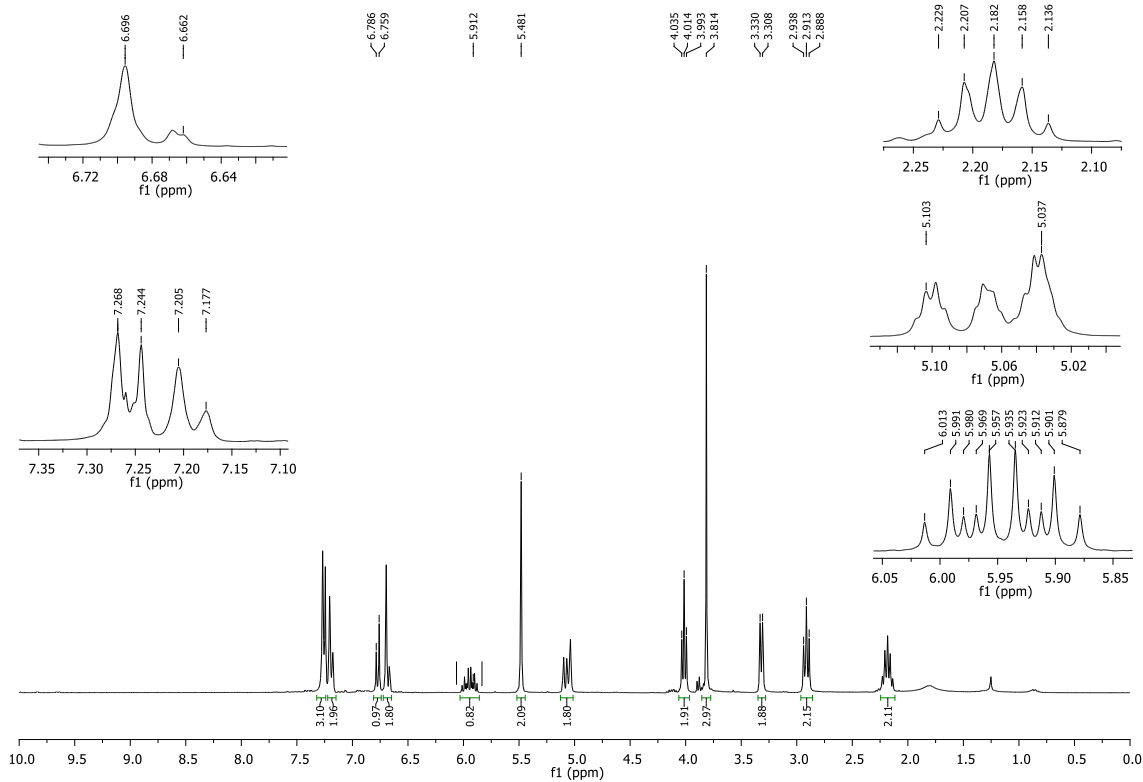

**Fig. BM.**  $^1\text{H}$  NMR spectrum (300 MHz,  $\text{CDCl}_3$ ) of 4-(3-(4-allyl-2-methoxyphenoxy)propyl)-1-(4-(trifluoromethoxy)benzyl)-*1H*-1,2,3-triazole (**44**).

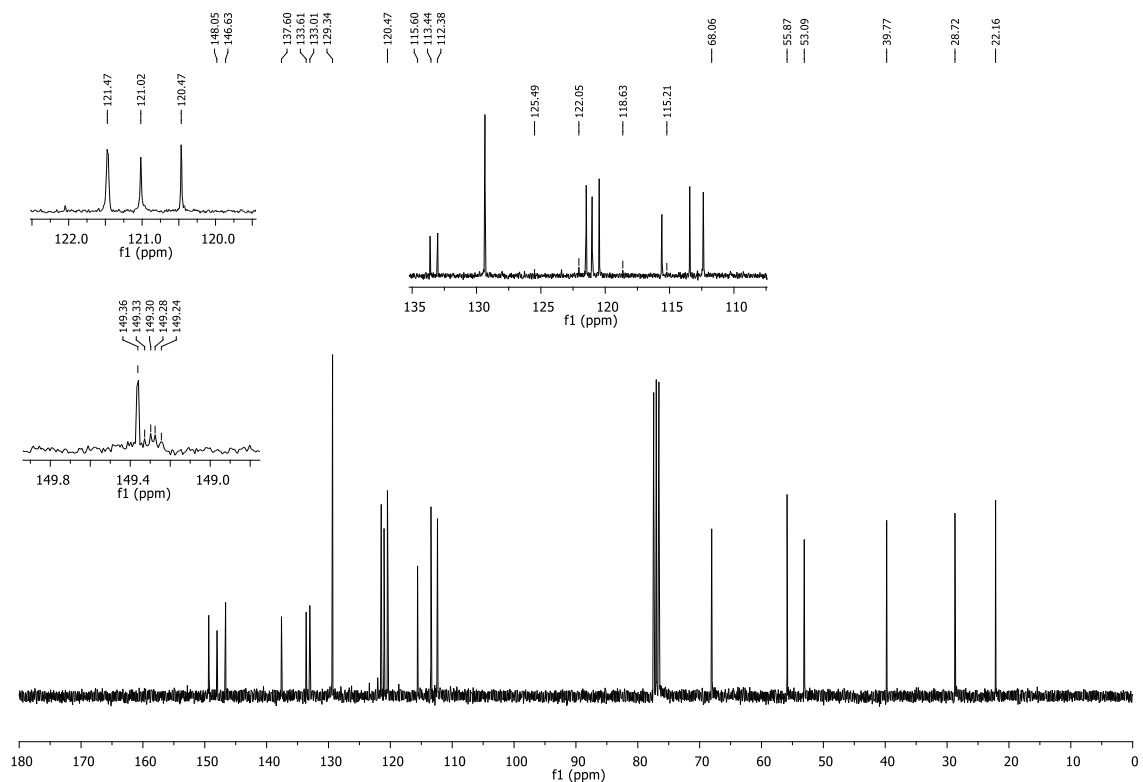

**Fig. BN.**  $^{13}\text{C}$  NMR spectrum (75 MHz,  $\text{CDCl}_3$ ) of 4-(3-(4-allyl-2-methoxyphenoxy)propyl)-1-(4-(trifluoromethoxy)benzyl)-*1H*-1,2,3-triazole (**44**).



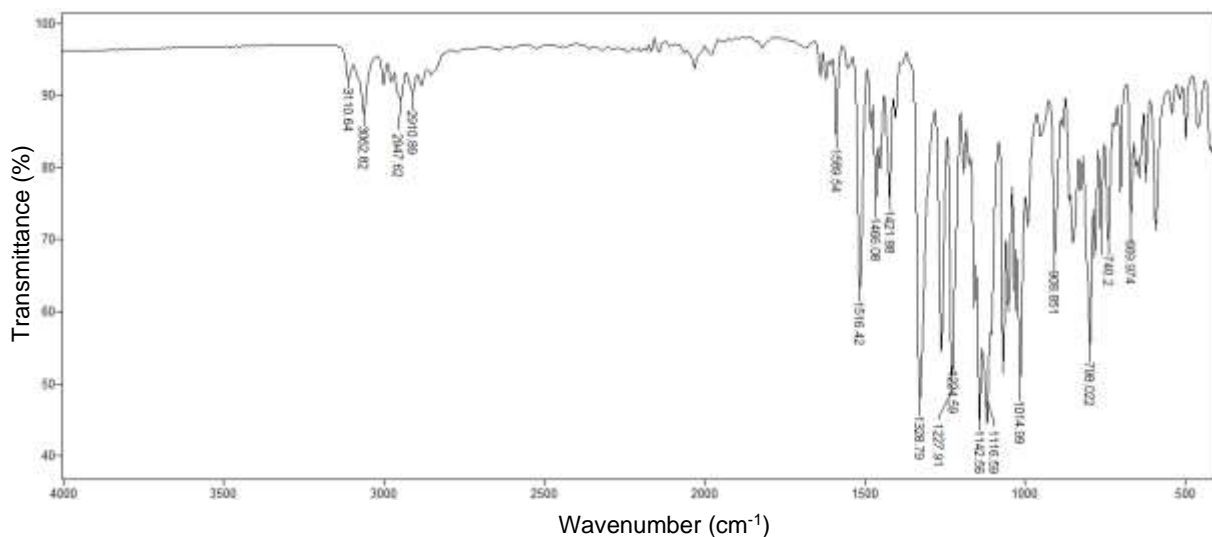

**Fig. BO.** IR spectrum (ATR) of 4-(3-(4-allyl-2-methoxyphenoxy)propyl)-1-(4-(trifluoromethyl)benzyl)-1H-1,2,3-triazole (**45**).

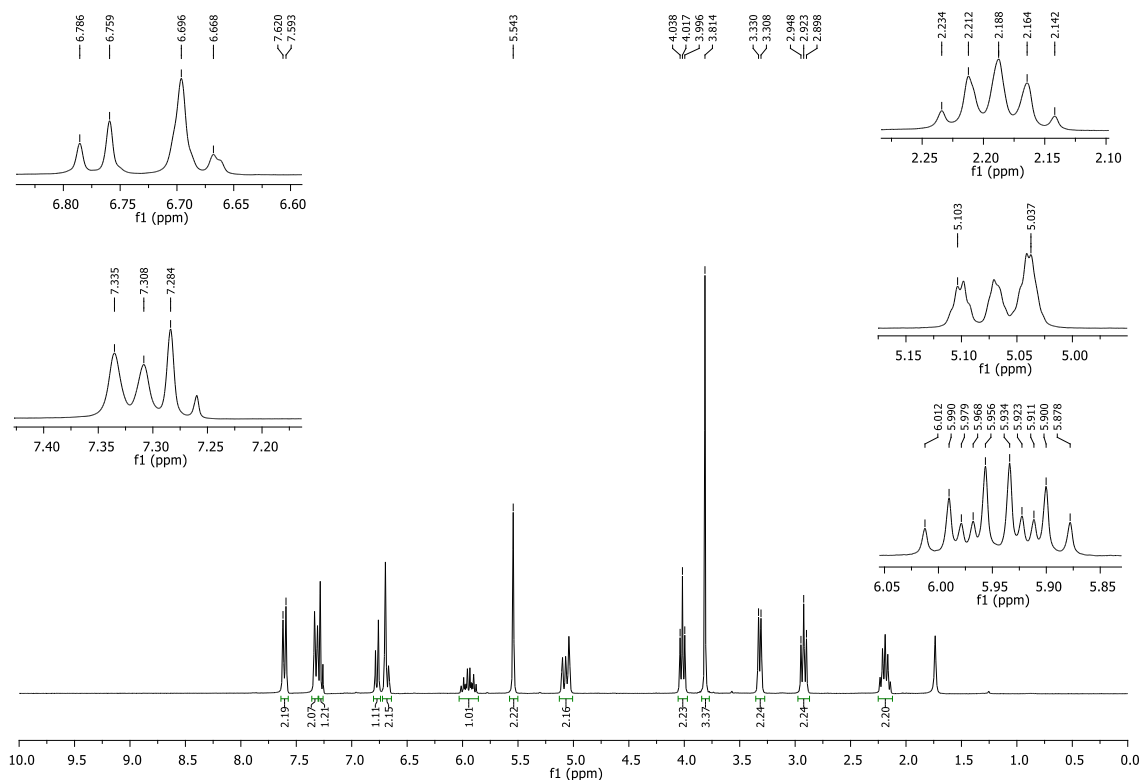

**Fig. BP.**  $^1\text{H}$  NMR spectrum (300 MHz,  $\text{CDCl}_3$ ) of 4-(3-(4-allyl-2-methoxyphenoxy)propyl)-1-(4-(trifluoromethyl)benzyl)-1H-1,2,3-triazole (**45**).

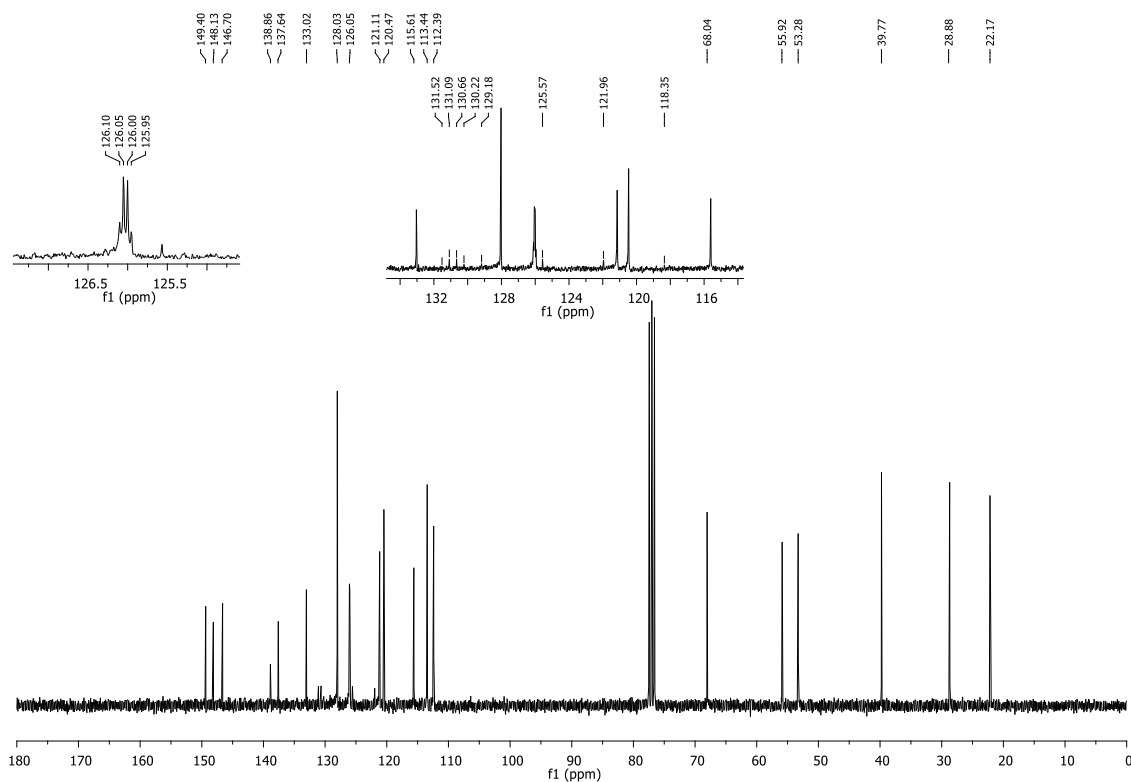

**Fig. BQ.**  $^{13}\text{C}$  NMR spectrum (75 MHz,  $\text{CDCl}_3$ ) of 4-(3-(4-allyl-2-methoxyphenoxy)propyl)-1-(4-(trifluoromethyl)benzyl)-1*H*-1,2,3-triazole (**45**).

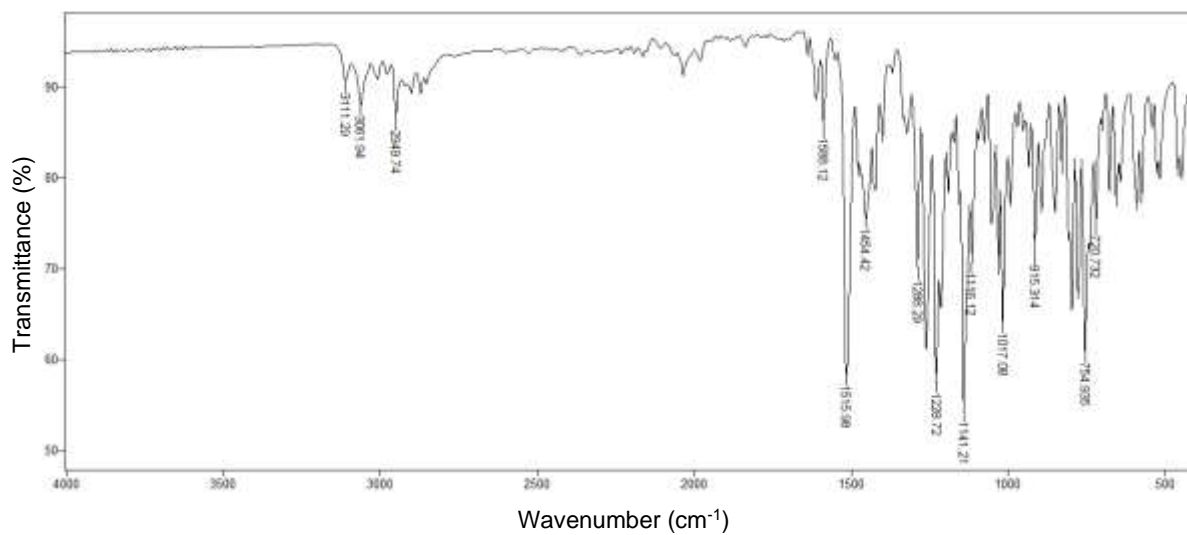

**Fig. BR.** IR spectrum (ATR) of 4-(3-(4-allyl-2-methoxyphenoxy)propyl)-1-(3,4-difluorobenzyl)-1*H*-1,2,3-triazole (**46**).

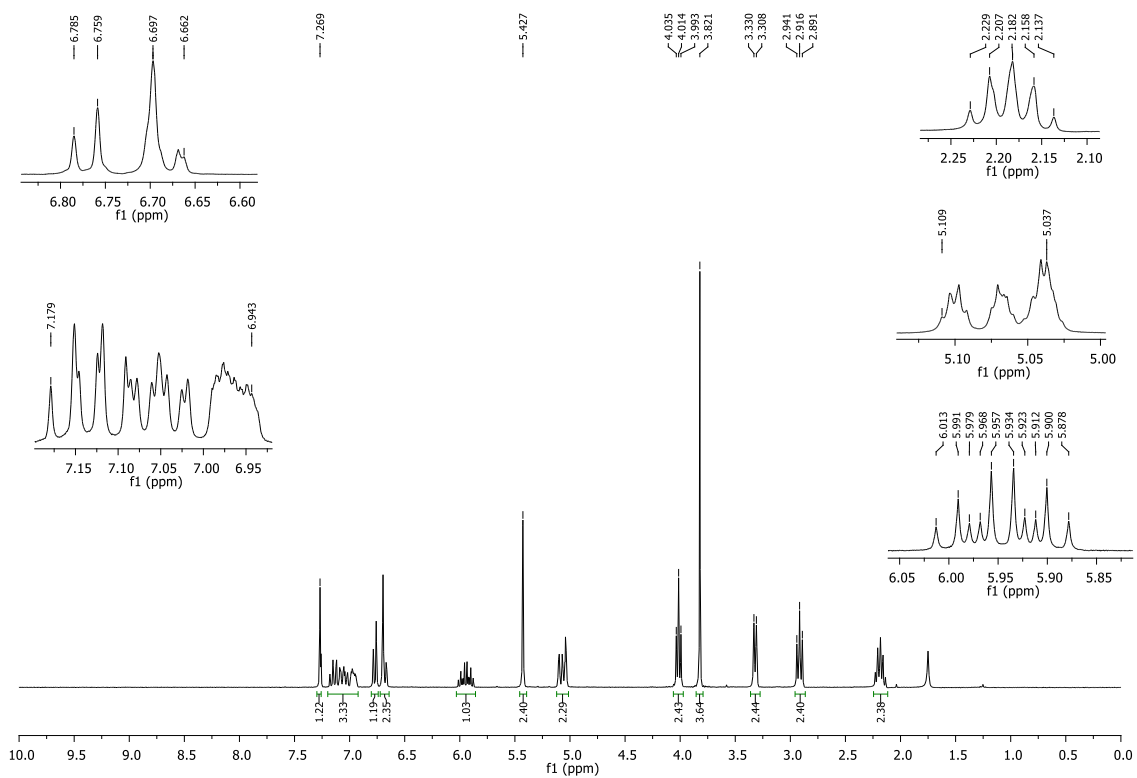

**Fig. BS.**  $^1\text{H}$  NMR spectrum (300 MHz,  $\text{CDCl}_3$ ) of 4-(3-(4-allyl-2-methoxyphenoxy)propyl)-1-(3,4-difluorobenzyl)-1*H*-1,2,3-triazole (**46**).

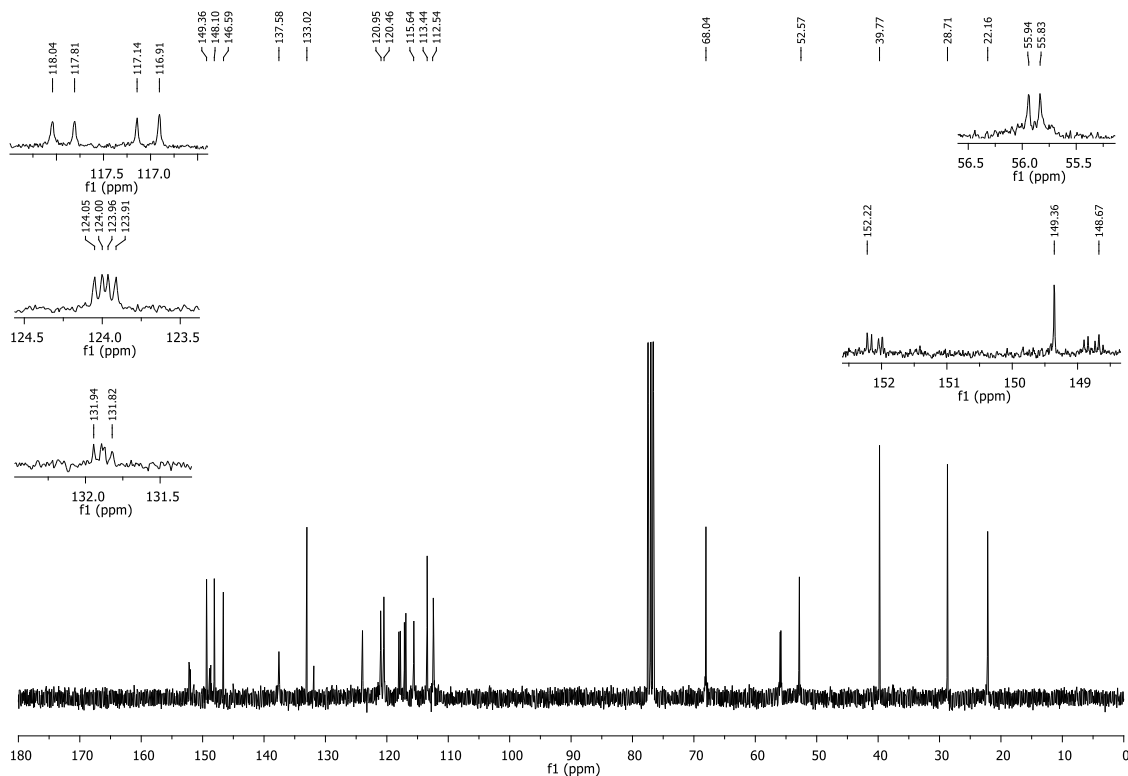

**Fig. BT.**  $^{13}\text{C}$  NMR spectrum (75 MHz,  $\text{CDCl}_3$ ) of 4-(3-(4-allyl-2-methoxyphenoxy)propyl)-1-(3,4-difluorobenzyl)-1*H*-1,2,3-triazole (**46**).

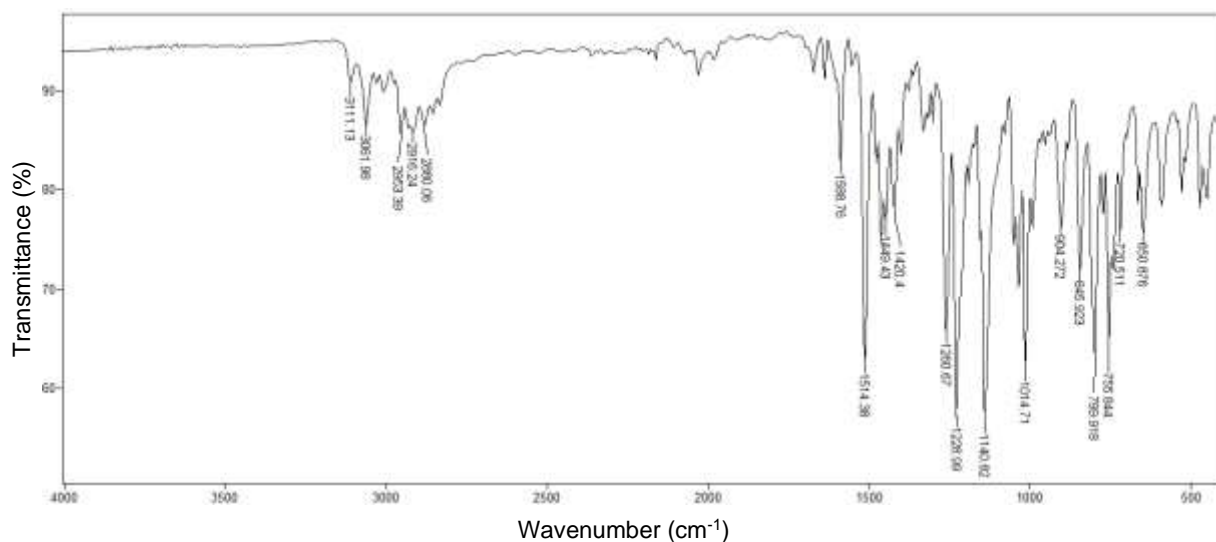

**Fig. BU.** IR spectrum (ATR) of 4-(3-(4-allyl-2-methoxyphenoxy)propyl)-1-(4-methylbenzyl)-1H-1,2,3-triazole (**47**).

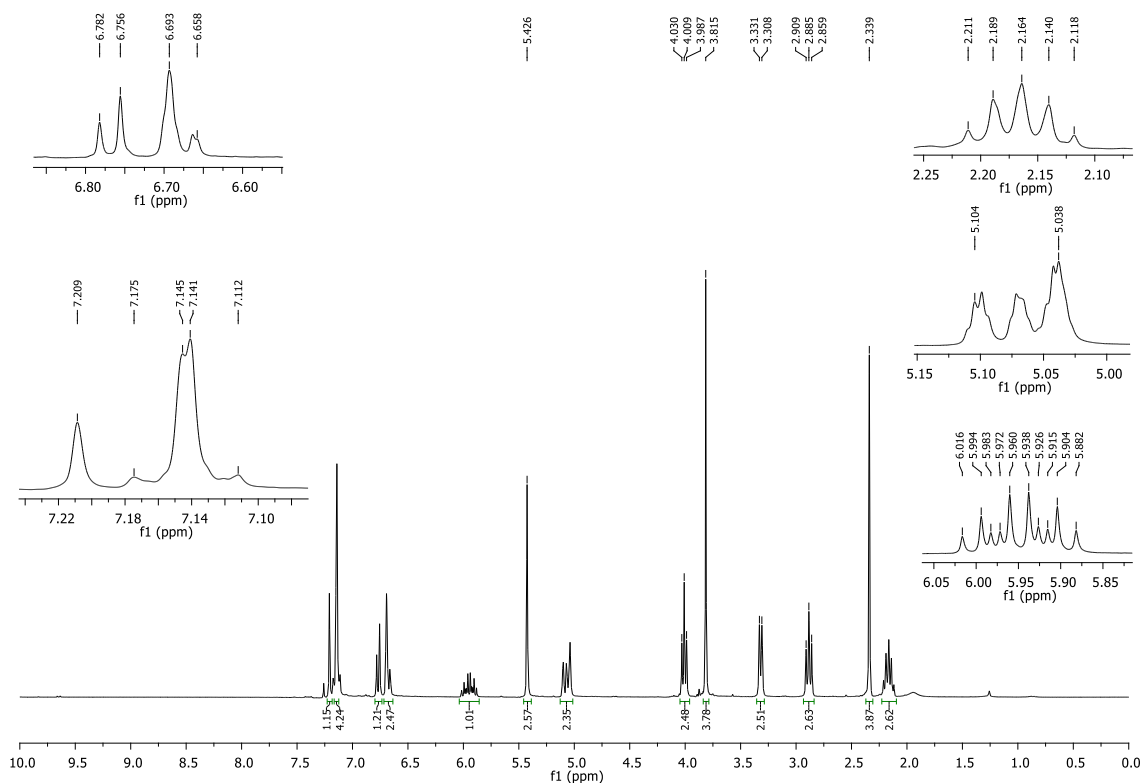

**Fig. BV.**  $^1\text{H}$  NMR spectrum (300 MHz,  $\text{CDCl}_3$ ) of 4-(3-(4-allyl-2-methoxyphenoxy)propyl)-1-(4-methylbenzyl)-1H-1,2,3-triazole (**47**).

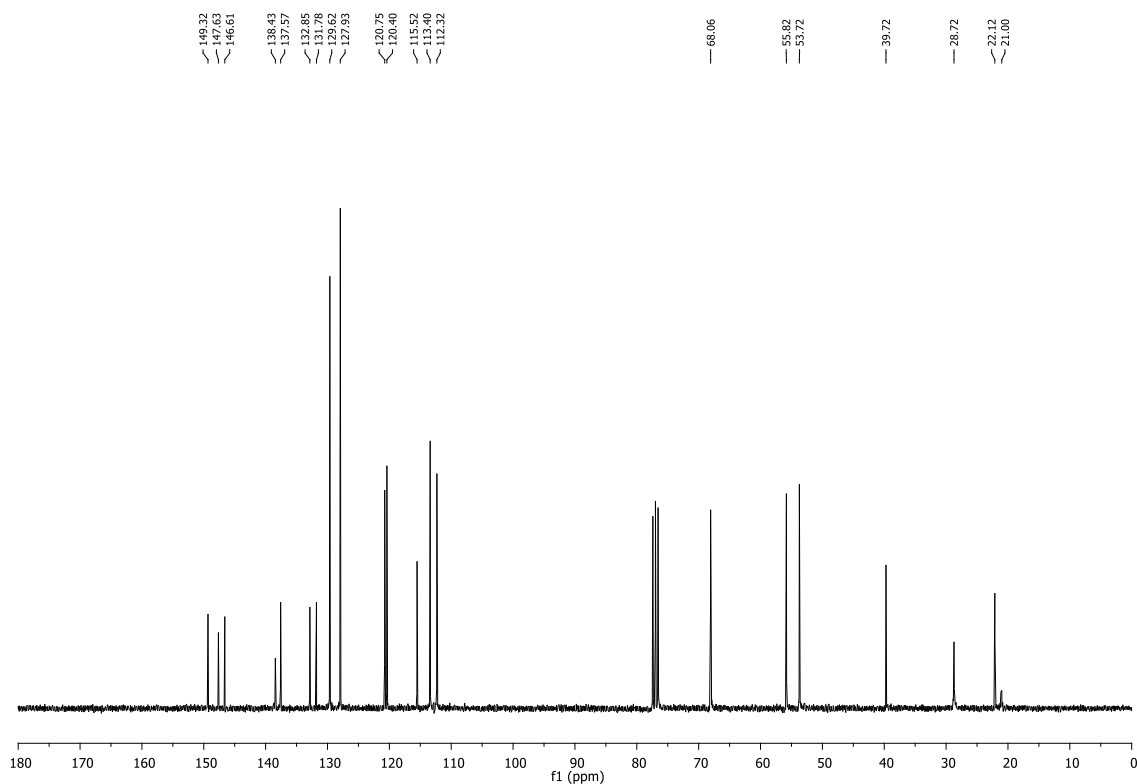

**Fig. BX.**  $^{13}\text{C}$  NMR spectrum (75 MHz,  $\text{CDCl}_3$ ) of 4-(3-(4-allyl-2-methoxyphenoxy)propyl)-1-(4-methylbenzyl)-1*H*-1,2,3-triazole (**47**).

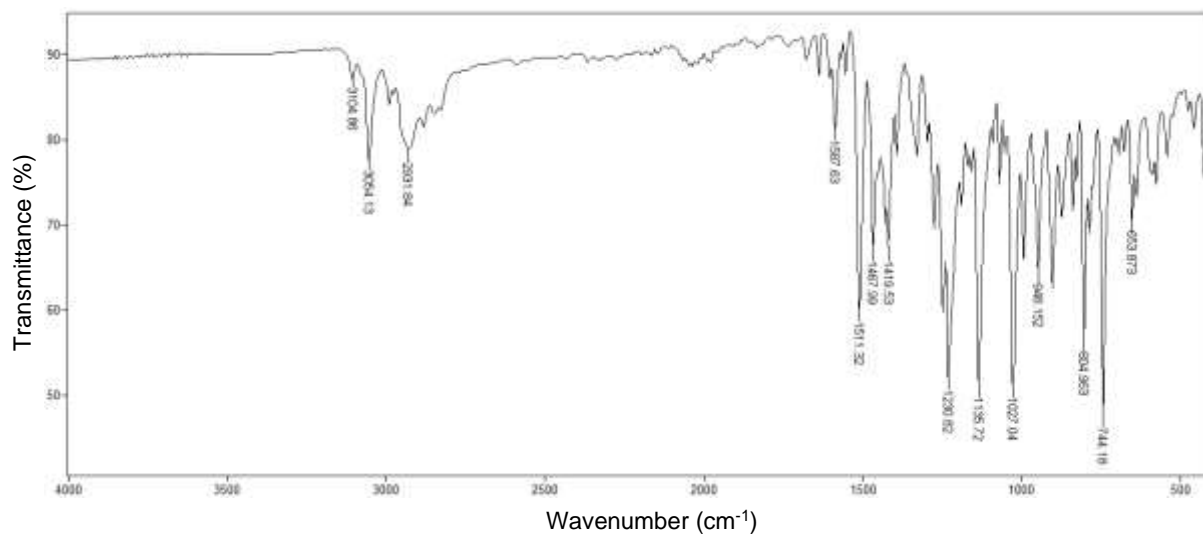

**Fig. BW.** IR spectrum (ATR) of 4-(3-(4-allyl-2-methoxyphenoxy)propyl)-1-(2-bromobenzyl)-1*H*-1,2,3-triazole (**48**).

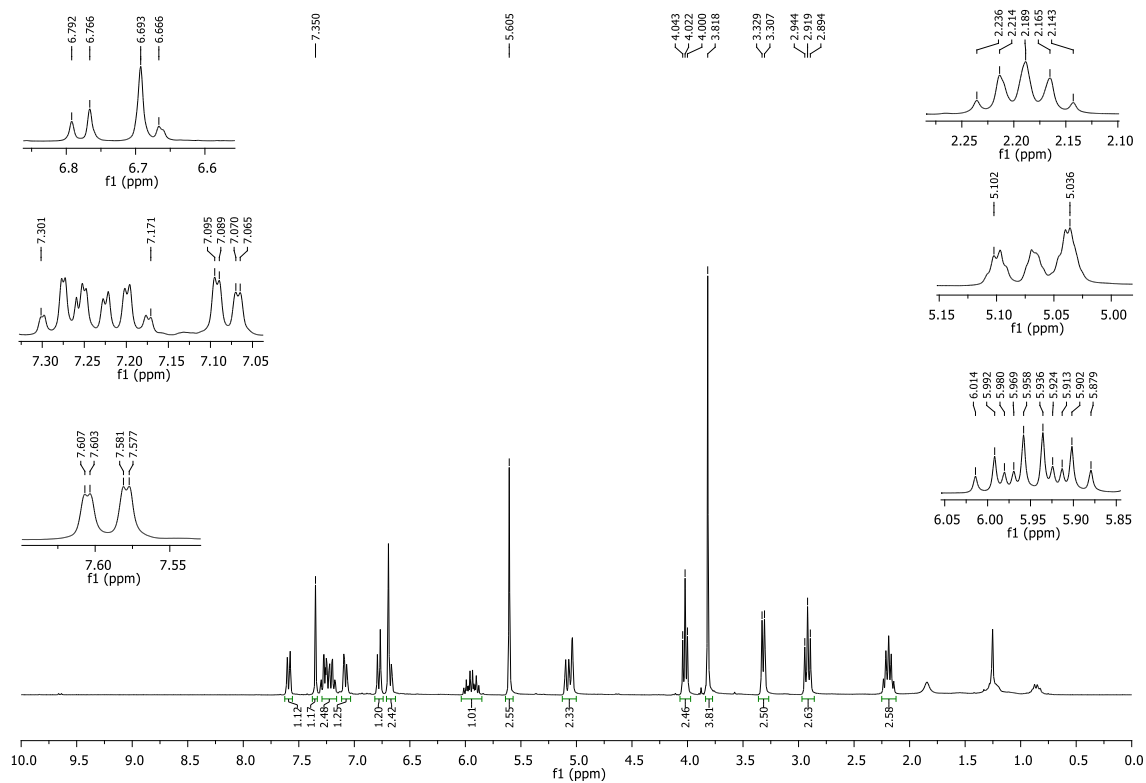

**Fig. BY.**  $^1\text{H}$  NMR spectrum (300 MHz,  $\text{CDCl}_3$ ) of 4-(3-(4-allyl-2-methoxyphenoxy)propyl)-1-(2-bromobenzyl)-*1H*-1,2,3-triazole (**48**).

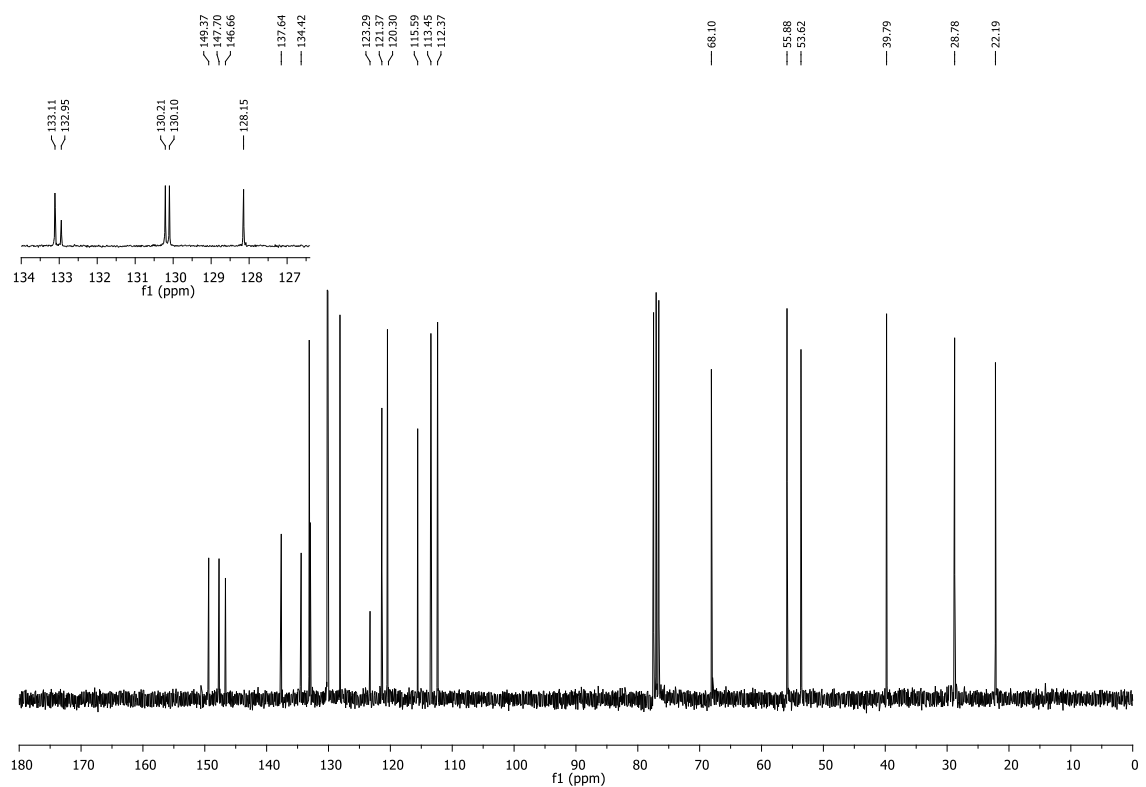

**Fig. BZ.**  $^{13}\text{C}$  NMR spectrum (75 MHz,  $\text{CDCl}_3$ ) of 4-(3-(4-allyl-2-methoxyphenoxy)propyl)-1-(2-bromobenzyl)-*1H*-1,2,3-triazole (**48**).

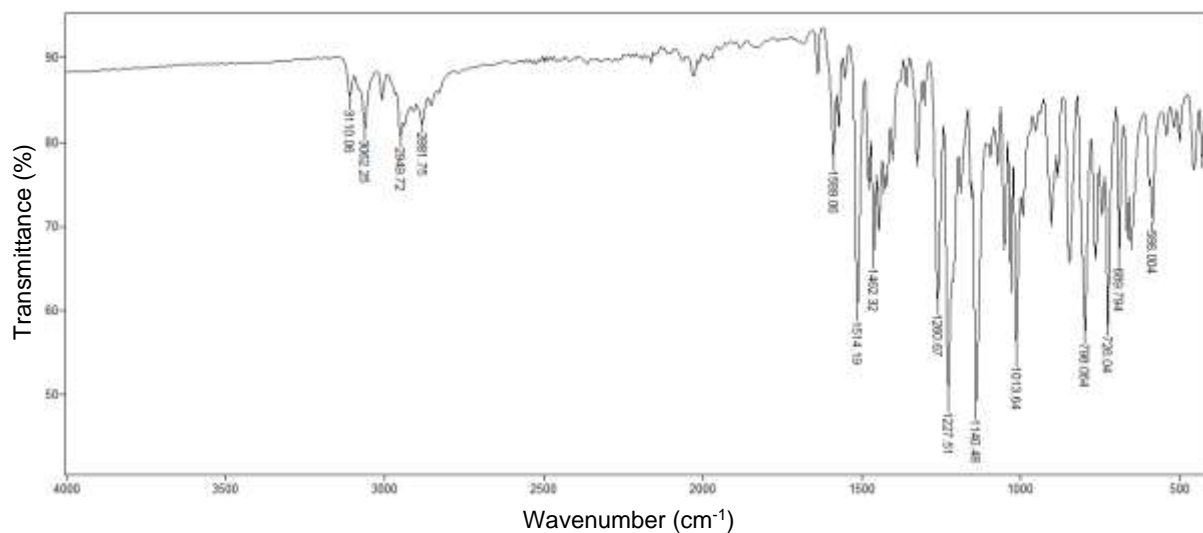

**Fig. CA.** IR spectrum (ATR) of 4-(3-(4-allyl-2-methoxyphenoxy)propyl)-1-(3-bromobenzyl)-1*H*-1,2,3-triazole (**49**).

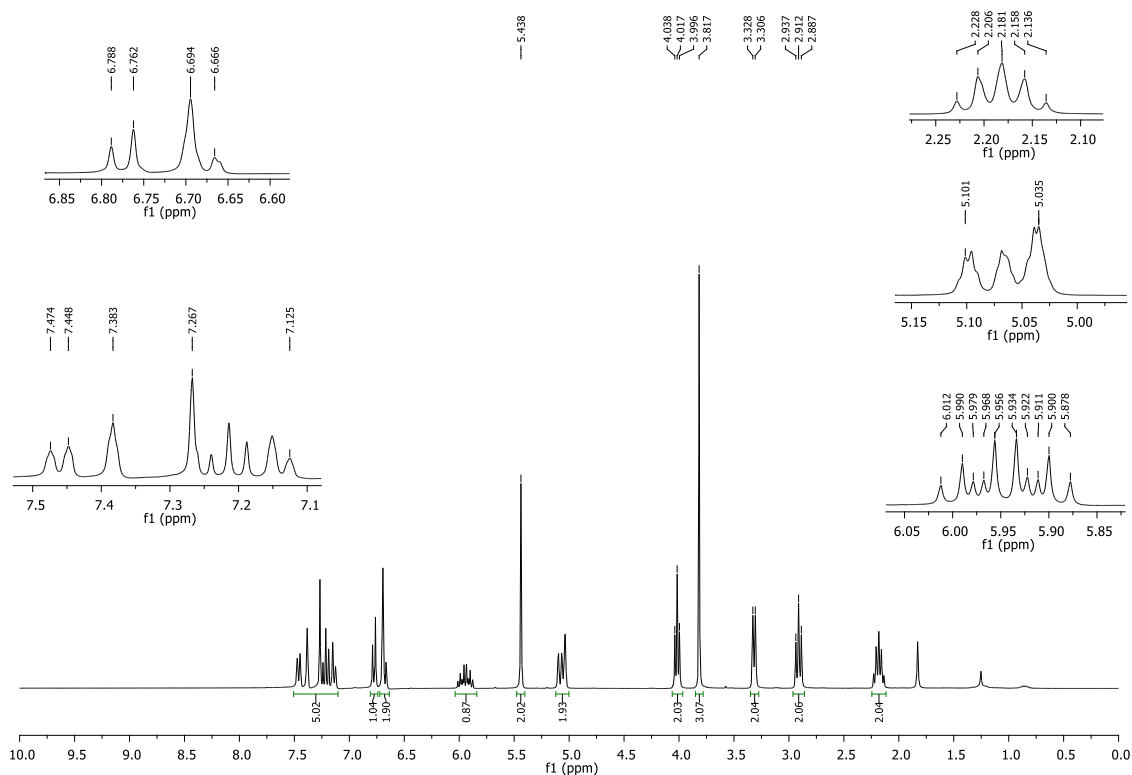

**Fig. CB.**  $^1\text{H}$  NMR spectrum (300 MHz,  $\text{CDCl}_3$ ) of 4-(3-(4-allyl-2-methoxyphenoxy)propyl)-1-(3-bromobenzyl)-1*H*-1,2,3-triazole (**49**).

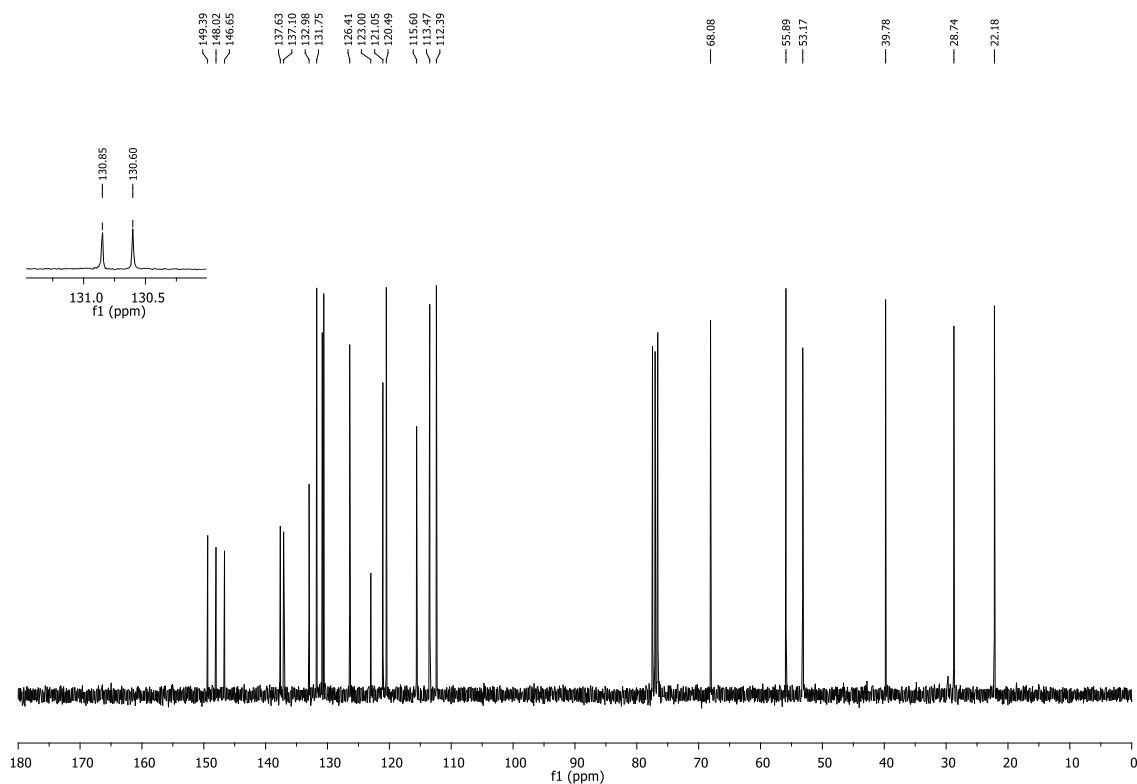

**Fig. CC.**  $^{13}\text{C}$  NMR spectrum (75 MHz,  $\text{CDCl}_3$ ) of 4-(3-(4-allyl-2-methoxyphenoxy)propyl)-1-(3-bromobenzyl)-*1H*-1,2,3-triazole (**49**).



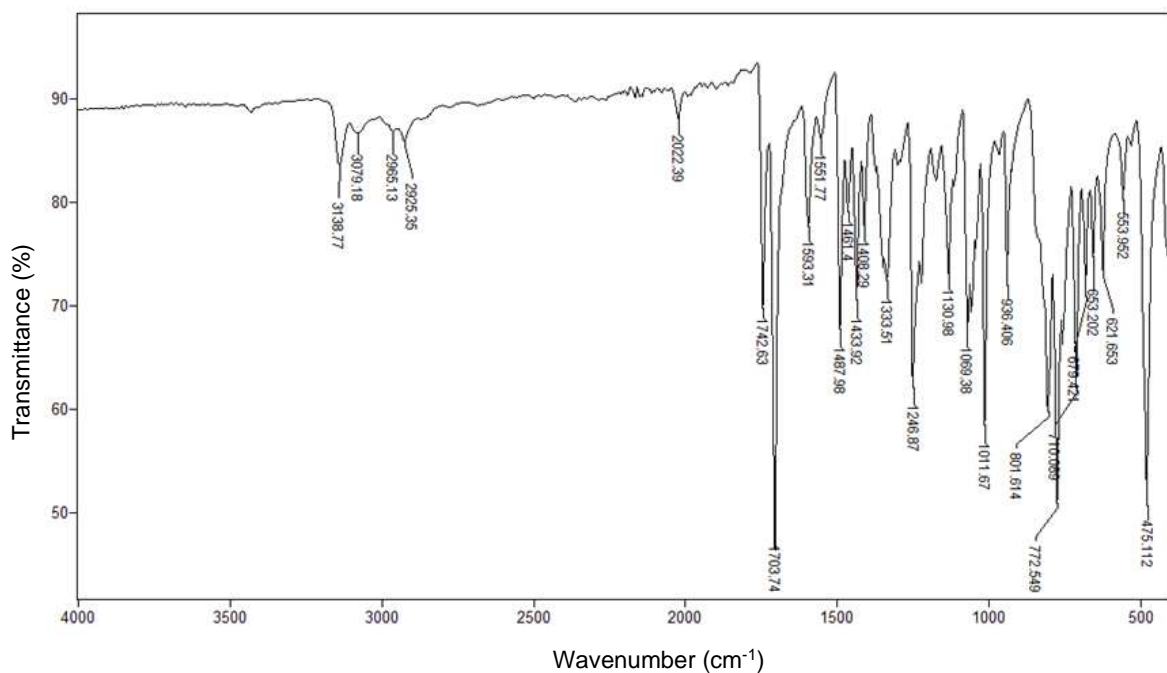

**Fig. CD.** IR spectrum (ATR) of 2,2-bis((1-(4-bromobenzyl)-1H-1,2,3-triazol-4-yl)methyl)-1H-indene-1,3(2H)-dione (**51**).

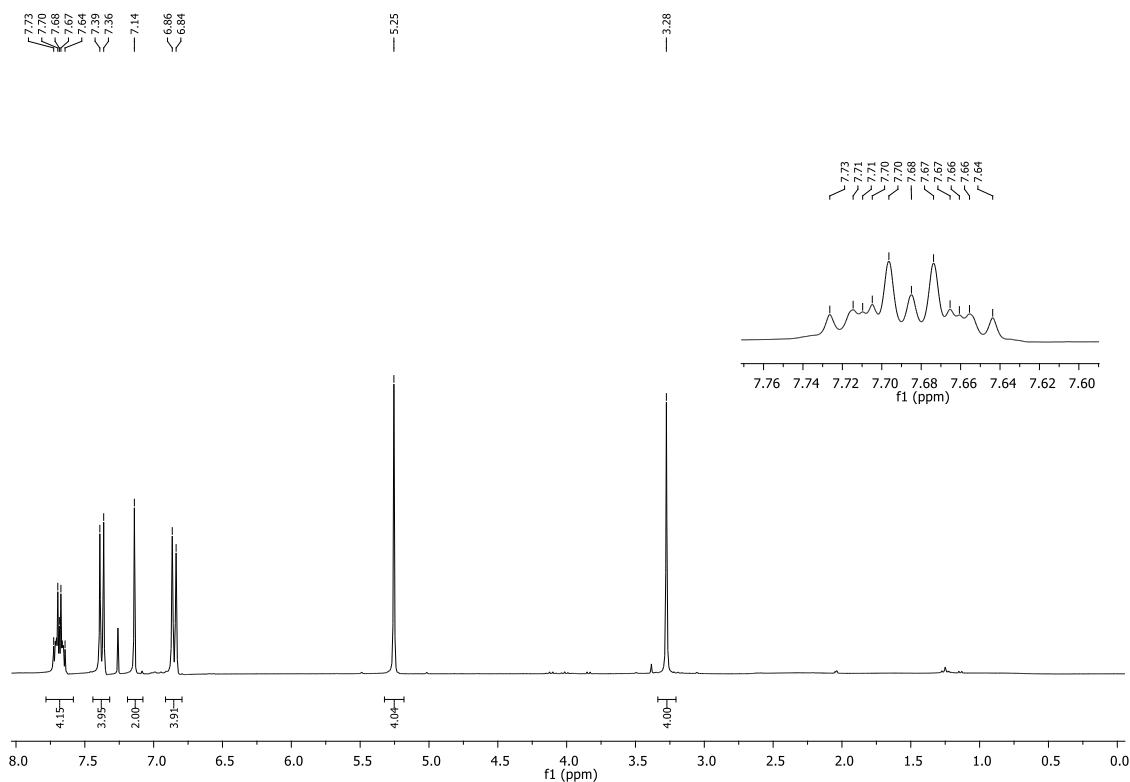

**Fig. CE.** <sup>1</sup>H NMR spectrum (300 MHz, CDCl<sub>3</sub>) of 2,2-bis((1-(4-bromobenzyl)-1H-1,2,3-triazol-4-yl)methyl)-1H-indene-1,3(2H)-dione (**51**).

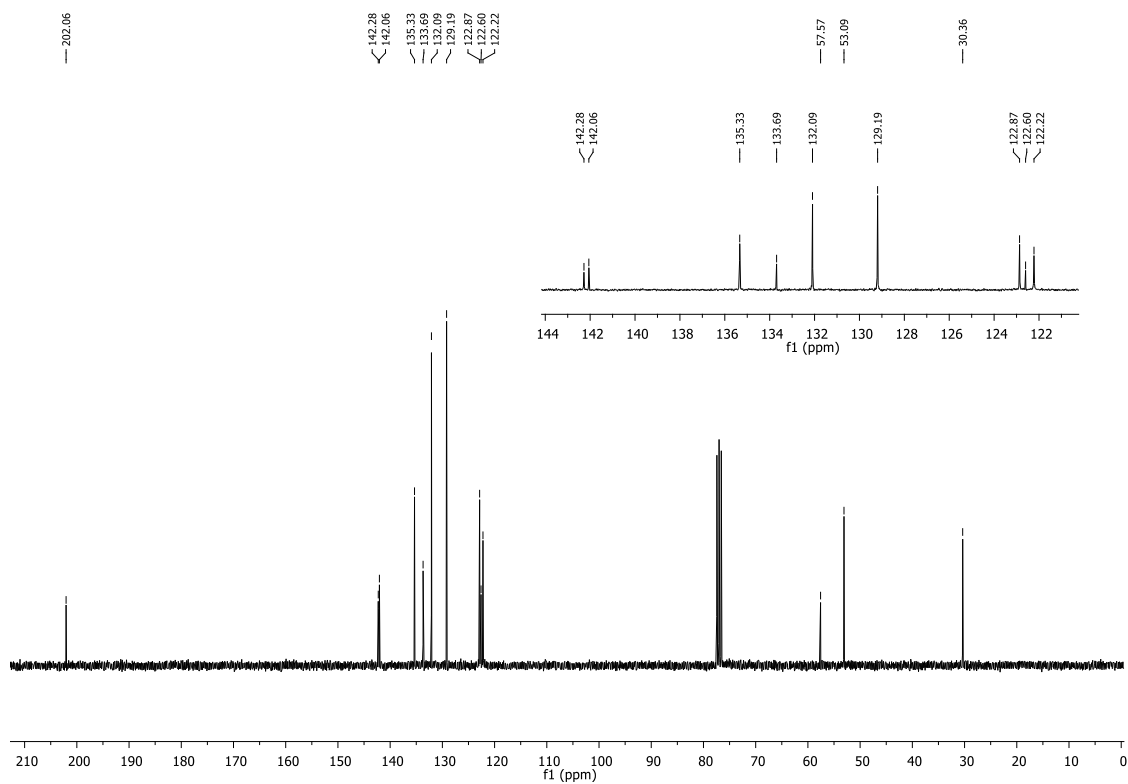

**Fig. CF.**  $^{13}\text{C}$  NMR spectrum (75 MHz,  $\text{CDCl}_3$ ) of 2,2-bis((1-(4-bromobenzyl)-1H-1,2,3-triazol-4-yl)methyl)-1H-indene-1,3(2H)-dione (**51**).

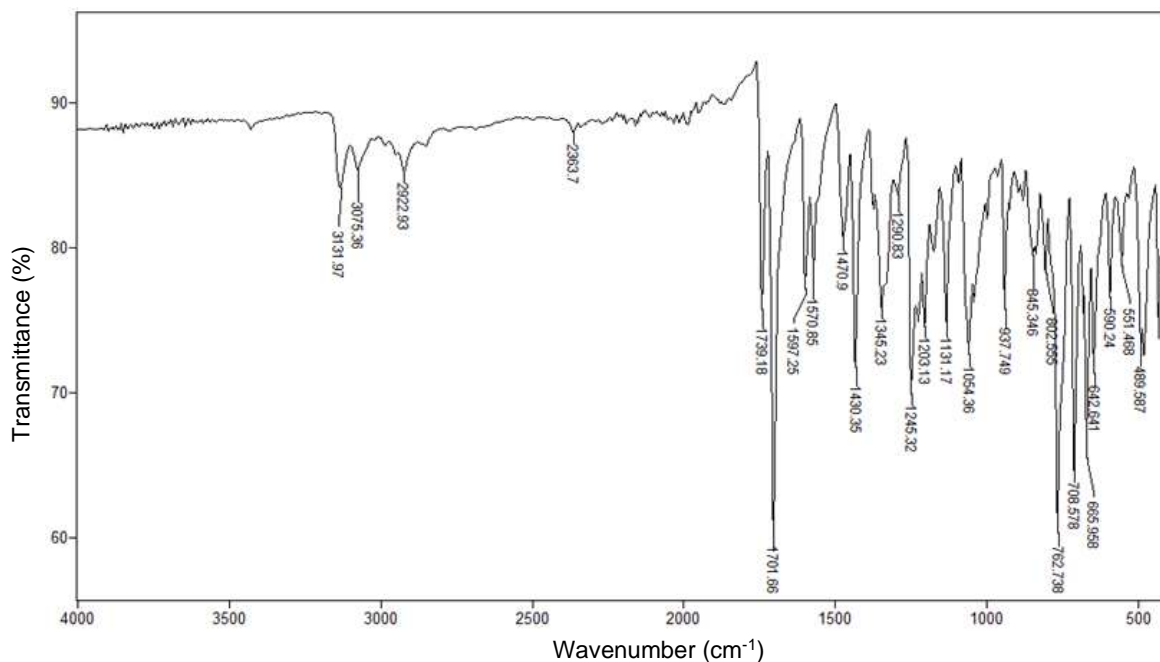

**Fig. CG.** IR spectrum (ATR) of 2,2-bis((1-(3-bromobenzyl)-1H-1,2,3-triazol-4-yl)methyl)-1H-indene-1,3(2H)-dione (**52**).

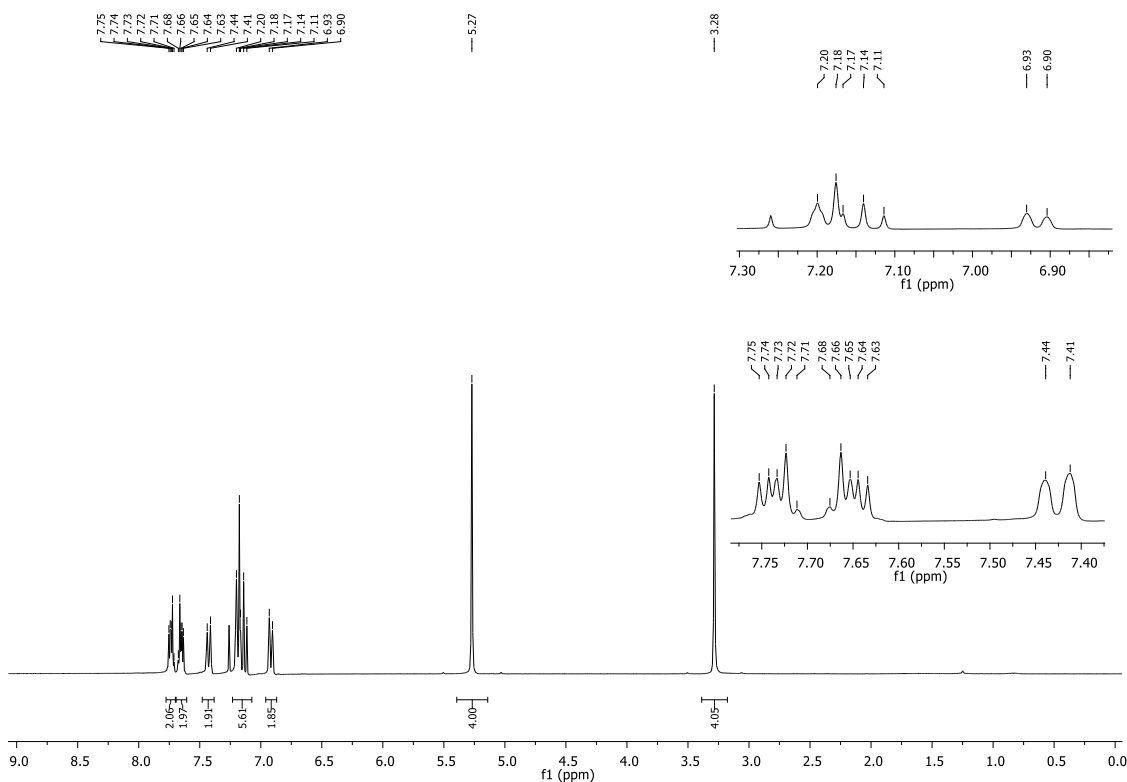

**Fig. CH.**  $^1\text{H}$  NMR spectrum (300 MHz,  $\text{CDCl}_3$ ) of 2,2-bis((1-(3-bromobenzyl)-1*H*-1,2,3-triazol-4-yl)methyl)-1*H*-indene-1,3(2*H*)-dione (**52**).

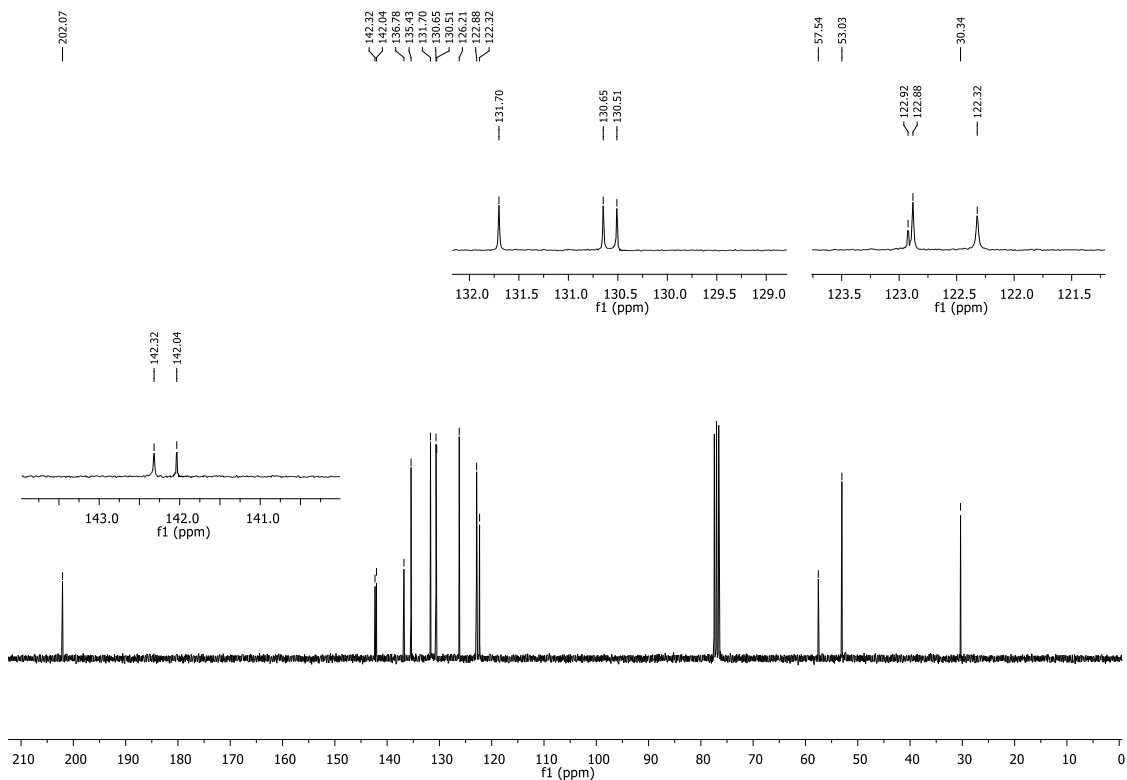

**Fig. CI.**  $^{13}\text{C}$  NMR spectrum (75 MHz,  $\text{CDCl}_3$ ) of 2,2-bis((1-(3-bromobenzyl)-1*H*-1,2,3-triazol-4-yl)methyl)-1*H*-indene-1,3(2*H*)-dione (**52**).

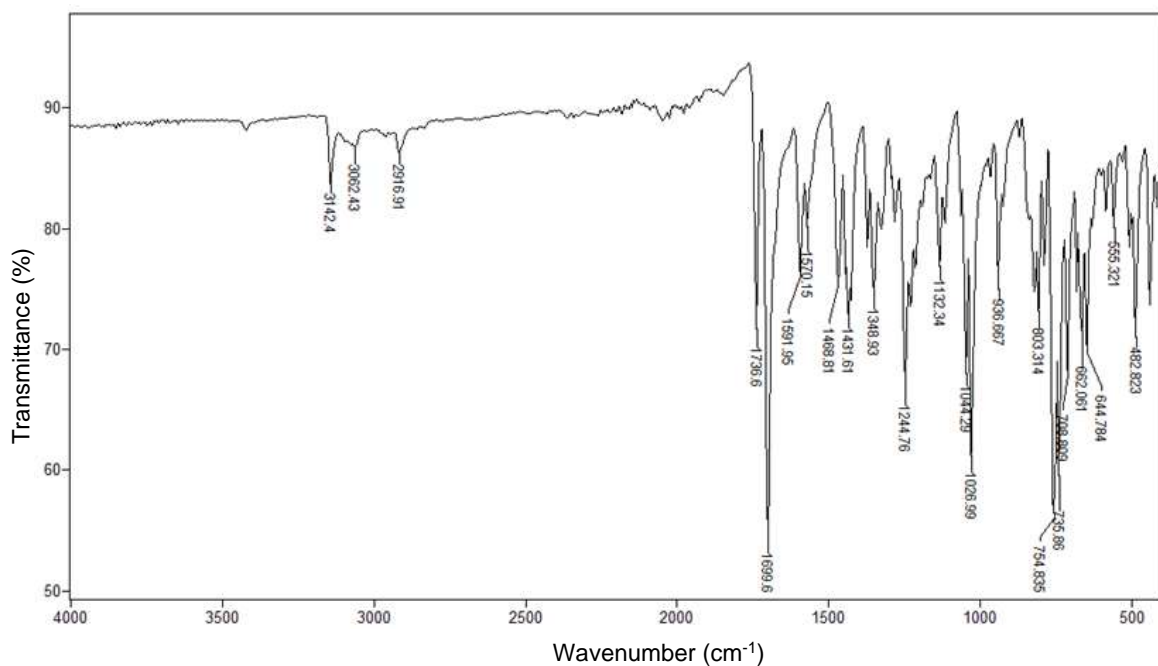

**Fig. CJ.** IR spectrum (ATR) of 2,2-bis((1-(2-bromobenzyl)-1H-1,2,3-triazol-4-yl)methyl)-1H-indene-1,3(2H)-dione (**53**).

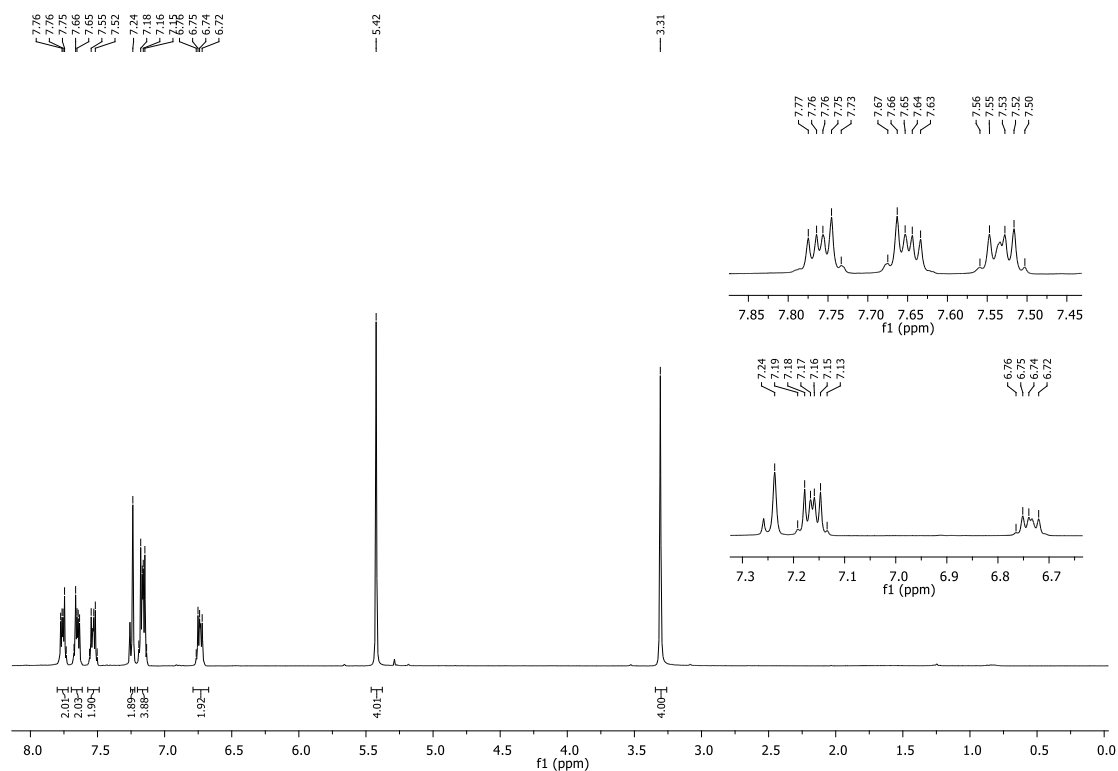

**Fig. CK.**  $^1\text{H}$  NMR spectrum (300 MHz,  $\text{CDCl}_3$ ) of 2,2-bis((1-(2-bromobenzyl)-1H-1,2,3-triazol-4-yl)methyl)-1H-indene-1,3(2H)-dione (**53**).

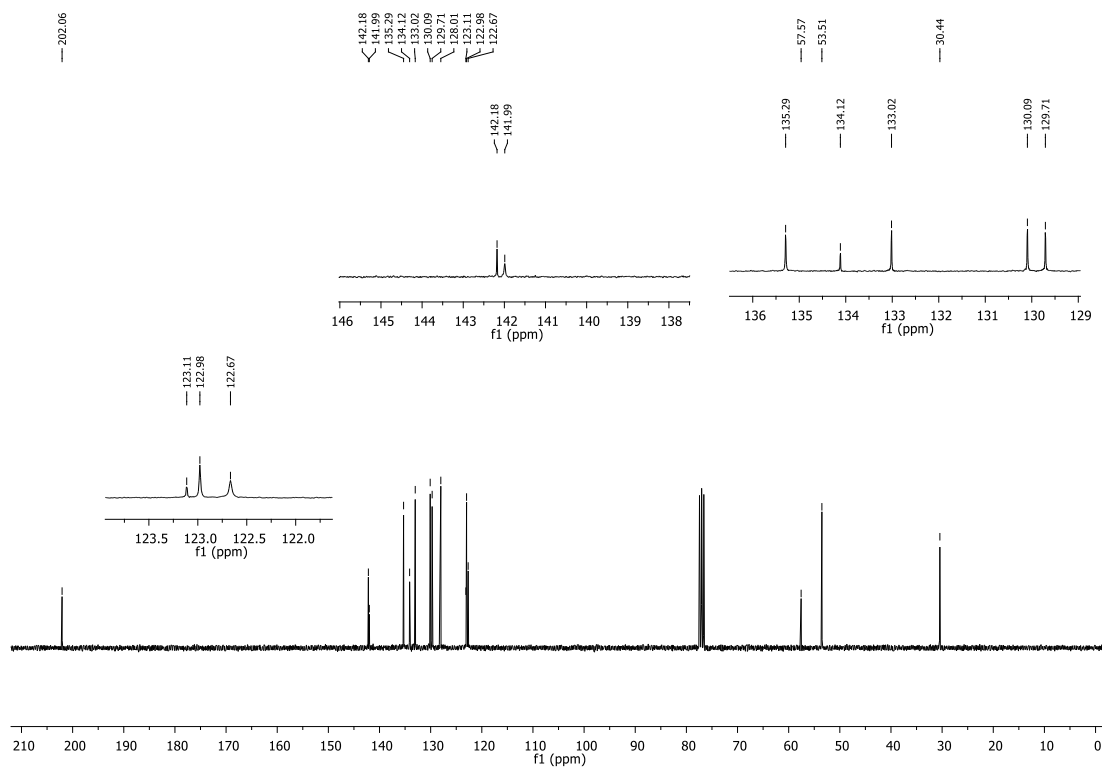

**Fig. CL.**  $^{13}\text{C}$  NMR spectrum (75 MHz,  $\text{CDCl}_3$ ) of 2,2-bis((1-(2-bromobenzyl)-1*H*-1,2,3-triazol-4-yl)methyl)-1*H*-indene-1,3(2*H*)-dione (**53**).

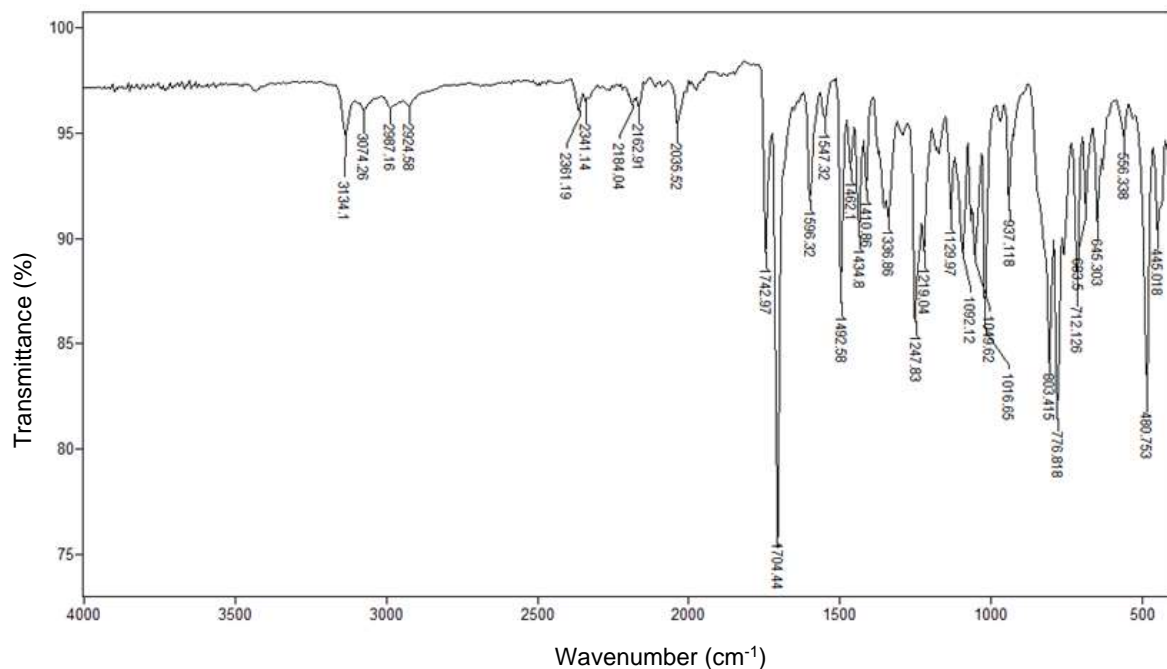

**Fig. CM.** IR spectrum (ATR) of 2,2-bis((1-(4-chlorobenzyl)-1*H*-1,2,3-triazol-4-yl)methyl)-1*H*-indene-1,3(2*H*)-dione (**54**).

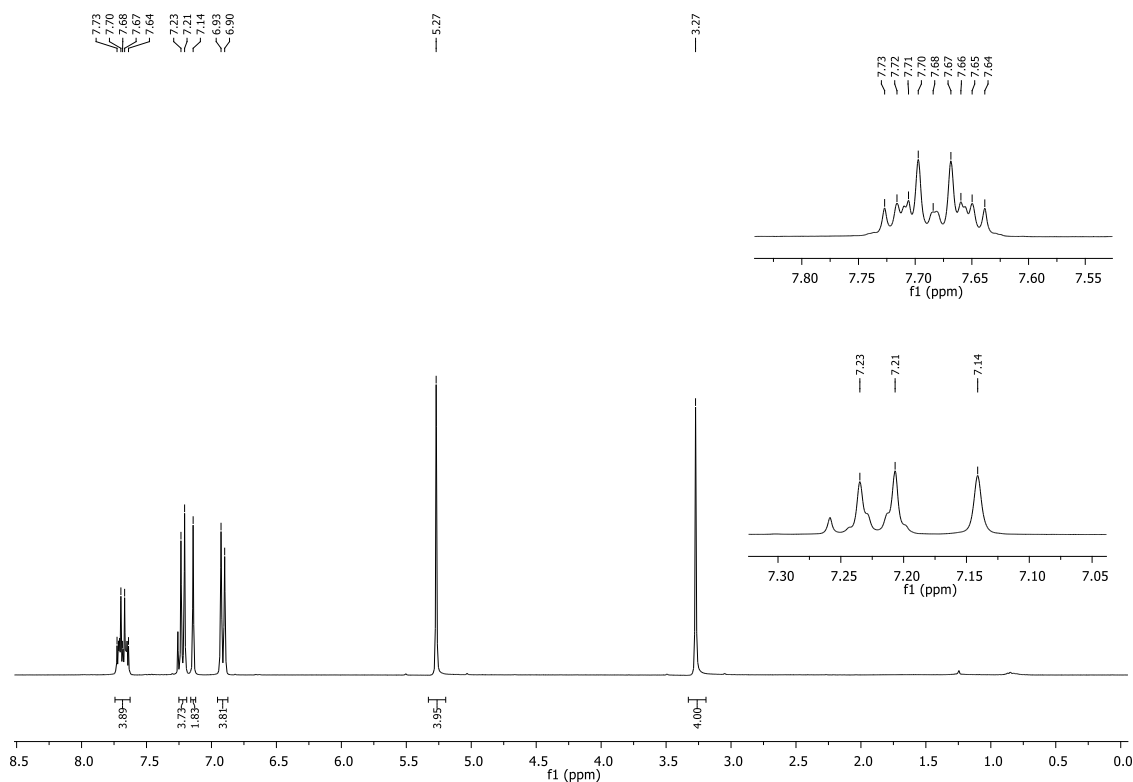

**Fig. CN.**  $^1\text{H}$  NMR spectrum (300 MHz,  $\text{CDCl}_3$ ) of 2,2-bis((1-(4-chlorobenzyl)-1H-1,2,3-triazol-4-yl)methyl)-1H-indene-1,3(2H)-dione (**54**).

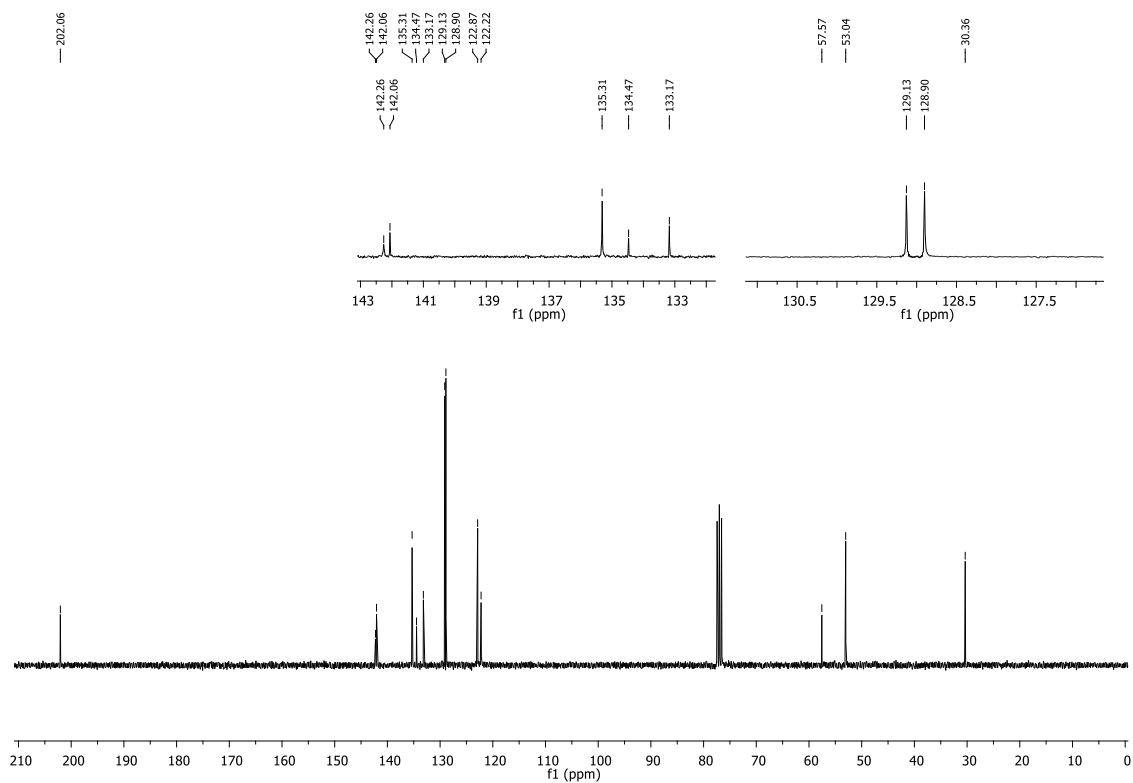

**Fig. CO.**  $^{13}\text{C}$  NMR spectrum (75 MHz,  $\text{CDCl}_3$ ) of 2,2-bis((1-(4-chlorobenzyl)-1H-1,2,3-triazol-4-yl)methyl)-1H-indene-1,3(2H)-dione (**54**).

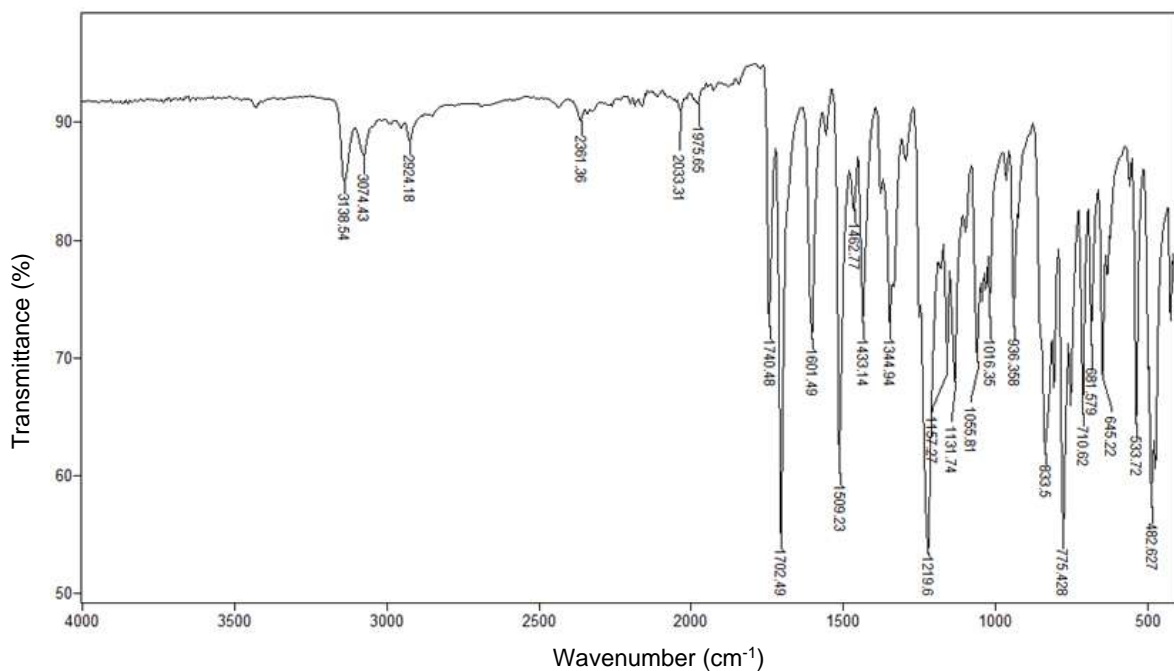

**Fig. CP.** IR spectrum (ATR) of 2,2-bis((1-(4-fluorobenzyl)-1H-1,2,3-triazol-4-yl)methyl)-1H-indene-1,3(2H)-dione (**55**).

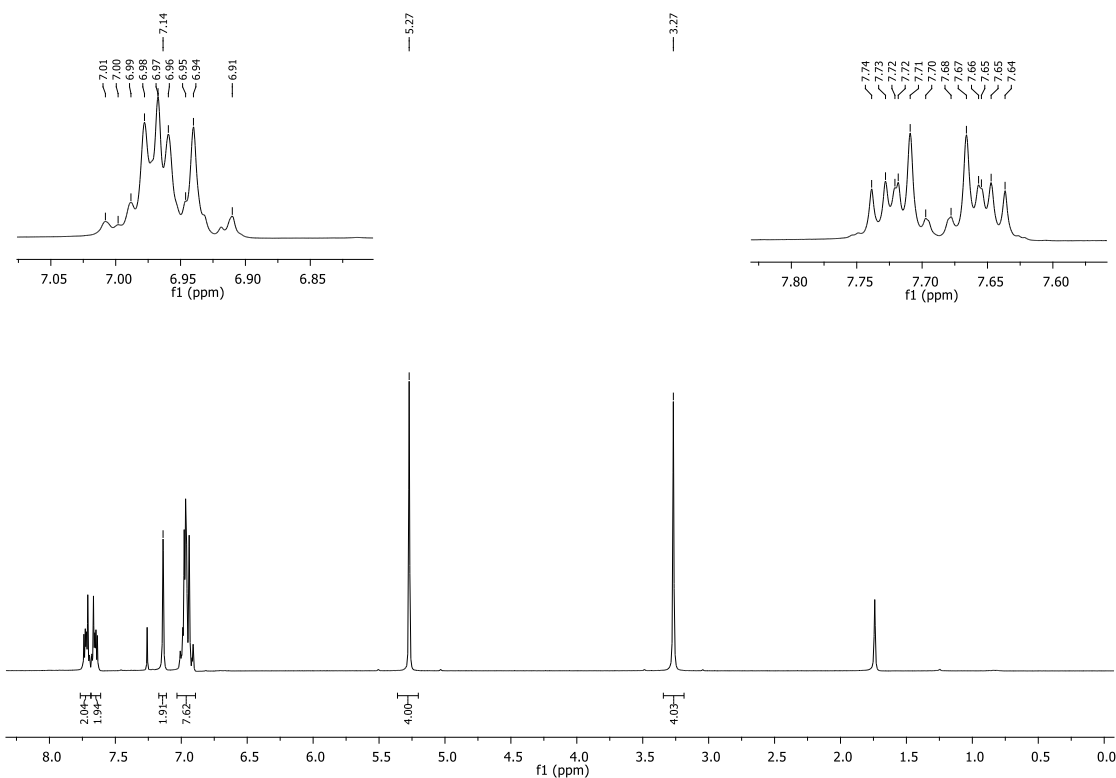

**Fig. CQ.** <sup>1</sup>H NMR spectrum (300 MHz, CDCl<sub>3</sub>) of 2,2-bis((1-(4-fluorobenzyl)-1H-1,2,3-triazol-4-yl)methyl)-1H-indene-1,3(2H)-dione (**55**).

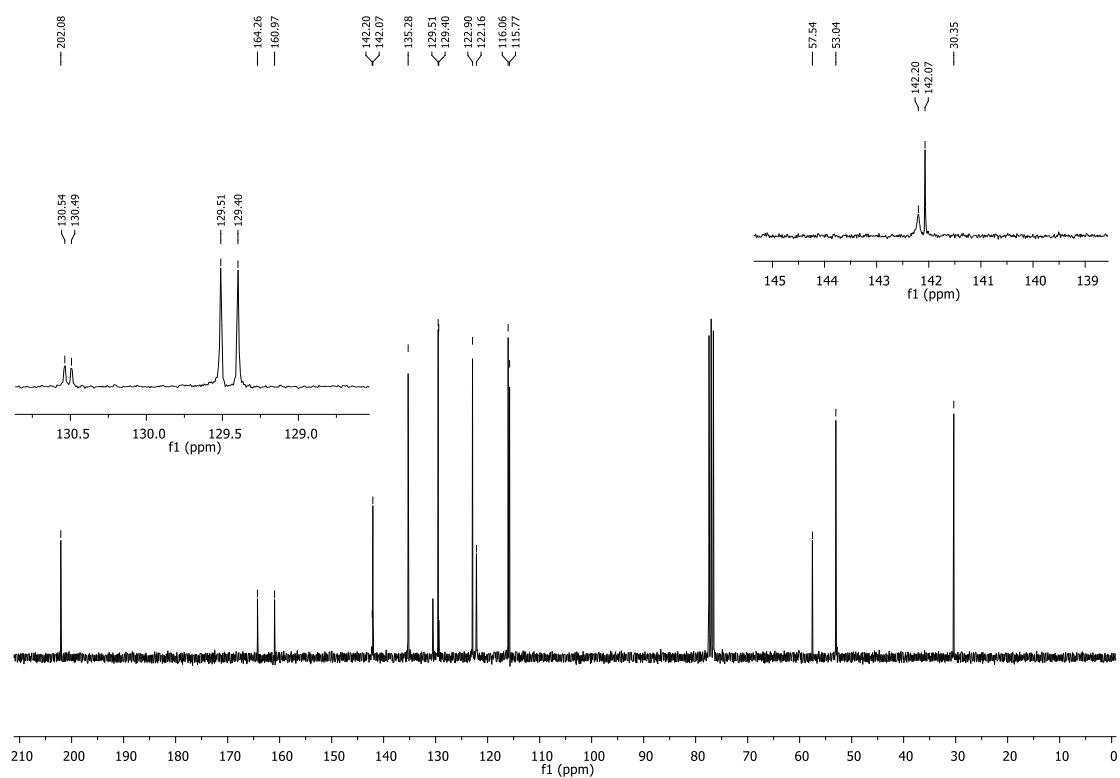

**Fig. CR.** <sup>13</sup>C NMR spectrum (75 MHz, CDCl<sub>3</sub>) of 2,2-bis((1-(4-fluorobenzyl)-1*H*-1,2,3-triazol-4-yl)methyl)-1*H*-indene-1,3(2*H*)-dione (**55**).

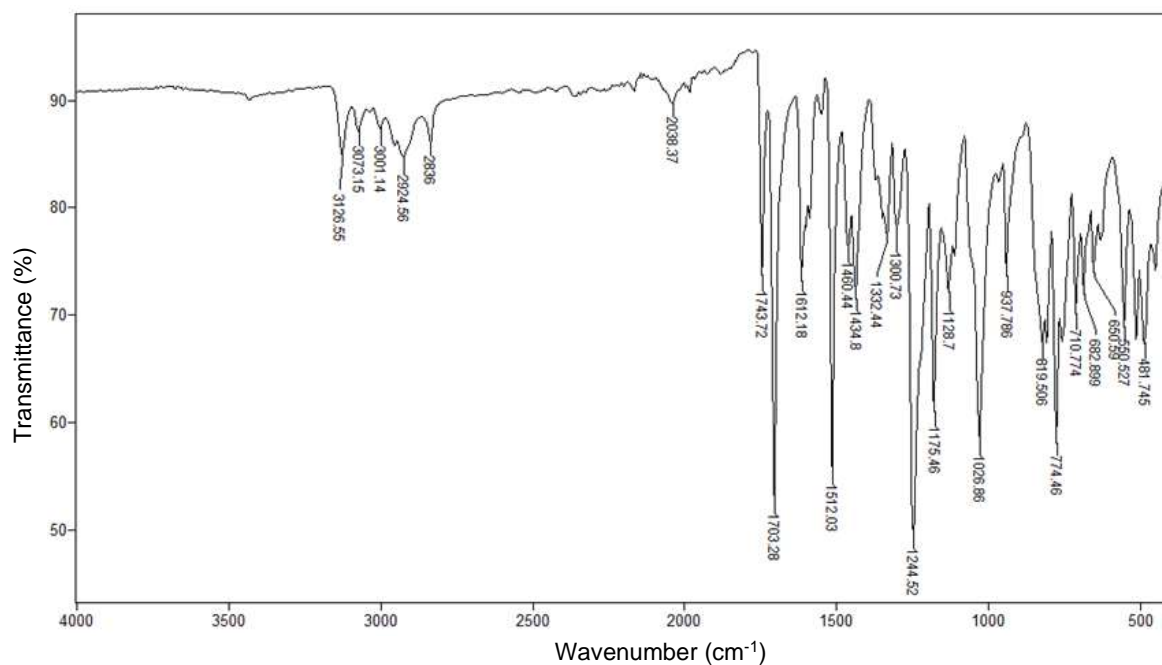

**Fig. CS.** IR spectrum (ATR) of 2,2-bis((1-(4-methoxybenzyl)-1*H*-1,2,3-triazol-4-yl)methyl)-1*H*-indene-1,3(2*H*)-dione (**56**).



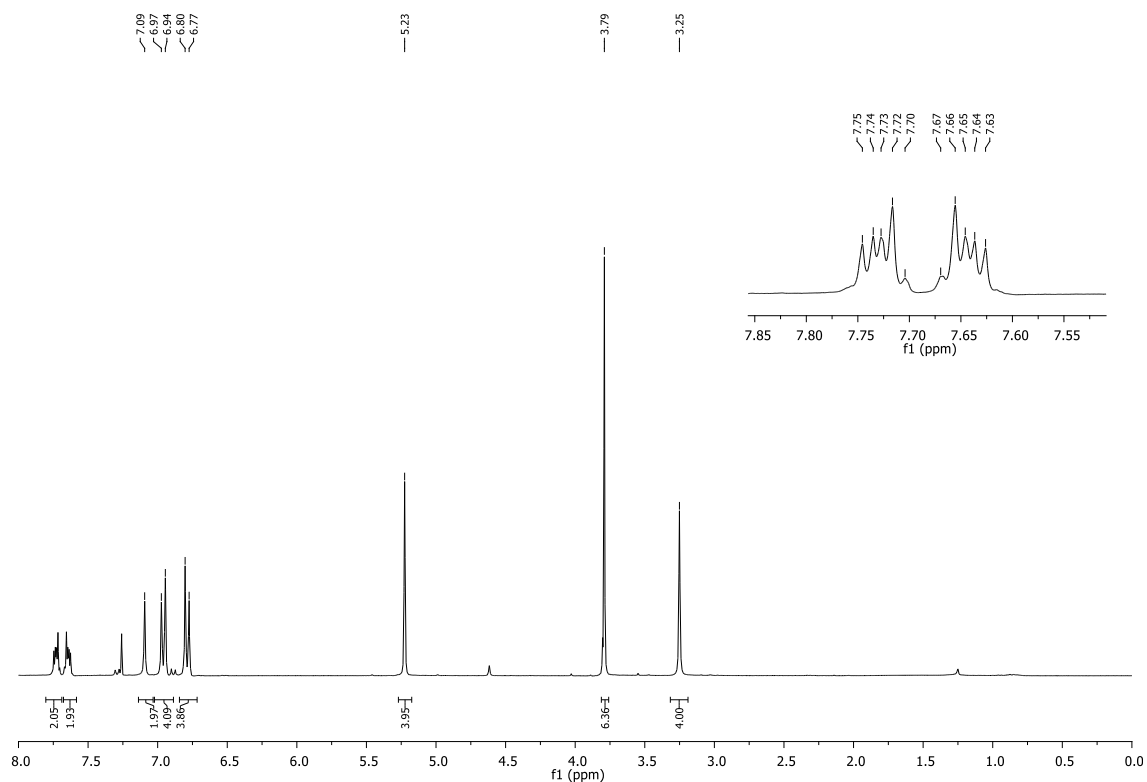

**Fig. CT.**  $^1\text{H}$  NMR spectrum (300 MHz,  $\text{CDCl}_3$ ) of 2,2-bis((1-(4-methoxybenzyl)-1*H*-1,2,3-triazol-4-yl)methyl)-1*H*-indene-1,3(2*H*)-dione (**56**).

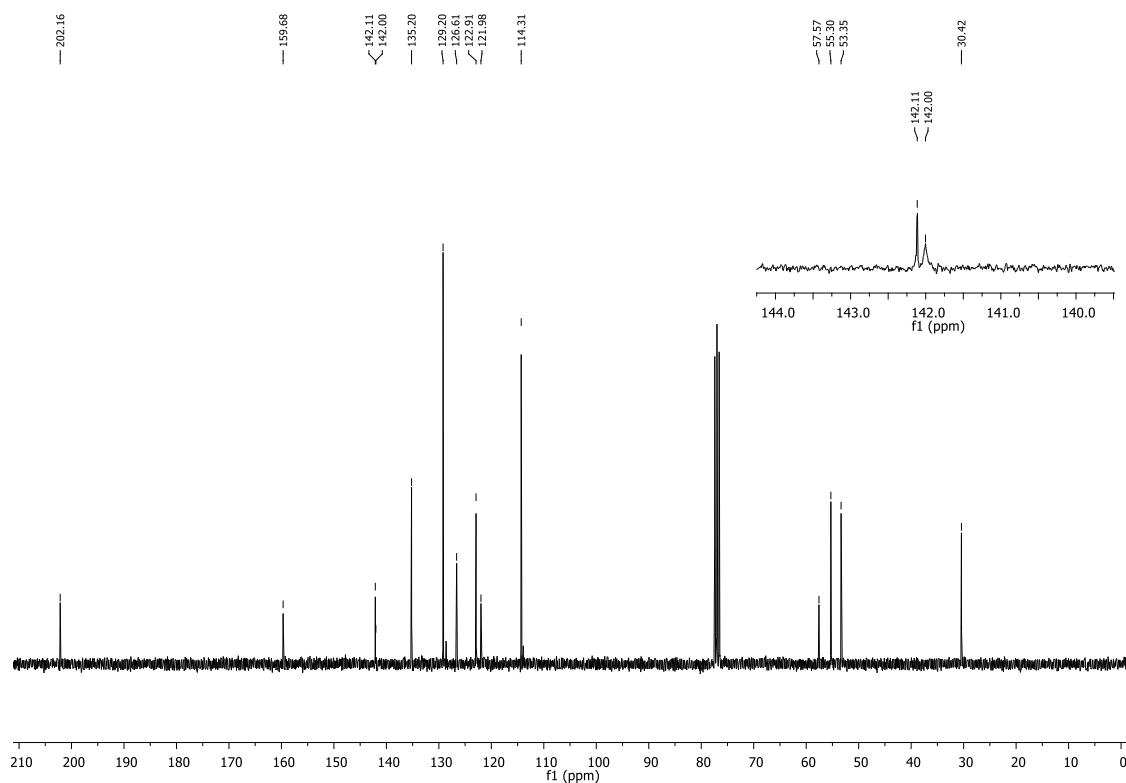

**Fig. CU.**  $^{13}\text{C}$  NMR spectrum (75 MHz,  $\text{CDCl}_3$ ) of 2,2-bis((1-(4-methoxybenzyl)-1*H*-1,2,3-triazol-4-yl)methyl)-1*H*-indene-1,3(2*H*)-dione (**56**).

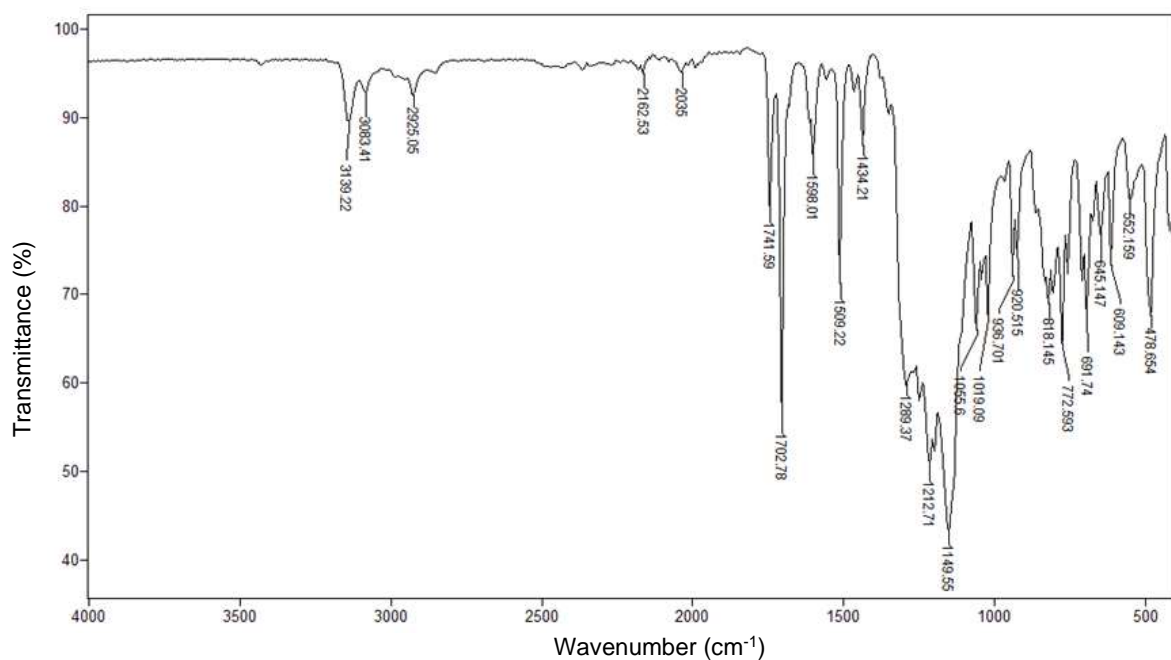

**Fig. CV.** IR spectrum (ATR) of 2,2-bis((1-(4-(trifluoromethoxy)benzyl)-1H-1,2,3-triazol-4-yl)methyl)-1H-indene-1,3(2H)-dione (**57**).

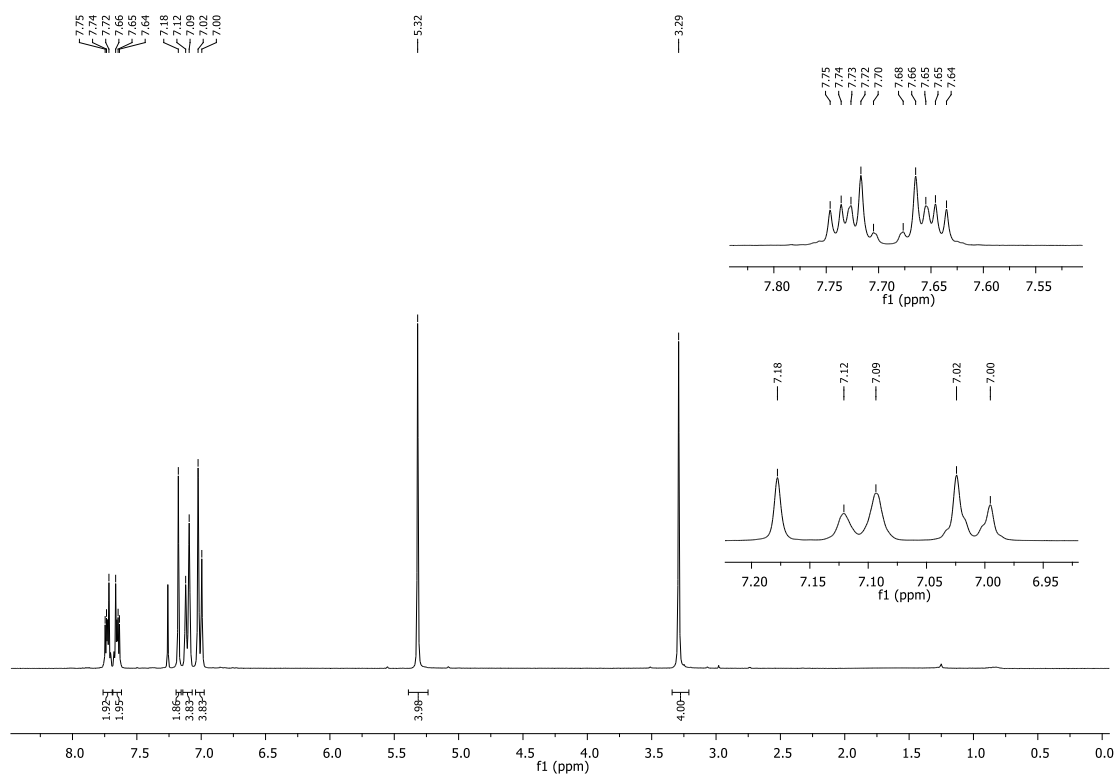

**Fig. CX.** <sup>1</sup>H NMR spectrum (300 MHz, CDCl<sub>3</sub>) of 2,2-bis((1-(4-(trifluoromethoxy)benzyl)-1H-1,2,3-triazol-4-yl)methyl)-1H-indene-1,3(2H)-dione (**57**).

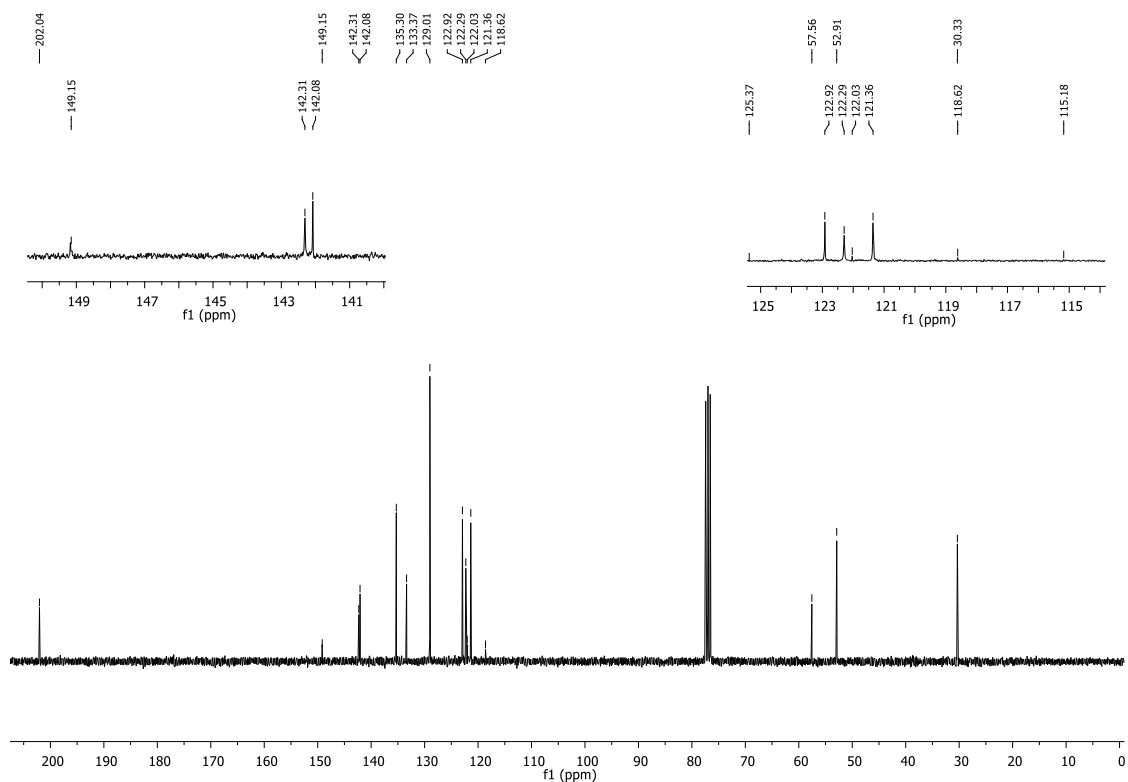

**Fig. CW.**  $^{13}\text{C}$  NMR spectrum (75 MHz,  $\text{CDCl}_3$ ) of 2,2-bis((1-(4-(trifluoromethoxy)benzyl)-1*H*-1,2,3-triazol-4-yl)methyl)-1*H*-indene-1,3(2*H*)-dione (**57**).

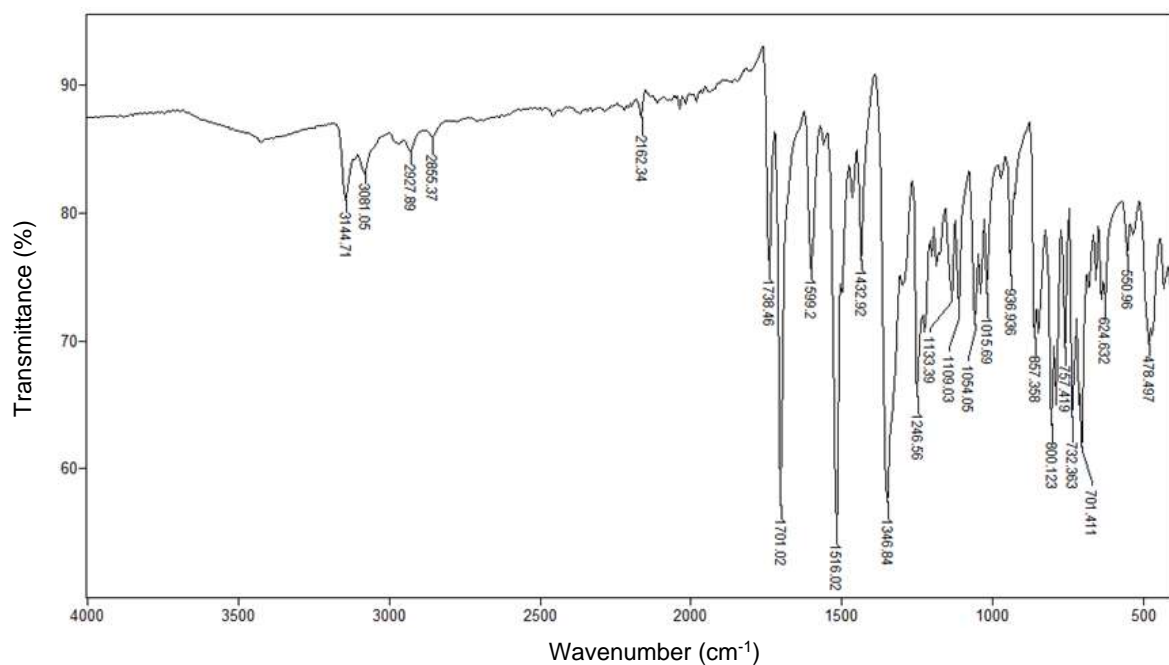

**Fig. CY.** IR spectrum (ATR) of 2,2-bis((1-(4-nitrobenzyl)-1*H*-1,2,3-triazol-4-yl)methyl)-1*H*-indene-1,3(2*H*)-dione (**58**).

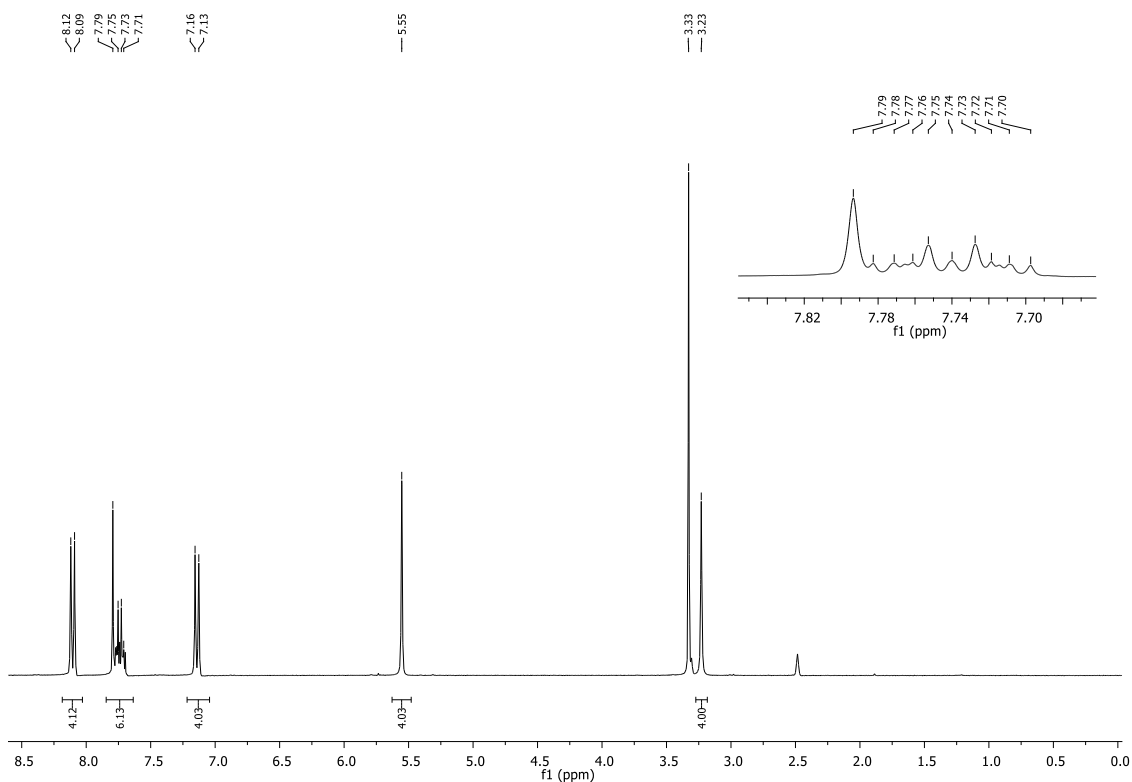

**Fig. CZ.**  $^1\text{H}$  NMR spectrum (300 MHz,  $\text{DMSO-}d_6$ ) of 2,2-bis((1-(4-nitrobenzyl)-1H-1,2,3-triazol-4-yl)methyl)-1H-indene-1,3(2H)-dione (**58**).

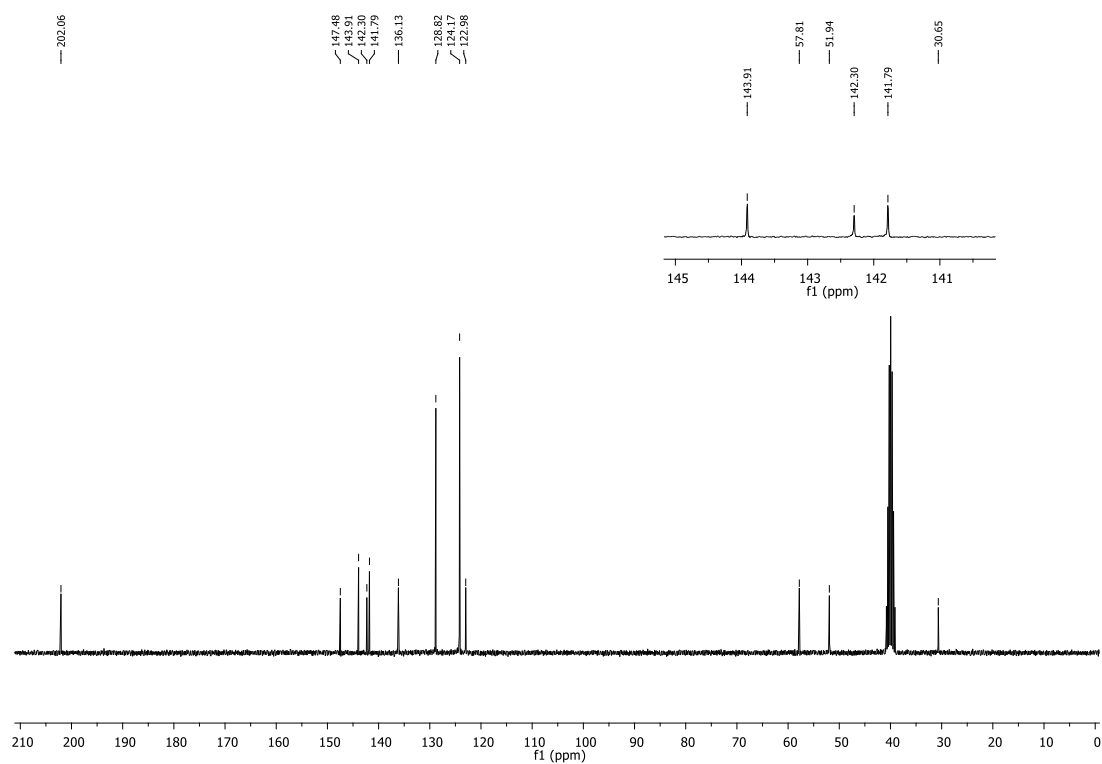

**Fig. DA.**  $^{13}\text{C}$  NMR spectrum (75 MHz,  $\text{DMSO-}d_6$ ) of 2,2-bis((1-(4-nitrobenzyl)-1H-1,2,3-triazol-4-yl)methyl)-1H-indene-1,3(2H)-dione (**58**).

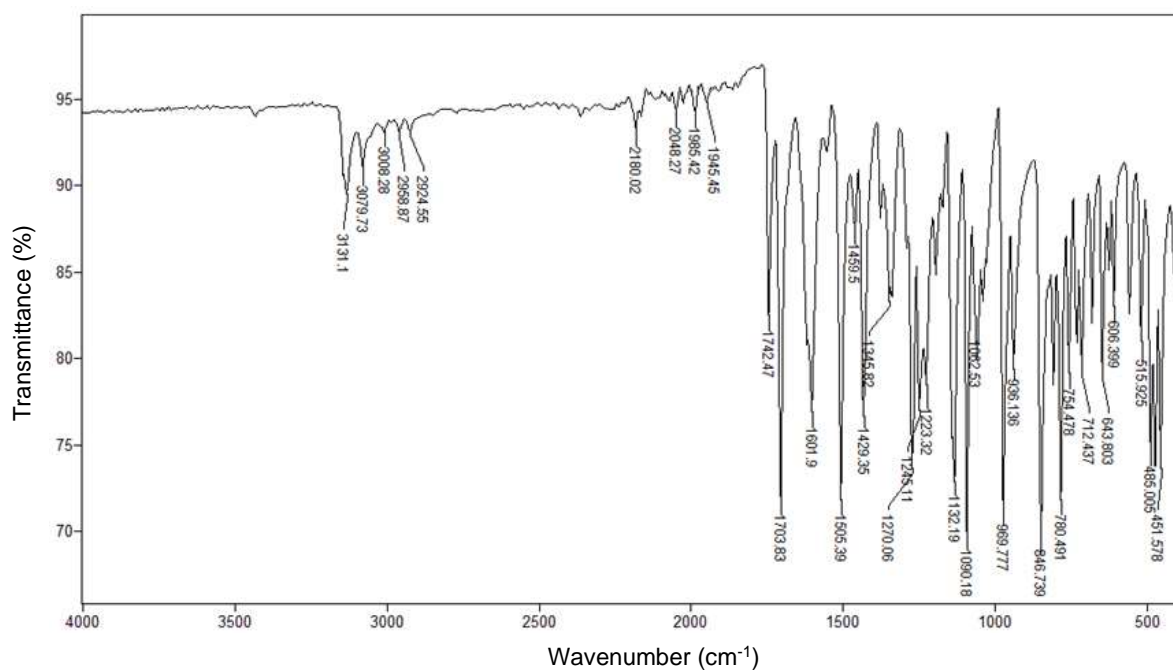

**Fig. DB.** IR spectrum (ATR) of 2,2-bis((1-(2,4-difluorobenzyl)-1H-1,2,3-triazol-4-yl)methyl)-1H-indene-1,3(2H)-dione (**59**).

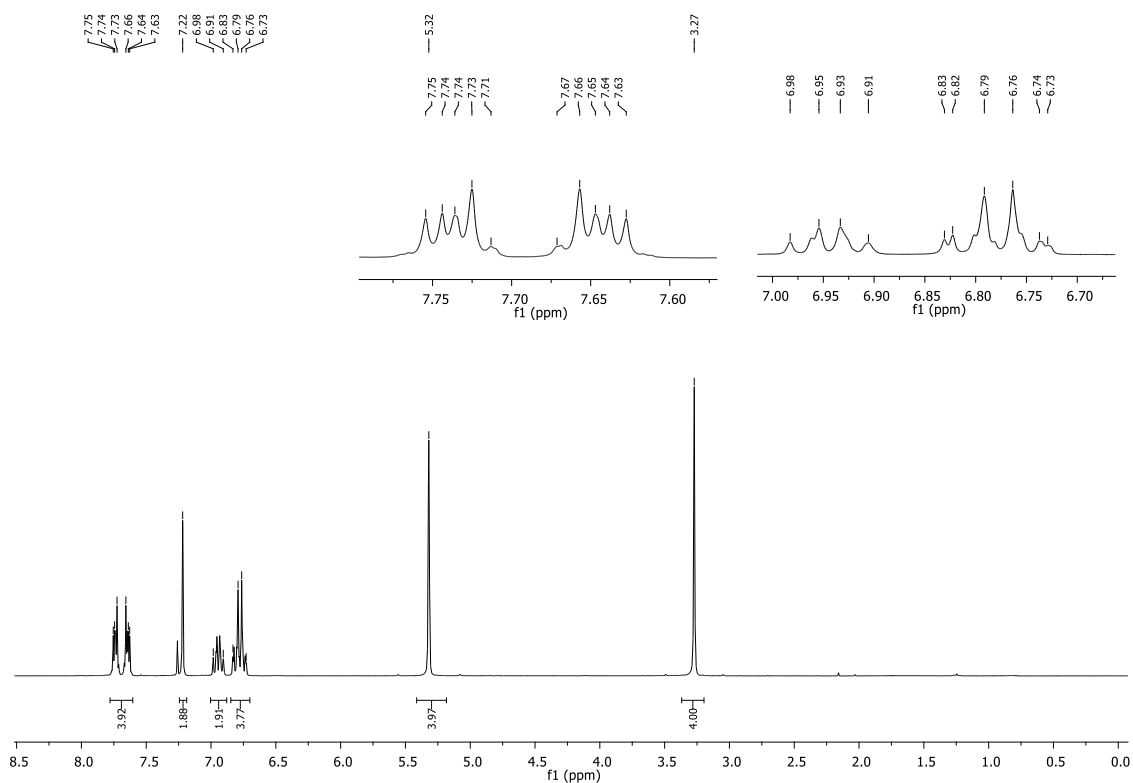

**Fig. DC.** <sup>1</sup>H NMR spectrum (300 MHz, CDCl<sub>3</sub>) of 2,2-bis((1-(2,4-difluorobenzyl)-1H-1,2,3-triazol-4-yl)methyl)-1H-indene-1,3(2H)-dione (**59**).

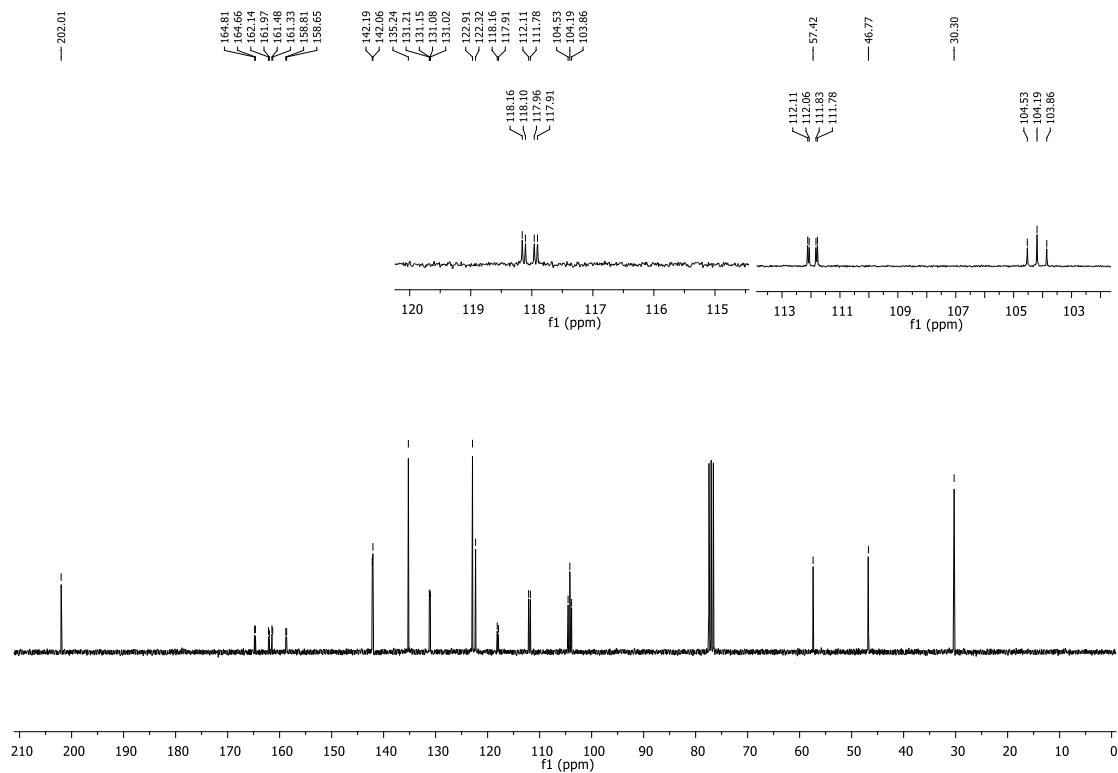

**Fig. DD.**  $^{13}\text{C}$  NMR spectrum (75 MHz,  $\text{CDCl}_3$ ) of 2,2-*bis*((1-(2,4-difluorobenzyl)-1*H*-1,2,3-triazol-4-yl)methyl)-1*H*-indene-1,3(2*H*)-dione (**59**).

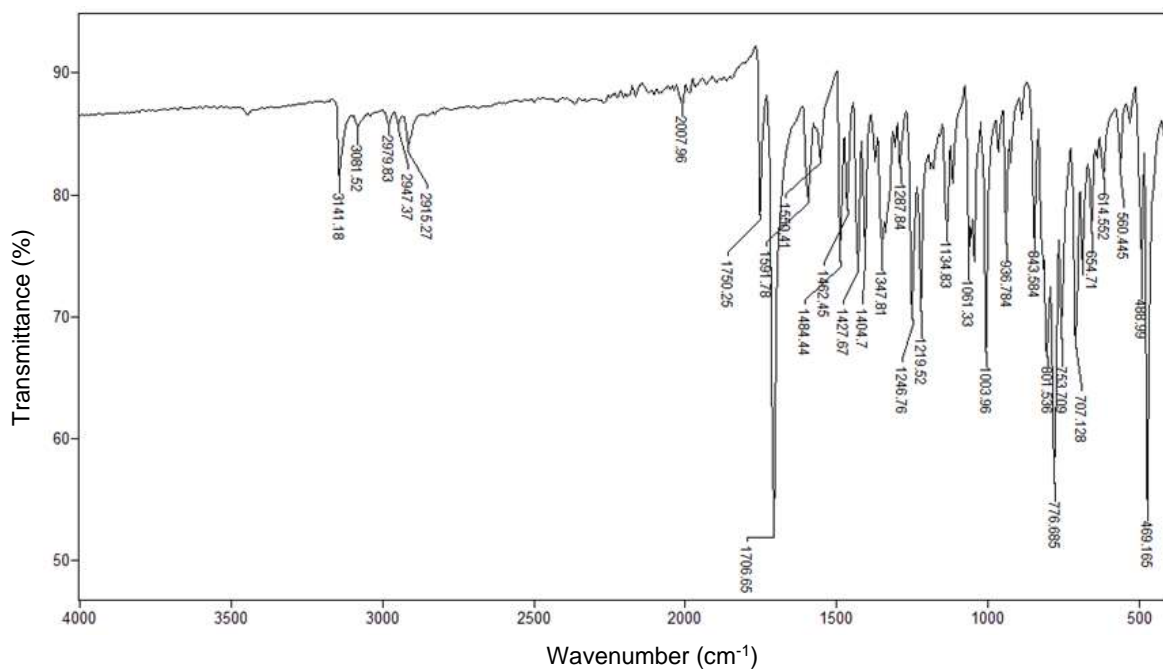

**Fig. DE.** IR spectrum (ATR) of 2,2-*bis*((1-(4-iodobenzyl)-1*H*-1,2,3-triazol-4-yl)methyl)-1*H*-indene-1,3(2*H*)-dione (**60**).

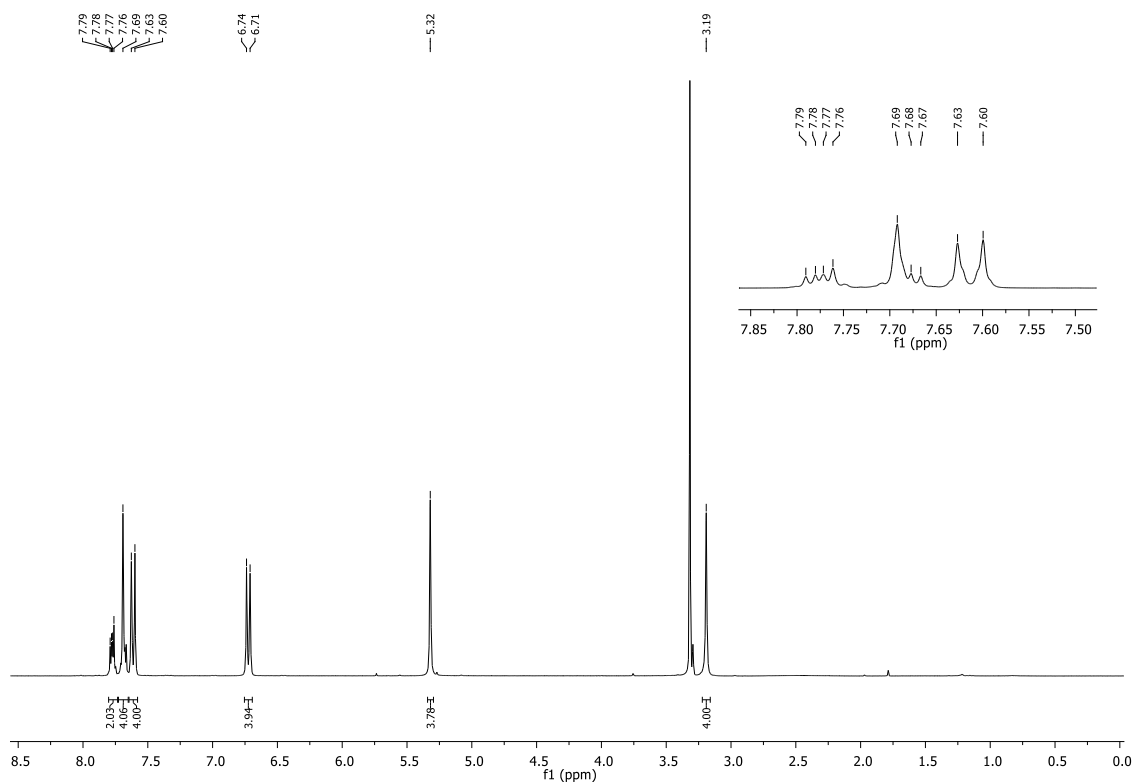

**Fig. DF.**  $^1\text{H}$  NMR spectrum (300 MHz,  $\text{DMSO-}d_6$ ) of 2,2-bis((1-(4-iodobenzyl)-1*H*-1,2,3-triazol-4-yl)methyl)-1*H*-indene-1,3(2*H*)-dione (**60**).

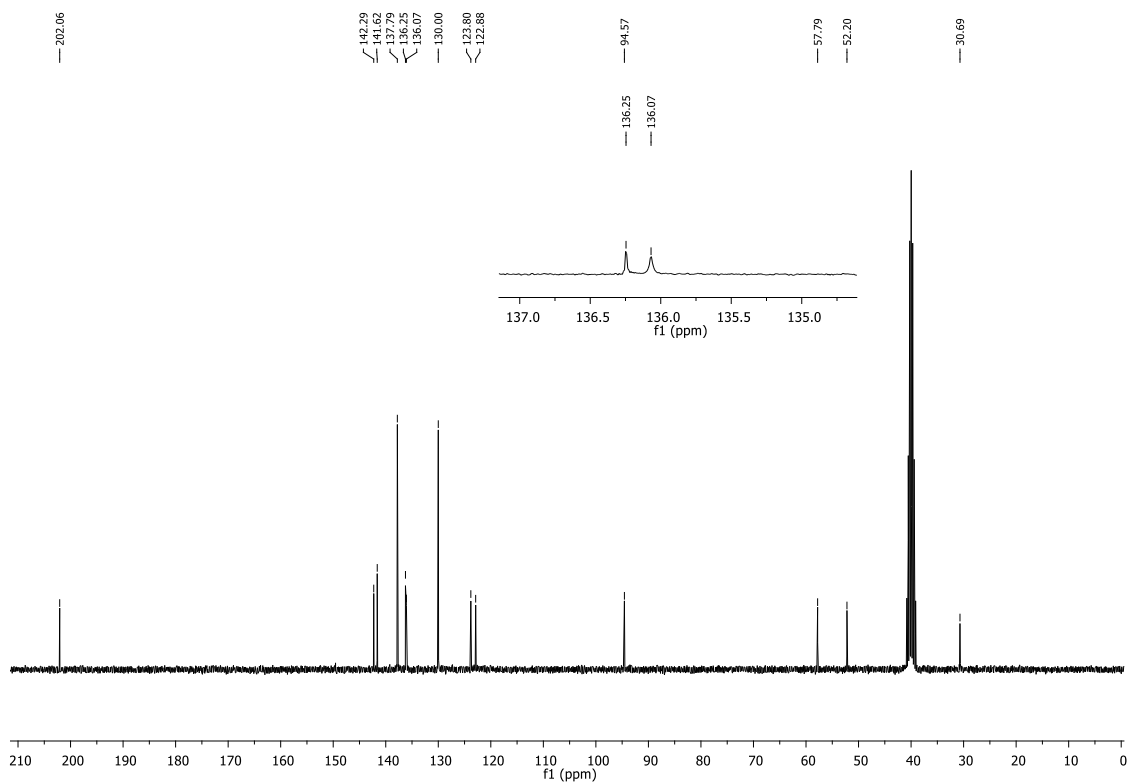

**Fig. DG.**  $^{13}\text{C}$  NMR spectrum (75 MHz,  $\text{DMSO-}d_6$ ) of 2,2-bis((1-(4-iodobenzyl)-1*H*-1,2,3-triazol-4-yl)methyl)-1*H*-indene-1,3(2*H*)-dione (**60**).

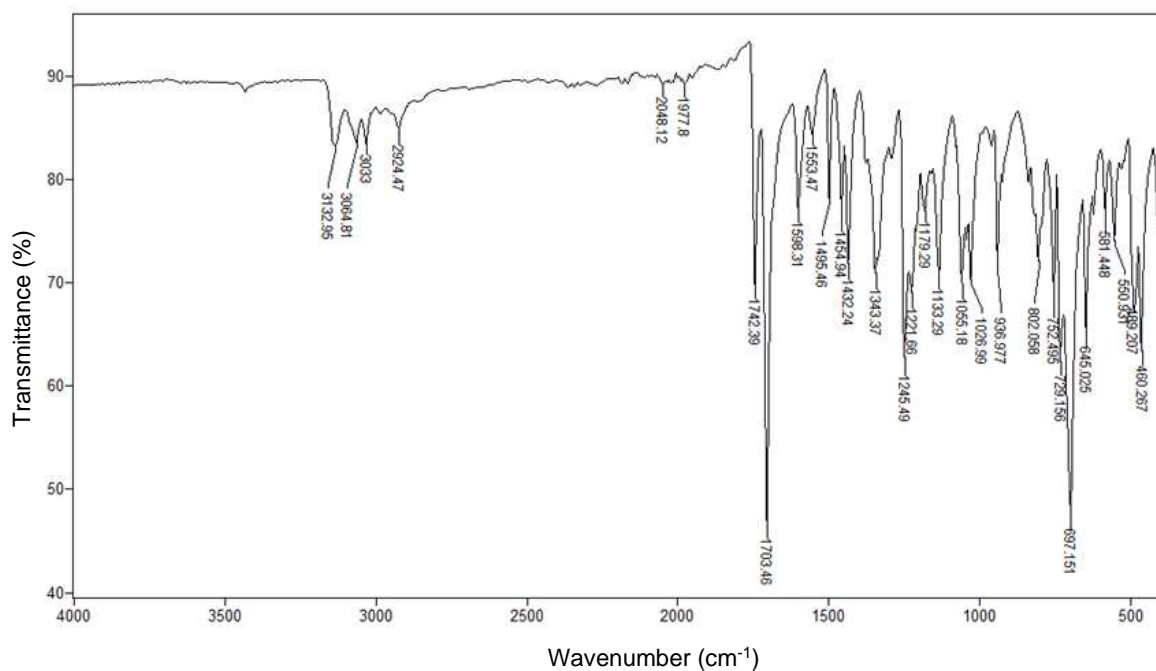

**Fig. DI.** IR spectrum (ATR) of 2,2-bis((1-(2-benzyl-1H-1,2,3-triazol-4-yl)methyl)-1H-indene-1,3(2H)-dione (**61**).

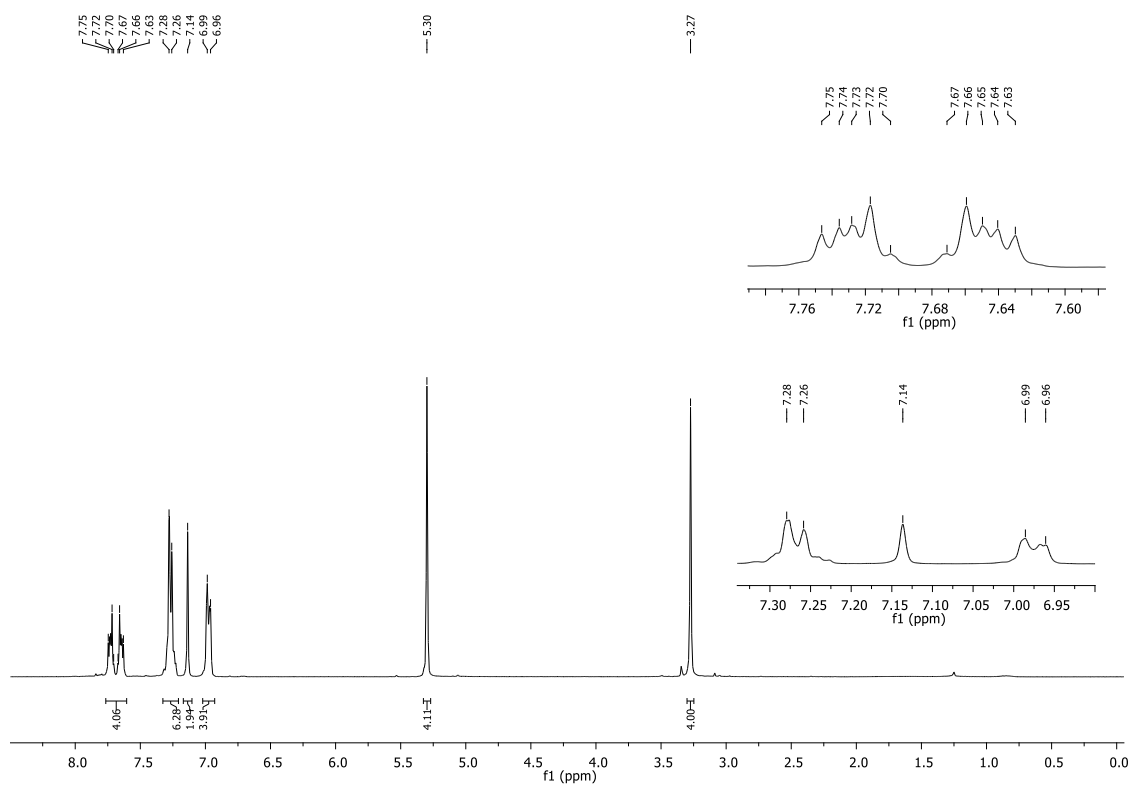

**Fig. DI.** <sup>1</sup>H NMR spectrum (300 MHz, CDCl<sub>3</sub>) of 2,2-bis((1-(2-benzyl-1H-1,2,3-triazol-4-yl)methyl)-1H-indene-1,3(2H)-dione (**61**).



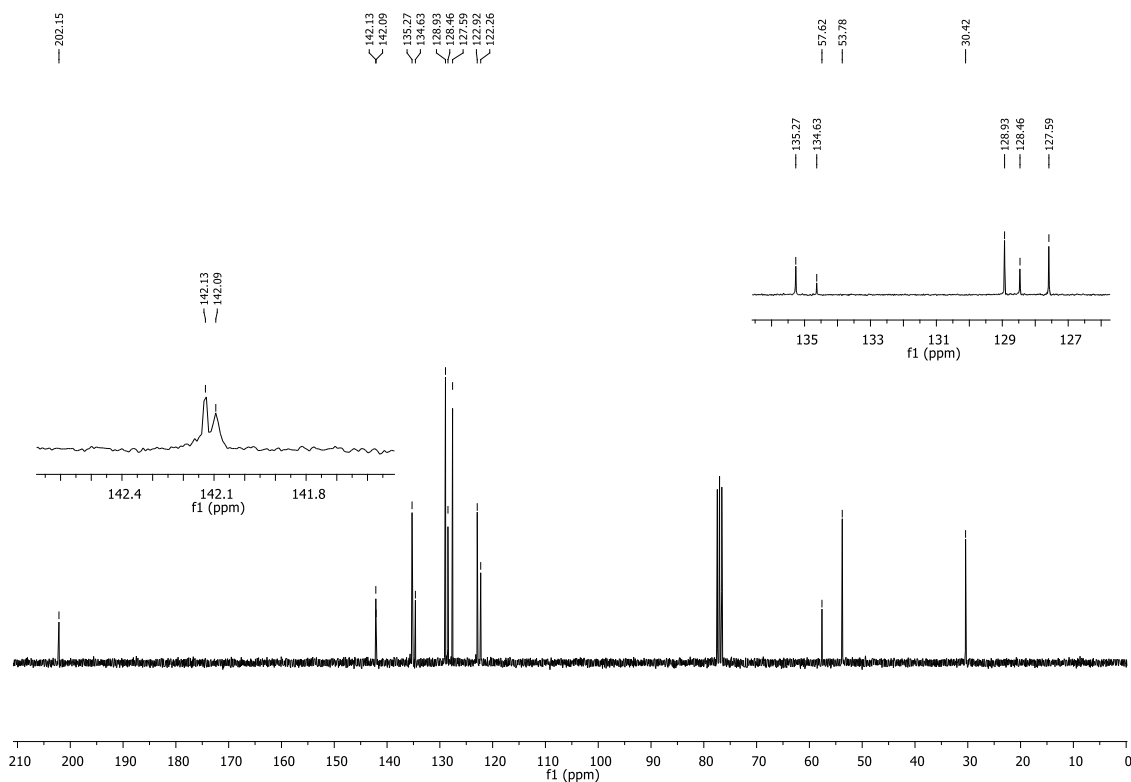

**Fig. DJ.** <sup>13</sup>C NMR spectrum (75 MHz, CDCl<sub>3</sub>) of 2,2-bis((1-(2-benzyl-1*H*-1,2,3-triazol-4-yl)methyl)-1*H*-indene-1,3(2*H*)-dione (**61**)).

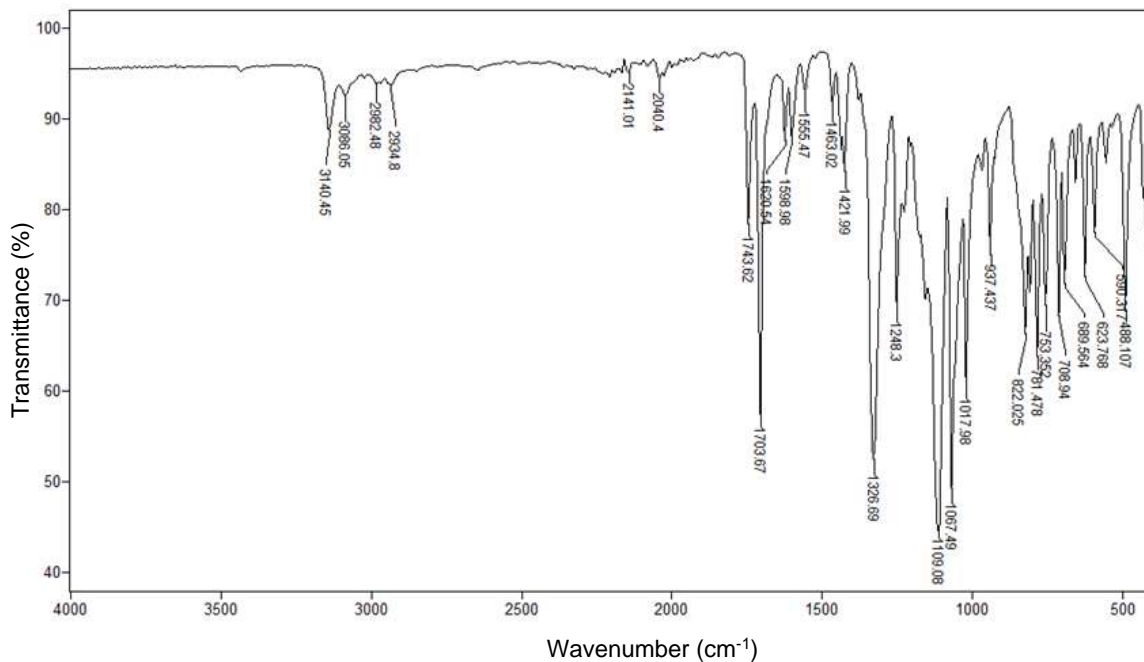

**Fig. DK.** IR spectrum (ATR) of 2,2-bis((1-(4-(trifluoromethyl)benzyl)-1*H*-1,2,3-triazol-4-yl)methyl)-1*H*-indene-1,3(2*H*)-dione (**62**)).

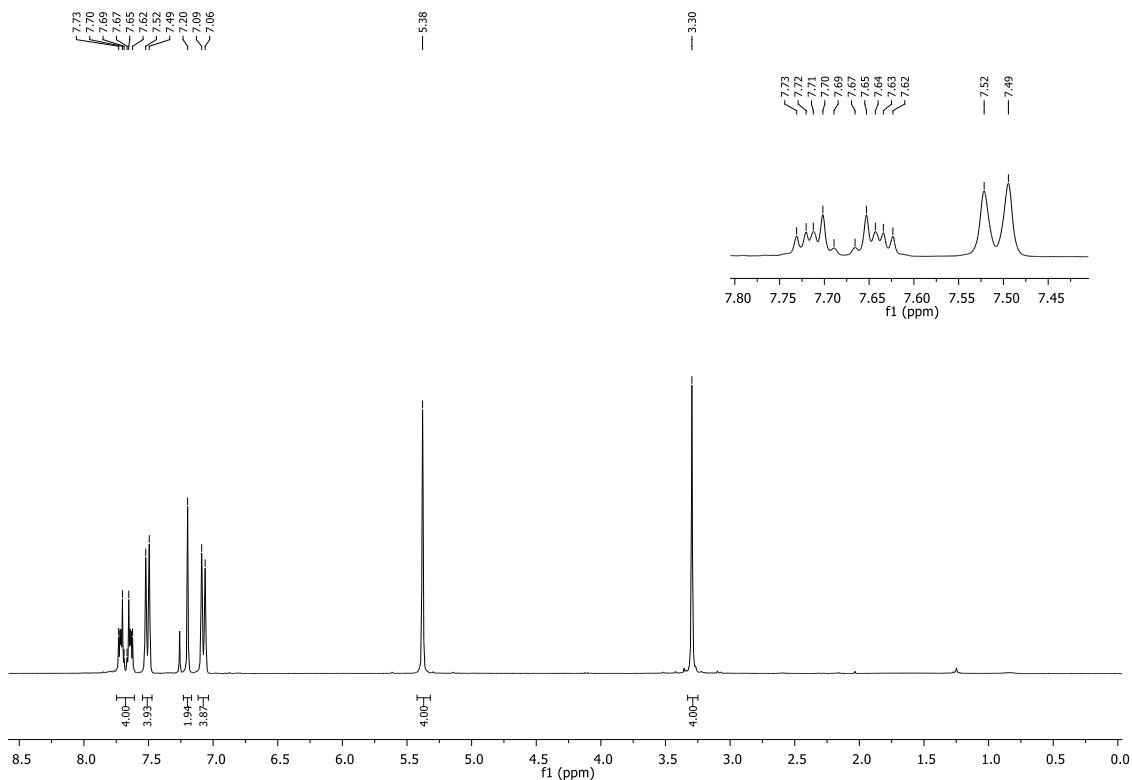

**Fig. DL.**  $^1\text{H}$  NMR spectrum (300 MHz,  $\text{CDCl}_3$ ) of 2,2-bis((1-(4-(trifluoromethyl)benzyl)-1*H*-1,2,3-triazol-4-yl)methyl)-1*H*-indene-1,3(2*H*)-dione (**62**).

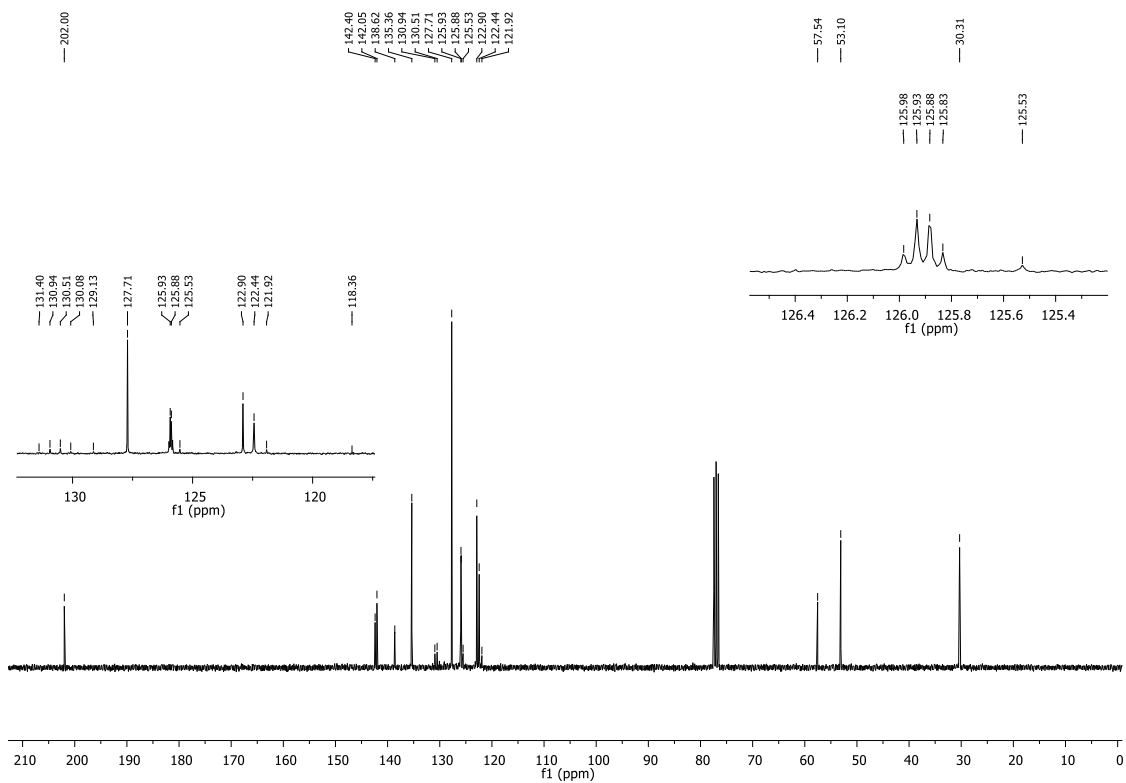

**Fig. DM.**  $^{13}\text{C}$  NMR spectrum (75 MHz,  $\text{CDCl}_3$ ) of 2,2-bis((1-(4-(trifluoromethyl)benzyl)-1*H*-1,2,3-triazol-4-yl)methyl)-1*H*-indene-1,3(2*H*)-dione (**62**).

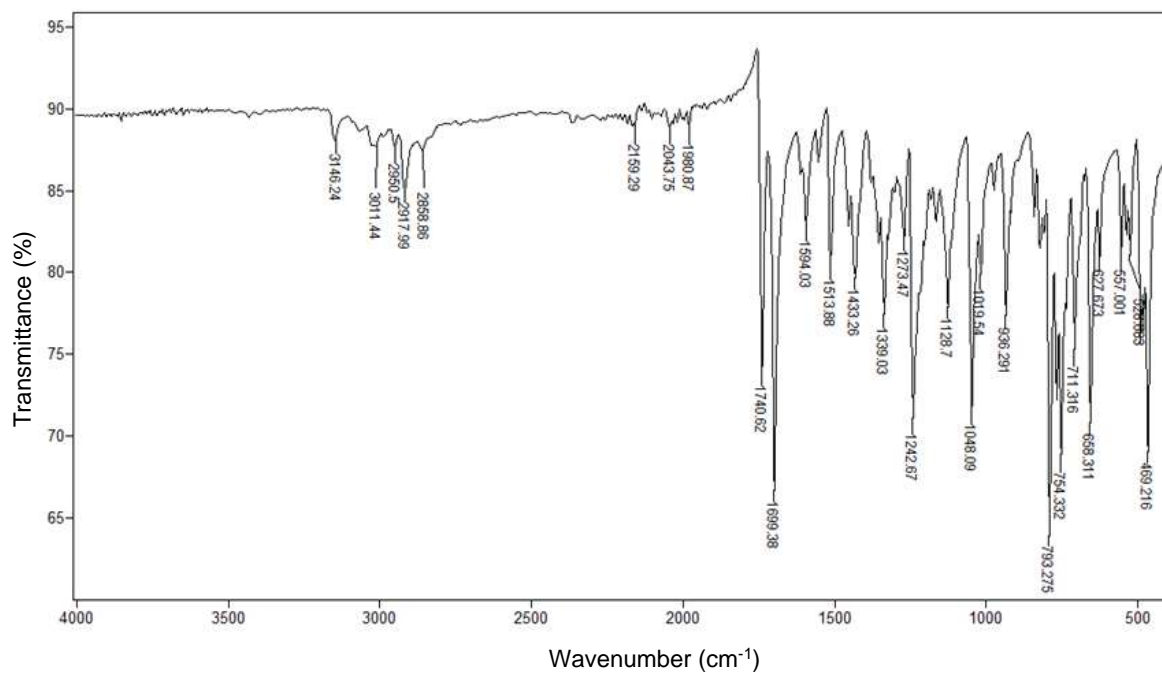

**Fig. DN.** IR spectrum (ATR) of 2,2-bis((1-(4-methylbenzyl)-1H-1,2,3-triazol-4-yl)methyl)-1H-indene-1,3(2H)-dione (**63**).

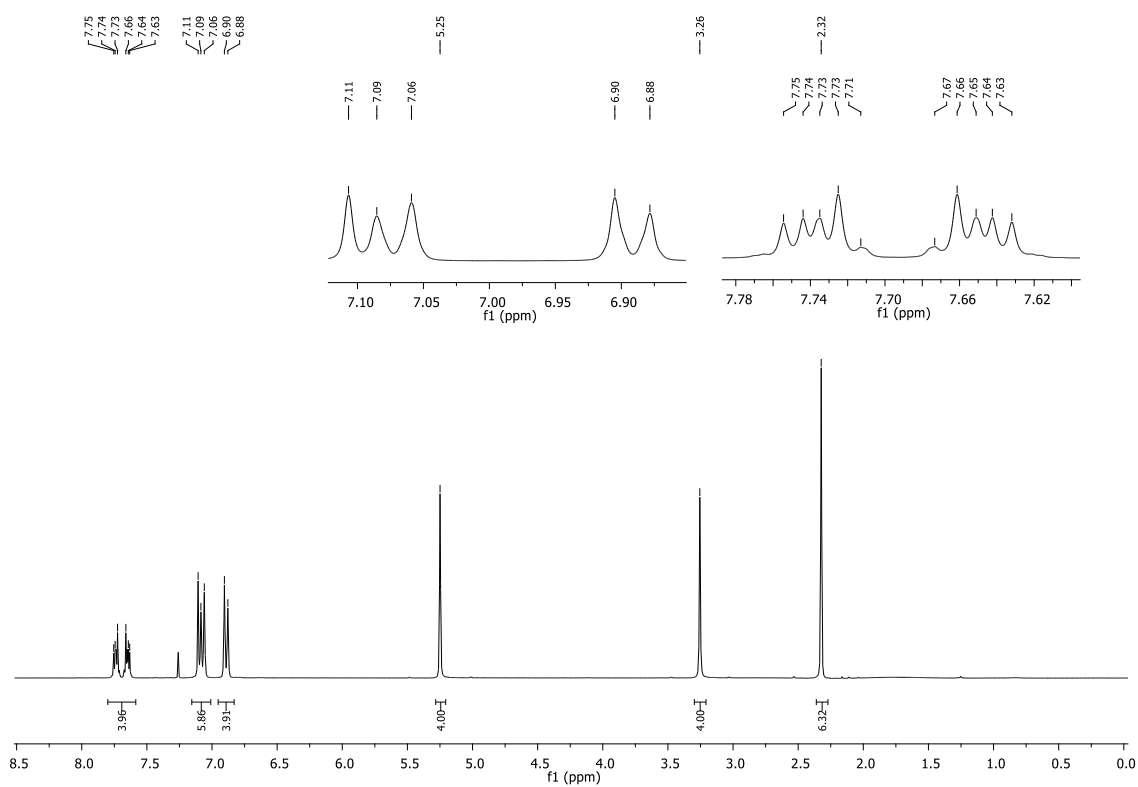

**Fig. DO.** <sup>1</sup>H NMR spectrum (300 MHz, CDCl<sub>3</sub>) of 2,2-bis((1-(4-methylbenzyl)-1H-1,2,3-triazol-4-yl)methyl)-1H-indene-1,3(2H)-dione (**63**).

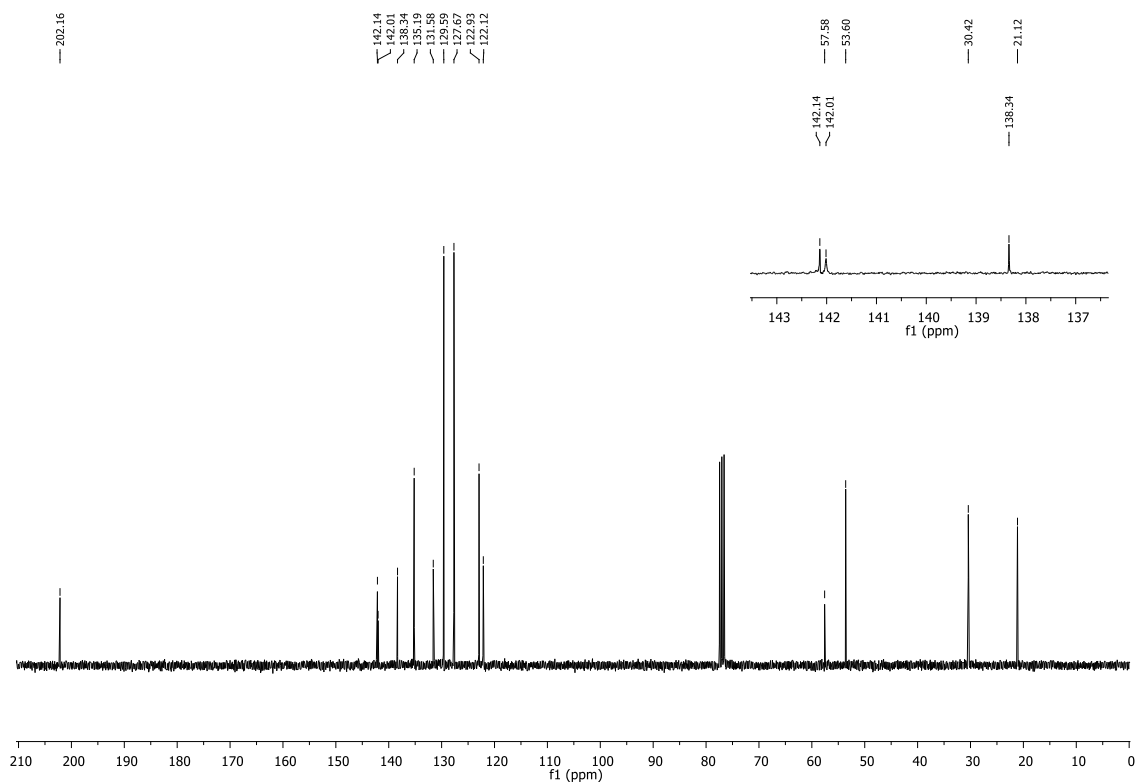

**Fig. DP.**  $^{13}\text{C}$  NMR spectrum (75 MHz,  $\text{CDCl}_3$ ) of 2,2-bis((1-(4-methylbenzyl)-1*H*-1,2,3-triazol-4-yl)methyl)-1*H*-indene-1,3(2*H*)-dione (**63**).
